# Supplementary material for: CTN 328: immunogenicity outcomes in people living with HIV in Canada following vaccination for COVID-19 (HIV-COV): protocol for an observational cohort study
Source: PubMed Central journal article supplement — BMJ Open. 2021 Dec 16;11(12):e054208. doi: 10.1136/bmjopen-2021-054208 (PMC8678543; doi:10.1136/bmjopen-2021-054208), 2021-12-16
Supplement: bmjopen-2021-054208.draft_revisions.pdf [file bmjopen-2021-054208.draft_revisions.pdf]

# BMJ Open

BMJ Open is committed to open peer review. As part of this commitment we make the peer review history of every article we publish publicly available.

When an article is published we post the peer reviewers' comments and the authors' responses online. We also post the versions of the paper that were used during peer review. These are the versions that the peer review comments apply to.

The versions of the paper that follow are the versions that were submitted during the peer review process. They are not the versions of record or the final published versions. They should not be cited or distributed as the published version of this manuscript.

BMJ Open is an open access journal and the full, final, typeset and author-corrected version of record of the manuscript is available on our site with no access controls, subscription charges or pay-per-view fees (<http://bmjopen.bmj.com>).

If you have any questions on BMJ Open's open peer review process please email [info.bmjopen@bmj.com](mailto:info.bmjopen@bmj.com)

# BMJ Open

## CTN 328: Immunogenicity outcomes in people living with HIV in Canada following vaccination for COVID-19 (HIV-COV)-Protocol for an observational cohort study

|                               |                                                                                                                                                                                                                                                                                                                                                                                                                                                                                                                                                                                                                                                                                                                                                                                                                                                                                                                                                                                                                                                                                                                                                                                                                                                                                                                                                                                                                                                                                                                                                                                                                                                                                                                                                                                                                                                                                                                                                                                                                                                                                                                                            |
|-------------------------------|--------------------------------------------------------------------------------------------------------------------------------------------------------------------------------------------------------------------------------------------------------------------------------------------------------------------------------------------------------------------------------------------------------------------------------------------------------------------------------------------------------------------------------------------------------------------------------------------------------------------------------------------------------------------------------------------------------------------------------------------------------------------------------------------------------------------------------------------------------------------------------------------------------------------------------------------------------------------------------------------------------------------------------------------------------------------------------------------------------------------------------------------------------------------------------------------------------------------------------------------------------------------------------------------------------------------------------------------------------------------------------------------------------------------------------------------------------------------------------------------------------------------------------------------------------------------------------------------------------------------------------------------------------------------------------------------------------------------------------------------------------------------------------------------------------------------------------------------------------------------------------------------------------------------------------------------------------------------------------------------------------------------------------------------------------------------------------------------------------------------------------------------|
| Journal:                      | <i>BMJ Open</i>                                                                                                                                                                                                                                                                                                                                                                                                                                                                                                                                                                                                                                                                                                                                                                                                                                                                                                                                                                                                                                                                                                                                                                                                                                                                                                                                                                                                                                                                                                                                                                                                                                                                                                                                                                                                                                                                                                                                                                                                                                                                                                                            |
| Manuscript ID                 | bmjopen-2021-054208                                                                                                                                                                                                                                                                                                                                                                                                                                                                                                                                                                                                                                                                                                                                                                                                                                                                                                                                                                                                                                                                                                                                                                                                                                                                                                                                                                                                                                                                                                                                                                                                                                                                                                                                                                                                                                                                                                                                                                                                                                                                                                                        |
| Article Type:                 | Protocol                                                                                                                                                                                                                                                                                                                                                                                                                                                                                                                                                                                                                                                                                                                                                                                                                                                                                                                                                                                                                                                                                                                                                                                                                                                                                                                                                                                                                                                                                                                                                                                                                                                                                                                                                                                                                                                                                                                                                                                                                                                                                                                                   |
| Date Submitted by the Author: | 05-Jun-2021                                                                                                                                                                                                                                                                                                                                                                                                                                                                                                                                                                                                                                                                                                                                                                                                                                                                                                                                                                                                                                                                                                                                                                                                                                                                                                                                                                                                                                                                                                                                                                                                                                                                                                                                                                                                                                                                                                                                                                                                                                                                                                                                |
| Complete List of Authors:     | <p>Costiniuk, C; McGill University, Chronic Viral Illness Service<br/> Singer, Joel; Canadian Institutes of Health Research Canadian HIV Trials Network; School of Population and Public Health, University of British Columbia, Vancouver, BC, Canada<br/> Langlois, Marc-Andre; University of Ottawa, Biochemistry, Microbiology and Immunology<br/> Kulic, Iva; CIHR Canadian HIV Trials Network<br/> Needham, Judy; Canadian Institutes of Health Research Canadian HIV Trials Network<br/> Burchell, Ann; Li Ka Shing Knowledge Institute, St. Michael's Hospital, Unity Health Toronto, Department of Family and Community Medicine and Centre for Research on Inner City Health; University of Toronto Faculty of Medicine, Department of Family and Community Medicine<br/> Jenabian, Mohammad-Ali; Universite du Quebec a Montreal, Biological Sciences<br/> Walmsley, Sharon; Toronto General Hospital<br/> Ostrowski, Mario; University of Toronto, Immunology; St. Michael's Hospital<br/> Kovacs, Colin; Maple Leaf Medical Clinic<br/> Tan, Darrell; University of Toronto, Department of Medicine, Division of Infectious Diseases; St Michael's Hospital, MAP centre for Urban Health Solutions<br/> Harris, Marianne; BC Centre for Excellence in HIV/AIDS<br/> Hull, Mark; BC Centre for Excellence in HIV/AIDS<br/> Brumme, Zabrina; BC Centre for Excellence in HIV/AIDS; Simon Fraser University, Faculty of Health Sciences<br/> Brockman, Mark; Simon Fraser University, Faculty of Health Sciences; BC Centre for Excellence in HIV/AIDS<br/> Margolese, Shari; CIHR Canadian HIV Trials Network<br/> Mandarino, Enrico; Canadian Institutes of Health Research Canadian HIV Trials Network, Community Advisory<br/> Angel, Jonathan; University of Ottawa, The Ottawa Hospital<br/> Routy, Jean-Pierre; Research Institute of the McGill University Health Centre, Medicine<br/> Anis, Aslam; St. Paul's hospital, Centre for Health Evaluation &amp; Outcome Sciences; University of British Columbia, School of Population and Public Health<br/> Cooper, Curtis; The Ottawa Hospital, Infectious Diseases;</p> |

1  
2  
3  
4  
5  
6  
7  
8  
9  
10  
11  
12  
13  
14  
15  
16  
17  
18  
19  
20  
21  
22  
23  
24  
25  
26  
27  
28  
29  
30  
31  
32  
33  
34  
35  
36  
37  
38  
39  
40  
41  
42  
43  
44  
45  
46  
47  
48  
49  
50  
51  
52  
53  
54  
55  
56  
57  
58  
59  
60

|           |                                                                  |
|-----------|------------------------------------------------------------------|
| Keywords: | HIV & AIDS < INFECTIOUS DISEASES, COVID-19, IMMUNOLOGY, VIROLOGY |
|           |                                                                  |

SCHOLARONE™  
Manuscripts

## PROTOCOL

### **CTN 328: Immunogenicity outcomes in people living with HIV in Canada following vaccination for COVID-19 (HIV-COV)-Protocol for an observational cohort study**

Cecilia T. Costiniuk<sup>1-3</sup>, Joel Singer<sup>4-6</sup>, Marc-André Langlois<sup>7</sup>, Iva Kulic<sup>5-6</sup>, Judy Needham<sup>5-6</sup>, Ann Burchell<sup>8</sup>, Mohammad-Ali Jenabian<sup>9,3</sup>, Sharon Walmsley<sup>10</sup>, Mario Ostrowski<sup>11</sup>, Colin Kovacs<sup>12</sup>, Darrell Tan<sup>10,13-14</sup>, Marianne Harris<sup>15</sup>, Mark Hull<sup>15</sup>, Zabrina L. Brumme<sup>15,16</sup>, Mark A. Brockman<sup>15-17</sup>, Shari Margolese<sup>5</sup>, Enrico Mandarino<sup>5</sup>, Jonathan B. Angel<sup>7,18</sup>, Jean-Pierre Routy<sup>1,2,19</sup>, Aslam Anis<sup>5-7</sup>, Curtis L. Cooper<sup>19</sup>

<sup>1</sup>Division of Infectious Diseases/Chronic Viral Illness Service, McGill University Health Centre, Royal Victoria Hospital: Glen Site; 1001 boulevard Decarie, Montreal, Quebec, Canada (Emails: [Cecilia.costiniuk@mcgill.ca](mailto:Cecilia.costiniuk@mcgill.ca); [jean-pierre.routy@mcgill.ca](mailto:jean-pierre.routy@mcgill.ca))

<sup>2</sup>Infectious Diseases and Immunity in Global Health Research Institute of McGill University Health Centre, 1001 boulevard Decarie, Montreal, Quebec, Canada

<sup>3</sup>Department of Microbiology and Immunology, McGill University, Montreal, Quebec, Canada

<sup>4</sup>School of Population and Public Health, University of British Columbia, Vancouver, British Columbia, Canada. (Email: [jsinger@hivnet.ubc.ca](mailto:jsinger@hivnet.ubc.ca); [ikulic@cheos.ubc.ca](mailto:ikulic@cheos.ubc.ca); [jneedham@cheos.ubc.ca](mailto:jneedham@cheos.ubc.ca))

<sup>5</sup>Canadian HIV Trials Network, Vancouver, British Columbia, Canada (Emails: [shari.margolese@gmail.com](mailto:shari.margolese@gmail.com); [emandarino@rogers.com](mailto:emandarino@rogers.com); [aslam.anis@ubc.ca](mailto:aslam.anis@ubc.ca))

1  
2  
3 <sup>6</sup>Centre for Health Evaluation and Outcome Sciences, St. Paul's Hospital, Vancouver, British  
4  
5 Columbia, Canada  
6

7  
8 <sup>7</sup>Department of Biochemistry, Microbiology and Immunology, University of Ottawa, Ottawa,  
9  
10 Ontario Canada (Email: [langlois@uottawa.ca](mailto:langlois@uottawa.ca))  
11

12  
13 <sup>8</sup>Department of Family and Community Medicine, St Michael's Hospital, Unity Health Toronto  
14  
15 and Dalla Lana School of Public Health, University of Toronto, Toronto, Ontario, Canada (Email:  
16  
17 [ann.burchell@utoronto.ca](mailto:ann.burchell@utoronto.ca))  
18

19  
20 <sup>9</sup>Department of Biological Sciences, Université du Québec à Montréal, Montreal, QC, Canada  
21  
22 Canadian Institutes of Health Research Canadian HIV Trials Network, Vancouver, British  
23  
24 Columbia, Canada. (Email: [jenabian.mohammad-ali@uqam.ca](mailto:jenabian.mohammad-ali@uqam.ca))  
25

26  
27 <sup>10</sup>Department of Medicine, Division of Infectious Diseases, University of Toronto, Toronto,  
28  
29 Ontario (Email: [sharon.walmsley@uhn.ca](mailto:sharon.walmsley@uhn.ca); [darrell.tan@gmail.com](mailto:darrell.tan@gmail.com))  
30

31  
32 <sup>11</sup>Clinical Sciences Division and Department of Immunology, University of Toronto, Li Ka Shing  
33  
34 Knowledge Institute, St. Michael's Hospital, Toronto, Ontario, Canada (Email:  
35  
36 [mario.ostrowski@gmail.com](mailto:mario.ostrowski@gmail.com))  
37

38  
39 <sup>12</sup>Maple Leaf Medical Clinic, Toronto, Ontario, Canada (Email: [ckovacs@mlmedical.com](mailto:ckovacs@mlmedical.com))

40  
41 <sup>13</sup>MAP Centre for Urban Health Solutions, St Michael's Hospital, Toronto, Ontario, Canada

42  
43 <sup>14</sup>Institute of Public Health Policy, Management and Evaluation, Dalla Lana School of Public  
44  
45 Health, University of Toronto, Ontario, Canada  
46

47  
48 <sup>15</sup>British Columbia Centre for Excellence in HIV/AIDS, Vancouver, British Columbia, Canada  
49  
50 (Emails: [mhull@bccfe.ca](mailto:mhull@bccfe.ca); [mharris@bccfe.ca](mailto:mharris@bccfe.ca))  
51

52  
53 <sup>16</sup>Faculty of Health Sciences, Simon Fraser University, Burnaby, British Columbia, Canada  
54  
55 (Email: [zbrumme@bccfe.ca](mailto:zbrumme@bccfe.ca); [mark\\_brockman@sfu.ca](mailto:mark_brockman@sfu.ca))  
56  
57  
58  
59

1  
2  
3 <sup>17</sup>Department of Molecular Biology and Biochemistry, Faculty of Science, Simon Fraser  
4 University, Burnaby, British Columbia, Canada  
5

6  
7  
8 <sup>18</sup>Department of Medicine, Division of Infectious Diseases, The Ottawa Hospital and the Ottawa  
9 Hospital Research Institute, Ottawa, Ontario, Canada ([jangel@ohri.ca](mailto:jangel@ohri.ca); [ccooper@toh.ca](mailto:ccooper@toh.ca))  
10

11  
12 <sup>19</sup>Division of Hematology, Department of Medicine, McGill University Health Centre, Montreal,  
13 Quebec, Canada  
14

15  
16  
17 **Word Count:** 5,191  
18

19  
20 **Correspondence:** Cecilia T. Costiniuk, MD FRCPC, Division of Infectious Diseases and Chronic  
21 Viral Illness Service, Research Institute of the McGill University Health Centre, 1001 boulevard  
22 Decarie, Room EM2.3226, Montreal (QC) Canada, H3A 3J1, Tel: 514-934-1934 ext. 76195; Fax  
23 514-843-2209; Email: [cecilia.costiniuk@mcgill.ca](mailto:cecilia.costiniuk@mcgill.ca)  
24  
25  
26  
27  
28  
29  
30  
31  
32  
33  
34  
35  
36  
37  
38  
39  
40  
41  
42  
43  
44  
45  
46  
47  
48  
49  
50  
51  
52  
53  
54  
55  
56  
57  
58  
59  
60

## ABSTRACT

**Introduction:** Most existing vaccines require higher or additional doses or adjuvants to provide similar protection for people living with HIV (PLWH) compared to HIV-uninfected individuals. Additional research is necessary to inform COVID-19 vaccine use in PLWH.

**Methods and analysis:** This multi-centred observational Canadian cohort study will enroll 400 PLWH aged  $\geq 16$  years from Montreal, Ottawa, Toronto and Vancouver. Subpopulations of PLWH of interest will include: 1)  $>55$  years of age 2) CD4 counts  $<350$  cells/mm<sup>3</sup> 3) multimorbidity ( $\geq 2$  comorbidities) and 4) “stable” or “reference” PLWH (CD4 T cells  $\geq 350$  cells/mm<sup>3</sup>, suppressed viral load for  $\geq 6$  months and  $\leq 1$  comorbidity). Data for 1000 HIV-negative controls will be obtained via a parallel cohort study (Stop the Spread Ottawa) using similar time points and methods. Participants receiving  $\geq 1$  COVID-19 vaccine will attend 5 visits: pre-vaccination; 1 month following the first vaccine dose; and at 3, 6 and 12 months following the second vaccine dose. The primary endpoint will be the percentage of PLWH with COVID-19-specific antibodies at 6 months following the second vaccine dose. Humoral and cell-mediated immune responses, and the interplay between T cell phenotypes and inflammatory markers, will be described. Regression techniques will be used to compare COVID-19-specific immune responses to determine whether there are differences between the “unstable” (CD4 $<350$ ) PLWH group, the stable PLWH cohort and the HIV-negative controls, controlling for factors that are believed to be associated with immune response. Unadjusted analyses will reveal whether there are differences driving factors associated with group membership.

**Ethics and Dissemination:** Written informed consent will be obtained from all study participants prior to enrolment. These findings will inform the design of future COVID-19 clinical trials, dosing strategies aimed to improve immune responses and guideline development for PLWH.

1  
2  
3 **Trial registration:** [clinicaltrials.gov NCT04894448](https://clinicaltrials.gov/ct2/show/study/NCT04894448)  
4

5  
6 **Keywords:** HIV; COVID-19; observational study; COVID-19 vaccines; vaccine immunogenicity  
7  
8  
9

10  
11  
12  
13  
14 **Strengths and Limitations of this study**  
15

- 16  
17 • The largest and most comprehensive immunogenicity study in people living with HIV in  
18  
19 Canada receiving COVID-19 vaccination  
20  
21  
22 • Emphasis on recruiting participants frequently excluded from pharmaceutical company-  
23  
24 sponsored trials and those most likely to have poor outcomes following COVID-19  
25  
26 infection (including individuals of older age, immune non-responders and persons with  
27  
28 multimorbidity)  
29  
30  
31  
32 • Assays used will enable differentiation between individuals with immunity from natural  
33  
34 COVID-19 infection *vs.* vaccine-induced immunity, in addition to detection of immunity  
35  
36 towards key variants of concern (VOCs)  
37  
38  
39 • Involvement of community members from study conception to protocol development and  
40  
41 study implementation  
42  
43  
44 • Limitations include relatively late study start, recruitment restricted to major urban centres  
45  
46 and variations in timing between vaccine doses amongst participants  
47  
48  
49  
50  
51  
52  
53  
54  
55  
56  
57  
58  
59  
60



## BACKGROUND

In Canada today, an estimated 67,000 people are living with HIV (PLWH), 30% of whom are immune non-responders,<sup>1</sup> defined as achieving undetectable HIV viral levels without robust CD4 T cell count recovery (<350 cells/mm<sup>3</sup>). Even with fully suppressed viral load on antiretroviral therapy (ART), chronic HIV infection is characterized by a low-grade elevation in pro-inflammatory and procoagulant biomarkers linked with higher mortality<sup>2-4</sup>. Poor immunogenicity to common vaccines, including influenza<sup>5</sup>, pneumococcal<sup>6,7</sup>, meningococcal<sup>6,7</sup> and hepatitis A<sup>8-10</sup> and B vaccines,<sup>11-13</sup> is well-documented in PLWH with low CD4 T cell counts (<200 cells/mm<sup>3</sup>) and unsuppressed viral loads<sup>14-16</sup>. PLWH face other intersecting vulnerabilities that increase their risk of SARS-CoV-2 acquisition and symptomatic/severe COVID-19; they commonly belong to low socioeconomic or racialized groups disproportionately affected by COVID-19 and have higher rates of risk factors for severe COVID-19 disease (e.g., multiple chronic comorbidities).<sup>17-19</sup> Yet, this priority population has been understudied in COVID-19 vaccine clinical trials.<sup>3, 20</sup> Most HIV seropositive participants enrolled in COVID-19 vaccine trials had normal CD4 T cell counts (>500

1  
2  
3 cells/mm<sup>3</sup>) and few comorbidities.<sup>21,22</sup> As such, the immunogenicity results may not represent the  
4  
5  
6  
7 wide spectrum of PLWH who are followed in Canadian centres today.  
8  
9

10  
11  
12  
13  
14 For the AstraZeneca/Oxford COVID-19 vaccine trial (ChAdOx1, n=160 PLWH) inclusion criteria  
15  
16 specified younger age (<55 years old) and high CD4 T cell count (>350 cells/mm<sup>3</sup>) while  
17  
18 excluding medical comorbidities (e.g., heart, kidney, liver, respiratory diseases etc.).<sup>21</sup> The data  
19  
20 obtained from PLWH were not included in the primary publication.<sup>21</sup> The Moderna trial included  
21  
22 HIV-positive participants (n=176 PLWH) with CD4 T cell count  $\geq 350$  cells/mm<sup>3</sup> and an  
23  
24 undetectable HIV viral load within the past year.<sup>23</sup> COVID-19 infection developed in 11 PLWH  
25  
26 who received placebo but none who received the Moderna vaccine. The Johnson and Johnson trial  
27  
28 (n=1218 PLWH) included participants with “stable/well-controlled HIV infection” (defined as  
29  
30 CD4 T cell counts  $\geq 300$  cells/ $\mu$ L within 6 months prior to screening and documented HIV viral  
31  
32 load <50 copies/mL within 6 months prior to screening) but excluded participants with ongoing  
33  
34 and progressive comorbidities associated with HIV infection.<sup>24</sup> COVID-19 infection developed in  
35  
36 2 vaccinated PLWH and 4 PLWH given placebo. The Novavax trial, conducted in South Africa,  
37  
38 excluded PLWH with chronic cardiovascular disease, gastrointestinal disease, liver disease, renal  
39  
40  
41  
42  
43  
44  
45  
46  
47  
48  
49  
50  
51  
52  
53  
54  
55  
56  
57  
58  
59  
60

1  
2  
3 disease, endocrine disorder and neurological illness, as well as participants with very high body  
4  
5  
6 mass index ( $\geq 40$  Kg/m<sup>2</sup>).<sup>22</sup> As reported by Vivek *et al.*, efficacy of the NVX-CoV2373 Covid-19  
7  
8  
9 vaccine against the B.1.351 variant was examined in 1,857 individuals in South Africa, of whom  
10  
11  
12  
13 30% (500 individuals) had HIV infection<sup>25</sup>. The vaccine efficacy estimate in baseline seronegative  
14  
15  
16 HIV-negative participants was 52.2% (95% confidence interval: -24.8 to 81.7). During the first  
17  
18  
19 60 days of follow-up, the incidence of Covid-19 in HIV-negative placebo participants (5.3% [95%  
20  
21  
22 CI: 4.3 to 6.6) was comparable to the incidence in PLWH placebo participants with HIV (5.2%  
23  
24 [95% CI: 3.6 to 7.2])<sup>26</sup>. Among HIV-negative participants, there were four and two cases of  
25  
26  
27 symptomatic Covid-19 among NVX-CoV2373 and placebo recipients, respectively (N<109 in  
28  
29  
30 each group)<sup>26</sup>. No cases were observed in the baseline HIV-positive population (N<33 in each  
31  
32  
33 group)<sup>26</sup>. Among 94% of participants without HIV, vaccine efficacy was 60.1%. The study was  
34  
35  
36 not powered to detect efficacy in the small population of PLWH<sup>26</sup>.  
37  
38  
39  
40

41 In the ongoing CanSino study in Argentina, which includes approximately 900 PLWH,  
42  
43  
44 preliminary findings are not available to date. While several other trials included PLWH, they  
45  
46  
47 excluded their data from primary publication<sup>20,21,27</sup>. In a recent report by Ruddy *et al.* which  
48  
49  
50 examined COVID-19 antibody response in 12 PLWH a median of 21 days (interquartile range 17-  
51  
52  
53 27) following the first dose of mRNA vaccine (50% Moderna and 50% Pfizer), antibodies were  
54  
55  
56  
57  
58  
59  
60

1  
2  
3 detected in all participants although lower levels were observed in persons with lower CD4 T cell  
4  
5  
6 counts<sup>26</sup>. In this study, all 12 individuals were male, 8% were non-white, all had been on ART  $\geq$ 6  
7  
8  
9 months and 92% had an undetectable HIV viral load. Two individuals had a CD4 T cell count  
10  
11  
12  
13 below 200 cell/mm<sup>3</sup>.<sup>26</sup>  
14  
15

16  
17 We lack robust data on vaccine immunogenicity and immune response durability in  
18  
19  
20 subpopulations of PLWH. No evidence is available on the durability of immunogenicity in PLWH  
21  
22  
23 beyond 3 months following vaccination. Since the hallmark of HIV infection is a reduced number  
24  
25  
26 and function of CD4 T cells, and cell-mediated immunity has emerged as a critical aspect of the  
27  
28  
29 COVID-19 immune response,<sup>28,29,30</sup> it is critical to characterize cellular immune and cytotoxic T  
30  
31  
32 cell responses to COVID-19 vaccination.<sup>31-33</sup>  
33

34  
35 Given that inflammatory markers may influence immune cell activation status and shift cell  
36  
37 profiles towards either Th1 or Th2 responses, impacting vaccine-elicited immune response<sup>34</sup>,  
38  
39 understanding the interplay between immune activation and dysfunction is also important. To  
40  
41  
42 address this need, we are establishing a pan-Canadian prospective cohort of PLWH receiving  
43  
44  
45 COVID-19 vaccines to assess humoral and cellular immunogenicity and to describe the  
46  
47  
48 inflammatory milieu in this context. Safety and tolerability of COVID-19 vaccines in this cohort  
49  
50  
51 of PLWH will also be captured. Of note, COVID-19 vaccines currently approved for use in  
52  
53  
54 Canada include those manufactured by Pfizer, Moderna, AstraZeneca and Janssen (Johnston &  
55  
56  
57  
58  
59  
60

1  
2  
3 Johnston) ([https://www.canada.ca/en/health-canada/services/drugs-health-products/covid19-](https://www.canada.ca/en/health-canada/services/drugs-health-products/covid19-industry/drugs-vaccines-treatments/authorization/list-drugs.html)  
4 industry/drugs-vaccines-treatments/authorization/list-drugs.html). Since the beginning of the  
5 vaccine roll-out Pfizer and Moderna vaccines were administered most often as they were the first  
6 to gain approval by Health Canada. Furthermore, approved, due to concerns associated with  
7 cerebral venous sinus thrombosis and vaccine-induced immune thrombotic thrombocytopenia, use  
8 of the AstraZeneca COVID-19 vaccine has been restricted in some provinces. Furthermore, the  
9 COVID-19 vaccine manufactured by Novavax is not licensed in Canada.  
10  
11  
12  
13  
14  
15  
16  
17  
18  
19  
20  
21  
22

### 23 **Study Objectives:**

#### 24 Primary objective:

25 To evaluate the immunogenicity of COVID-19 vaccination in PLWH, as assessed by COVID-19-  
26 specific immunoglobulin G antibody (IgG) enzyme-linked immunosorbent assay (ELISA), at 6  
27 months following 2<sup>nd</sup> vaccine dose.  
28  
29  
30  
31  
32  
33  
34

#### 35 Secondary objectives:

- 36 1) To assess neutralization capacity of COVID-19-specific IgG at 6 months following 2<sup>nd</sup> vaccine  
37 dose.  
38
- 39 2) To assess the durability of COVID-19-specific IgG response in PLWH at 12 months following  
40 vaccination.  
41  
42
- 43 3) To examine changes in the proportion and activation phenotype of CD4 T cells, CD8 T cells, B  
44 cells, natural killer cells and monocytes, including gene expression and cytokine production, pre-  
45 and post-COVID-19 vaccination at 6 months following 2<sup>nd</sup> vaccine dose.  
46  
47  
48  
49  
50  
51  
52  
53  
54  
55  
56  
57  
58  
59  
60

1  
2  
3 4) To determine safety and tolerability of COVID-19 vaccines in PLWH, based on local or  
4  
5 systemic adverse events following first or second injections.  
6  
7

8 Exploratory objectives:  
9

10  
11 1) To determine if subpopulations of PLWH respond differently to COVID-19 vaccination.  
12  
13 Subpopulations of interest include, 1) PLWH >55 years of age; 2) immune non-responders (ART  
14  
15 treated, and fully suppressed HIV RNA (<40 copies/mL), but CD4 T cell counts below 350  
16  
17 cells/mm<sup>3</sup> and CD4/CD8 T cell ratio <0.75); 3) PLWH with multimorbidity (2 or more chronic  
18  
19 diseases) and 4) PLWH “reference” participants (with CD4 T cells >350 cells/mm<sup>3</sup>, suppressed  
20  
21 viral load for at least 6 months, and have at most 1 comorbidity) (*Note: groups will not be mutually*  
22  
23 *exclusive but will likely have overlapping characteristics*)  
24  
25

26  
27  
28 (2) To investigate if current COVID-19 vaccines elicit IgG that cross-recognize key COVID-19  
29  
30 variants of concern (VoC), and if this differs in PLWH compared to individuals without HIV  
31

32  
33 (3) To compare virus-specific T cell responses generated by COVID-19 vaccines in PLWH and  
34  
35 compare results with HIV-negative populations  
36  
37  
38  
39  
40

## 41 **METHODS AND ANALYSIS**

### 42 **Study design**

43  
44  
45  
46 This study is a multi-centre prospective observational cohort study. Approximately four hundred  
47  
48 (400) PLWH aged  $\geq 16$  years will be recruited from 4 sites in 3 Canadian provinces including 1)  
49  
50 McGill University Health Centre/Jewish General Hospital (Montreal), 2) Ottawa Hospital  
51  
52 Research Institute, 3) The University Health Network (Toronto), and 4) St. Paul’s Hospital  
53  
54 (Vancouver). Many sites provide HIV care for many clients who are visible minorities and  
55  
56  
57  
58  
59  
60

1  
2  
3 multiple morbidities. This will enable our sites to recruit a study population representative of  
4  
5 PLWH most likely to be impacted by detrimental COVID-19-related outcomes.<sup>19</sup> Data for HIV-  
6  
7 negative individuals will be obtained from the Stop the Spread Ottawa (SSO) cohort. Since we  
8  
9 will not perform additional analyses on the samples of the SSO cohort who we are going to include  
10  
11 in our study, then we can include all the participants in the SSO study and matching of HIV-  
12  
13 negative and HIV-positive participants will not be required.  
14  
15

16  
17  
18  
19  
20 Determination of which vaccine is administered at which time point and to which individuals is  
21  
22 dictated by Canada's provincial governments, with input from the National Advisory Committee  
23  
24 on Immunization (NACI), and is not influenced by study investigators or staff. We will include  
25  
26 participants irrespective of the specific type of COVID-19 vaccine. Furthermore, the duration of  
27  
28 the interval between 1<sup>st</sup> and 2<sup>nd</sup> doses time from when the vaccine was administered will not  
29  
30 influence eligibility, since Canada has decided to extend dose intervals for all 2 dose vaccines to  
31  
32 4 months. However, the duration of interval between vaccine doses will included as an outcome  
33  
34 variable.  
35  
36  
37  
38  
39  
40  
41  
42  
43

#### 44 **Methods: Participants, intervention and comparator and outcomes**

45  
46 **Inclusion Criteria:** 1) Age  $\geq 16$  years; 2) HIV-positive for HIV group, immunocompetent and  
47  
48 generally in good health for the HIV-negative group; and 3) Receiving  $\geq 1$  dose of COVID-19  
49  
50 vaccine. Persons are still eligible to participate if they have already received one or two vaccine  
51  
52 doses.  
53  
54  
55  
56  
57  
58  
59  
60

1  
2  
3 **Exclusion Criteria:** 1) Receipt of any blood product or immunoglobulin preparation within 1  
4 month of vaccine administration and until study completion; 2) signs/symptoms of active COVID-  
5 19 at time of enrollment; 3) for the HIV-negative group: immune-compromising conditions or on  
6 immunosuppressant medications. Prior receipt of other vaccines  $\leq 12$  months or past COVID-19  
7 infection are not exclusion criteria but will be recorded. Detectable HIV viral load on ART is not  
8 exclusionary.  
9

10  
11  
12 The following groups of PLWH will be prioritized for study enrolment:  
13  
14

- 15  
16  
17 1. Older age (55 years and over). Older age is associated with immunosenescence and  
18 results in lower vaccine efficacy.<sup>35-37</sup> We have selected 55 as the specific age cut-off  
19 since PLWH tend to develop comorbidities at an earlier age.  
20
- 21  
22 2. Immune non-responders (CD4 T cell count  $< 350$  cells/mm<sup>3</sup>, CD4/CD8  $< 0.75$  with  
23 undetectable viral load for 1+ year). Immune non-responders may be at risk of more  
24 adverse COVID-19 related outcomes than HIV immune responders<sup>38,39,40,41</sup>.  
25
- 26  
27 3. Multi-morbidity (defined as having  $\geq 2$  comorbidities). Comorbidities may include  
28 cardiovascular disease (CVD) or CVD equivalents such as tobacco smoking. Other  
29 comorbidities include CMV co-infection, hypertension, dyslipidemia, diabetes, chronic  
30 obstructive pulmonary disease and obesity, as these are all common comorbidities  
31 among PLWH<sup>2,42-45</sup> and factors that contribute to worse outcomes with COVID-19.<sup>46</sup>  
32  
33
- 34  
35 4. HIV-positive “stable” or “reference” group. These persons will have undetectable HIV  
36 viral load for  $> 6$  months, CD4 T cell counts  $> 350$  cells/mm<sup>3</sup>, and a maximum of 1  
37 comorbidity. To capture the full spectrum of individuals in the HIV-negative group, we  
38 will include this HIV-positive “stable” group so that we can determine whether there are  
39  
40  
41  
42  
43  
44  
45  
46  
47  
48  
49  
50  
51  
52  
53  
54  
55  
56  
57  
58  
59  
60



1  
2  
3 particular characteristics within PLWH which impact on immune response. In comparing  
4 the stable and unstable groups, we will be able to determine whether participants with low  
5 CD4 counts ( $<350\text{cells}/\text{mm}^3$ ) differ in their response to vaccine from those with normal  
6 CD4 T cell counts while controlling for other characteristics. We aim to enroll HIV-  
7 negative and HIV-positive “stable” individuals with overlapping characteristics (i.e., some  
8 should have multiple comorbidities) so that the groups are comparable.  
9  
10  
11  
12  
13  
14  
15  
16  
17

### 18 **General Methodology and participant timeline**

19  
20  
21 Participants will attend 5 visits over 12 months: pre-vaccination; 1 month following first vaccine  
22 dose; and at 3, 6 and 12 months following the second vaccine dose (**Table 1**). Each visit will last  
23 between 20-60 minutes.  
24  
25  
26  
27

28  
29 **Primary Endpoint:** Percentage of PLWH with COVID-19-specific antibodies at 6 months  
30 following 2<sup>nd</sup> vaccine dose.  
31  
32

33  
34 **Secondary Endpoints:** Percentage of individuals with 1) COVID-19 neutralization capacity at 6  
35 months following 2<sup>nd</sup> vaccine dose and 2) COVID-19-specific antibodies at 12 months following  
36 2<sup>nd</sup> vaccine dose. 3) Proportion and activation status of CD4 T cells, CD8 T cells, B cells, natural  
37 killer cells and monocytes, pre-vaccination and 6 months post 2<sup>nd</sup> vaccine dose.  
38  
39  
40  
41  
42

43  
44 **Exploratory Endpoints:** 1) COVID-19-specific antibodies at 6 months following 2<sup>nd</sup> vaccine dose,  
45 stratified by subpopulations. Critically, we will also assess the ability of vaccine-elicited antibodies  
46 to cross-recognize SARS-CoV-2 S protein variants, including N501Y and/or E484K, using in-  
47 house assays.  
48  
49  
50  
51  
52  
53  
54  
55  
56  
57  
58  
59  
60

## Sample size

Our primary outcome is the proportion of individuals in each group who mount a satisfactory immune response, although the best marker of what constitutes a satisfactory immune response is unclear at the moment and the science is rapidly evolving. We initially defined a successful immune response as a 4-fold relative rise in IgG production at 6 months.<sup>47</sup> We anticipated that 90% of HIV-negative individuals would mount an adequate IgG response at this timepoint<sup>27,34</sup>, versus 70% of PLWH.<sup>12,48</sup> If 20% of the sample were to have the characteristic of interest or predictor variable (e.g., 20% with multimorbidities), enrolling 200 PLWH and 50 HIV-negative participants would provide sufficient statistical power (>80%) to detect a 20% difference in outcomes between groups whatever the exact proportions. In addition, we calculated that we would have >80% power to detect a 20% difference in outcome between those with suppressed CD4 count or unsuppressed viral load and the HIV- group. Previous studies of temporal differences in humoral and cellular responses to COVID-19 have shown differences between individuals when sample sizes included 100 participants or fewer.<sup>49-53</sup> We would also have >80% power to detect a 20% difference in outcome between the higher risk PLWH (ie, with CD4 counts <200 cells/mm<sup>3</sup> and/or unsuppressed HIV viral load) and the HIV-negative group. Such recruitment targets would also also provide a sufficient buffer to account for potential drop-outs of 5-10%. However, to increase our ability to detect differences in our primary outcome between the four sub-populations of interest (individuals of older age; immune non-responders; persons with multimorbidity; and an HIV-positive “stable” or “reference” group), we plan to recruit 400 PLWH and use data from the *entire* cohort of HIV-negative individuals in the SSO study (approximately 1000 individuals) to increase power. Inevitably, the higher risk groups will be overlapping, so we will recruit a

1  
2  
3 minimum of 20% of the 400 PLWH per category. By using the entire cohort of HIV-negative  
4 individuals in the SSO study, we avoid the need to match PLWH and HIV-negative participants.  
5  
6  
7  
8  
9

## 10 **Recruitment**

11  
12  
13 Participants will be informed about the study through a recruitment flyer during routine physician  
14 visits to their HIV clinic and via established recruitment strategies through our community partners  
15 and the CIHR Canadian HIV Trials Network (CTN) via webpages, email, and social media  
16 platforms. Individuals followed for routine HIV care at clinics other than the 4 enrolment sites are  
17 eligible to participate if they can come to the enrolment site for study visits. Participants will be  
18 compensated \$40 per study visit to help offset the time commitment and parking fees. We will  
19 make a concerted effort, through the use of recruitment quotas, to ensure the HIV-negative and  
20 HIV-positive “stable” groups have overlapping characteristics (eg, age >55 years, CD4 count <350  
21 cells/mm<sup>3</sup>, comorbidities) so that the groups will be comparable.  
22  
23  
24  
25  
26  
27  
28  
29  
30  
31  
32  
33  
34  
35  
36

## 37 **Data Collection**

38  
39  
40 Medical history and HIV history will be gathered from both patient interviews and clinic chart  
41 reviews following written informed consent. Information extracted will include comorbidities,  
42 year of HIV diagnosis, CD4 T cell nadir (if known) in addition to tobacco smoking and cannabis  
43 use history. Medications will be recorded in addition to the ART regimen. History of COVID-19  
44 infection and date of confirmatory test will be recorded.  
45  
46  
47  
48  
49  
50

51 **Sample Collection:** At each visit, blood will be collected to isolate serum, plasma and peripheral  
52 blood mononuclear cells (PBMCs).  
53  
54  
55  
56  
57  
58  
59  
60

1  
2  
3 ***Humoral Immunity (SARS-CoV-2 Binding Antibodies):*** We will evaluate levels of  
4 immunoglobulins M and A (IgM, IgA) and IgG targeting the SARS-CoV-2 Spike (S) protein  
5 receptor-binding domain (RBD) and nucleocapsid protein using a high-throughput automated  
6 ELISA co-developed and validated by Dr Marc-Andre Langlois,<sup>54</sup> thereby distinguishing vaccine-  
7 induced (S only) from infection-induced (S and nucleocapsid (N)) responses. We will also evaluate  
8 samples for IgM and IgG antibody cross-recognition of RBD VoC, including those harbouring  
9 *N501Y and/or E484K* (e.g., United Kingdom and South African strains, respectively) using a  
10 multiplex ELISA assay developed by Dr Mark Brockman.<sup>55</sup> This assay can be rapidly adapted to  
11 accommodate emerging variants. We will test plasma samples for their capacity to block viral  
12 entry using a well-established neutralization assay based on retroviruses pseudotyped with the  
13 SARS-CoV-2 S protein.<sup>49,51</sup>

14  
15  
16  
17  
18  
19  
20  
21  
22  
23  
24  
25  
26  
27  
28  
29 ***Cellular Immunity:*** Flow cytometry will be performed to enumerate CD4 T cells (including helper  
30 and regulatory subsets), CD8 T cells and other T cell subsets (including naïve, central memory,  
31 transitional memory, effector memory and terminally differentiated cells), B cells (including naïve,  
32 memory and antibody-secreting B cells), Natural Killer cells and monocytes (classical,  
33 inflammatory and non-classical). We will also evaluate markers of cellular immune activation,  
34 senescence and exhaustion. Following high-resolution Human Leukocyte Antigen class I/II typing,  
35 we will examine COVID-19-specific T cell responses using an activation-induced marker (AIM)  
36 assay. Briefly, PBMCs will be stimulated overnight with pools of SARS-CoV-2 S peptides.  
37 Activated CD4 and CD8 T cells will be quantified by flow cytometry-based expression of CD137,  
38 OX40 and/or CD69. Gene expression will be assessed by single-cell RNA sequencing of PBMC  
39 as described previously.<sup>56</sup> T and B cell epitope specificity will be confirmed using virus-derived  
40 antigens (peptide/HLA or RBD dextramers, respectively). Plasma levels of inflammatory markers  
41  
42  
43  
44  
45  
46  
47  
48  
49  
50  
51  
52  
53  
54  
55  
56  
57  
58  
59  
60

1  
2  
3 including interferon (IFN)- $\gamma$ , interleukin (IL)-1 $\beta$ , IL-2, IL-4 IL-6, IL-8, IL-10, IL-13, IL-17,  
4 transforming growth factor (TGF)- $\beta$ , IFN- $\gamma$ -induced protein-10 (IP-10), IL-12p70 and tumour  
5 necrosis factor (TNF)- $\alpha$  will be measured using multiplex Luminex assays, D-dimer, C-reactive  
6 protein, and markers of microbial translocation lipopolysaccharide (LPS), beta-d-glucan ( $\beta$ dG) and  
7 soluble CD14 will be evaluated by ELISA.<sup>57</sup>  
8  
9  
10  
11  
12  
13  
14  
15  
16  
17  
18  
19  
20

### 21 **Exploratory Safety and Tolerability of COVID-19 Vaccines in PLWH**

22 In the prospective cohort, we will explore vaccine safety and efficacy to inform subsequent studies.

23 Reactogenicity: **Symptoms Diary:** Participants will be asked to document specific local and  
24 systemic reactions in a diary for 1 week and 1 month following each injection, as was done in  
25 Pfizer-BioNTech Phase 3 studies.<sup>47</sup> We will report the proportion of participants developing local  
26 (redness, pain or swelling at the injection site) or systemic effects (fatigue, headache, muscle pain,  
27 fever, joint pain, diarrhea) within 7-30 days following each vaccine dose with 95% confidence  
28 intervals (Supplementary information).  
29  
30  
31  
32  
33  
34  
35  
36  
37  
38

39 **COVID-19 Questionnaires:** We will administer the COVID-19 System Questionnaire to  
40 participants who develop a flu-like illness to confirm the illness, along with PCR-based tests for  
41 COVID-19. Participants will complete the COVID-19 Immunity Task Force (CITF) Standardized  
42 Core Survey Data Elements questionnaire prior to vaccination and a modified CITF questionnaire  
43 (minus the demographic information) at follow-up visits (Supplementary information).  
44  
45  
46  
47  
48  
49  
50

51 If participants develop COVID-19 symptoms 14 days+ after vaccination, we will also collect CITF  
52 system questionnaire (length of illness and symptomatology, which vaccine was administered,  
53 number of doses vaccine received) and saliva specimens to enable study of COVID-19 variants of  
54  
55  
56  
57  
58  
59  
60

1  
2  
3 concern. ([https://www.covid19immunitytaskforce.ca/covid-19-immunity-task-force-releases-](https://www.covid19immunitytaskforce.ca/covid-19-immunity-task-force-releases-standardized-core-survey-data-elements/)  
4 [standardized-core-survey-data-elements/](https://www.covid19immunitytaskforce.ca/covid-19-immunity-task-force-releases-standardized-core-survey-data-elements/))  
5  
6  
7  
8  
9

## 10 **Data management**

11  
12  
13 The study sponsor, the CTN, will be responsible for national project management, database  
14 development, data management and data analysis. To facilitate data sharing, we will: 1) use  
15 standard encodings for CITF-defined Core Data Elements; 1) request immunogenicity study  
16 participants consent to data sharing as guided by the CITF, including collecting survey elements  
17 and saliva 14+ days after vaccination on symptomatic participants to determine whether the  
18 infecting strain is a COVID-19 VoC and 3) rapidly share interim data and all requested study  
19 metadata for cataloguing.  
20  
21  
22  
23  
24  
25  
26  
27  
28  
29  
30

## 31 **Confidentiality**

32  
33  
34 All participant-related information, including Case Report Forms, laboratory specimens,  
35 evaluation forms and reports, will be kept strictly confidential. All records will be held in a secure,  
36 locked location and only accessible to research staff. Participants will be identified using a coded  
37 number specific to each participant. All computerized databases will identify participants by  
38 numeric codes only and will be password protected. Upon request, and in the presence of the  
39 investigator or his/her representative, participant data will be made available to the study sponsor,  
40 monitoring groups representative of the study sponsor, representatives of funding groups, and  
41 applicable regulatory agencies to verify clinical study procedures and/or data, as is permissible by  
42 local regulations.  
43  
44  
45  
46  
47  
48  
49  
50  
51  
52  
53  
54  
55  
56  
57  
58  
59  
60

## Statistical Analyses

We will use regression techniques to compare COVID-19-specific immune responses applying data transformation where necessary to conform with distributional assumptions in order to determine whether there are differences between the “unstable” (CD4<350) PLWH group, the stable PLWH cohort and the HIV- controls, controlling for factors that are believed to be associated with immune response. We will also perform unadjusted analyses to determine whether there are differences which may or not be driven by factors associated with group membership. We will report data from exploratory analyses with descriptive statistics and data for vaccines from different manufacturers separately and combined. We will stratify results by the number of doses received and the time interval between the two doses in case these factors drive response and differ between groups. We will stratify immunogenicity data by sex as females and males have differences in both vaccine-elicited immune responses<sup>58</sup> and adverse effects from vaccines.<sup>59</sup> Furthermore, we will stratify analyses by individuals who are naive to COVID-19 versus those with pre-existing antibodies as a result of prior COVID-19 infection. This will be important since antibody responses (particularly after the 1st dose) will be much higher in convalescent individuals,<sup>60,61</sup> so it is not appropriate to include them with individuals who do not have pre-existing antibodies to COVID-19.

## ETHICS AND DISSEMINATION

### Ethics approval and consent to participate

1  
2  
3 Written informed consent will be obtained from all study participants. The study will be  
4  
5 conducted in accordance with the Declaration of Helsinki. At the time of manuscript  
6  
7 preparation, a very closely related protocol has been approved by the University of British  
8  
9 Columbia/Providence Health Care Research Institute and Simon Fraser University Research  
10  
11 Ethics Boards. The present protocol is under review by the Research Institute of the McGill  
12  
13 University Health Centre (2<sup>nd</sup> review), the Ottawa Hospital Research Ethics Board, the  
14  
15 University of Toronto Research Ethics Board. Patient enrollment for this trial is anticipated  
16  
17 to begin June 2021.  
18  
19  
20  
21  
22  
23  
24

#### 25 **Availability of data and materials**

26  
27  
28 De-identified participant data will be stored on a secure password-protected RedCap database.  
29  
30 Access to the database will be controlled by the CTN. Access to the final study database will be  
31  
32 provided upon written reasonable request to the corresponding author/principal investigator  
33  
34 following publication and CTN and CITF approval.  
35  
36  
37  
38

39  
40 We will standardize reagents and analysis strategies, where possible, working with the Immune  
41  
42 Sciences Network and Testing Working Party recommendations to enable data sharing and avoid  
43  
44 duplication in consultation with other CIHR and CITF-funded vaccine surveillance projects. We  
45  
46 will also contribute results to SeroTracker, a knowledge hub that tracks and synthesizes findings  
47  
48 from SARS- CoV-2 serosurveillance efforts worldwide  
49  
50 (<https://www.covid19immunitytaskforce.ca/serotracker/>). To inform COVID-19 immunization  
51  
52 guidelines and future interventions for PLWH in Canada and internationally, we are committed to  
53  
54  
55  
56  
57  
58  
59  
60



1  
2  
3 sharing results with all stakeholders and will adhere to Wellcome's *Sharing research data and*  
4  
5  
6  
7 *findings relevant to the novel coronavirus (COVID-19) outbreak* statement.<sup>62</sup>  
8  
9  
10  
11  
12  
13  
14  
15

### 16 **Knowledge Translation (KT) & Dissemination Plan**

17

18  
19 Serology results will be provided to individual study participants at the end of the study, along  
20  
21  
22 with a summary of study results and their implication in lay language. We prioritize meaningful  
23  
24  
25 community engagement and our Community Advisory Committee includes PLWH and  
26  
27 representation from the Canadian Aboriginal AIDS Network. The Community Advisory  
28  
29  
30 Committee reviews protocols and informed consent forms and advises on community priorities.  
31  
32  
33  
34 Our well-established relationship with CATIE, Canada's source for HIV information, will enhance  
35  
36  
37  
38  
39  
40  
41  
42  
43  
44  
45  
46  
47  
48  
49  
50  
51  
52  
53  
54  
55  
56  
57  
58  
59  
60  
KT. We will leverage our KT staff to share lay language updates via press releases, media  
coverage, website, e-newsletters and social media and undertake targeted KT activities to mobilize  
knowledge across our network and report results to senior policymakers, via research summaries  
and policy briefs, and community groups and participants, via factsheets. Our team will publish  
manuscripts, contribute to guidelines, and present to stakeholders.

## Patient and Public Involvement

The CTN Community Advisory Committee (CAC) was involved in the peer review process of this study proposal and deemed that the research questions addressed were of very high priority to PLWH. The CAC's critiques of the initial proposal were taken into account in the revised proposal. Two members of the CAC (SM and EM) were involved in finalizing the study design, inclusion/exclusion criteria, outcome measures and monitoring plans and are formal study investigators and co-authors. Community consultants will receive financial compensation to recognize their time commitment and expertise.

## DISCUSSION

Herein, we present the protocol for an observational cohort study to evaluate COVID-19 vaccine-elicited immunogenicity in PLWH, with a priority of determining immunogenicity in PLWH who are of older age, immune non-responders and those with multimorbidity. These 3 groups were selected since they represent subpopulations most likely to experience poor outcomes following COVID-19 infection and have a weaker immune response to vaccination.

PLWH immune non-responders are at risk of more adverse COVID-19 related outcomes than HIV immune responders. In the study performed by Braunstein *et al.*, PLWH with COVID-19 infection had a higher proportion of hospital admissions, intensive care unit (ICU) admission and death. Those who experienced these COVID-19-related outcomes had CD4 T cell counts below 500

1  
2  
3 cells/mm<sup>3</sup>.<sup>3,38</sup> Similarly, the study by Dandachi *et al.* found that having CD4 T cell counts below  
4  
5 200 cells/mm<sup>3</sup> was associated with severe outcomes such as ICU admission, intubation and  
6  
7 death.<sup>39</sup> Furthermore, a multicentre cohort study by Hoffman *et al.* showed that CD4 T cell counts  
8  
9 <350 cells/mm<sup>3</sup> were associated with severe COVID-19 (adjusted OR 2.85, 95% CI 1.26-6.44 ).<sup>40</sup>  
10  
11  
12 However, in a group of patients with inborn errors of immunity, Kinoshita *et al.* they demonstrated  
13  
14 robust T cell activity and humoral immunity against COVID-19 structural proteins in some  
15  
16 patients with antibody deficiency,<sup>63</sup> underscoring the heterogeneity and complexity of immune  
17  
18 response.  
19  
20  
21  
22  
23  
24

25 A major challenge with planning this study is the unprecedented, rapidly-changing nature of the  
26  
27 COVID-19 pandemic and evolving scientific information. As a result, data on the optimal time  
28  
29 points to assess immune responses post COVID-19 vaccination administration are rapidly  
30  
31 changing, resulting in multiple adjustments in our protocol plans. Within Canada, the vaccination  
32  
33 schedule is determined by the provinces with input from NACI. However, differences exist  
34  
35 between provinces regarding to vaccine supply, eligibility criteria, type of vaccine administered  
36  
37 and time period between vaccine doses. We are mitigating these challenges by holding monthly  
38  
39 meetings with teams to discuss these issues over the previous month, troubleshoot and adjust  
40  
41 recruitment priorities accordingly for the upcoming month. Ideally, and under non-pandemic  
42  
43 circumstances, we would establish, a priori, methods for analyzing data from single vs. two-dose  
44  
45 vaccines. However, in the current context with uncertainty of vaccine supply and distribution, such  
46  
47 detailed plans are impractical and will depend on the methods of vaccination used in the  
48  
49 participants enrolling in this study. This statement holds true for other variables we will likely  
50  
51 encounter, such as different dosing intervals amongst persons receiving two-dose vaccines.  
52  
53  
54  
55  
56  
57  
58  
59  
60

1  
2  
3  
4  
5  
6  
7 The importance of advanced age in impaired vaccine-induced immunogenicity is well-  
8  
9  
10 documented. Due to a combination of disrupted in posttranscriptional regulation, T cell receptor  
11  
12  
13 signalling, and metabolic function, older individuals demonstrate reduced quantity and  
14  
15  
16 functionality of T-cells<sup>64,65</sup>. When this balance is disrupted, T-cells exhibit shorter-lived effector  
17  
18  
19 phenotypes rather than memory or follicular helper T cells and vaccine-induced antibodies are less  
20  
21  
22 protective than in younger persons<sup>64,65</sup>. As the elderly are considered a priority vaccination group,  
23  
24  
25  
26 many of them were eligible for vaccination in early 2021 in Canada, before this current study  
27  
28  
29 began, meaning that baseline plasma, serum and PBMCs will not be available for participants in  
30  
31  
32 this subpopulation of interest. Another drawback with starting this study in May 2021 is that we  
33  
34  
35 may miss other important groups of PLWH, including Indigenous persons who were prioritized as  
36  
37  
38 high-risk populations for immunization and were eligible to receive COVID-19 vaccines at a  
39  
40  
41 younger age than the general population.  
42  
43  
44

45  
46 Another major challenge with the planning of this study was the need to ensure an adequate sample  
47  
48 size to meet the primary objective in the group as a whole, but also in important subpopulations of  
49  
50 PLWH. Enrollment of such a large number of individuals, with follow-up until 12 months  
51  
52 following the second vaccine dose, is very resource-intensive and requires dedicated study  
53  
54 participants. We will provide individualized antibody results to participants at study completion to  
55  
56  
57  
58  
59

1  
2  
3 increase study engagement and prevent drop-outs. Furthermore, due to the need to rapidly enroll  
4 participants to match the pace of the COVID-19 vaccine rollout, we decided to use CTN study  
5 sites with large clinic volumes and proven capacity to recruit. However, these clinics are based in  
6 urban centres and, therefore, may follow individuals who differ systematically from PLWH  
7 followed outside of the cities. PLWH who live in cities may be of higher socioeconomic status and  
8 consist of more men who have sex with men (MSM). Therefore, each site will need to make a  
9 concerted effort to recruit sufficient participants with other profiles. For this reason, we will  
10 employ a flexible recruitment strategy, whereby sites that can recruit the required participants with  
11 characteristics of interest more easily than other sites can help to make up for lower recruitment  
12 flexibility at other sites. As with many studies, recruitment of women living with HIV may be  
13 challenging. Due to our connection with other studies within the CTN and the help of our  
14 community advisory board, we are encouraging clinics with predominantly female clients to  
15 ensure they inform their female patients living with HIV about this study.  
16  
17  
18  
19  
20  
21  
22  
23  
24  
25  
26  
27  
28  
29  
30  
31  
32  
33  
34  
35

36 Currently, the immune correlate of protection against COVID-19 is undefined. T cell and B cell  
37 responses are usually used as surrogates of protection.<sup>66</sup> We decided to use a 4-fold rise from  
38 baseline in IgG production following second vaccine dose as the criteria for a successful vaccine  
39 response, as was indicated in the Pfizer study<sup>47</sup>, in order to calculate our sample size. Data from  
40 the Pfizer study submitted to the Food and Drug Administration and published by Walsh *et al.*,  
41 report geometric mean titers that were compared to those from a human SARS-CoV-2  
42 convalescent serum panel as a benchmark. Increased titers were expressed in logarithmic fold  
43 increases.<sup>67</sup> There are currently no national standards for presenting the serology data. Some  
44 groups prefer to report the raw signal values, whereas others normalize data as fold increases.  
45  
46  
47  
48  
49  
50  
51  
52  
53  
54  
55  
56  
57  
58  
59  
60

1  
2  
3 Since individual baseline values will not be available for participants who have already received  
4 their first vaccine dose, one option is to use the cohort baseline data derived from non-vaccinated  
5 participants. Alternatively, we may opt to examine relative titers, or fold-changes, and therefore  
6 baseline data will not actually be required. Since science is continuously evolving, we will use the  
7 definition of a successful vaccine response which is most widely accepted at the time of  
8 publication.  
9  
10  
11  
12  
13  
14  
15  
16  
17  
18  
19

20 The best methodology to match PLWH with the HIV-negative group remains unclear. As  
21 discussed by Wong *et al.*, the ideal comparison group would be individuals who are identical to  
22 HIV-negative adults in all aspects except HIV status<sup>68</sup>. As PLWH have distinct characteristics,  
23 traditional risk factors, lifestyle factors and socioeconomic factors compared to the general  
24 population, the general population may not be the ideal comparison group<sup>68</sup>. Differences include  
25 increased tobacco smoking<sup>69</sup>, substance use<sup>70</sup> and comorbidities<sup>71</sup> amongst PLWH compared to  
26 the general population. However, PLWH also undergo more screening for age-related  
27 comorbidities due to frequent contact with health care providers<sup>68</sup>. We plan to match PLWH  
28 participants with HIV-negative individuals from the SSO study. As previously mentioned, as long  
29 as we ensure there are 20% of individuals with the characteristics of interest in the HIV-negative  
30 and HIV-positive “stable” cohorts, we can compare groups while controlling for these  
31 characteristics via regression.  
32  
33  
34  
35  
36  
37  
38  
39  
40  
41  
42  
43  
44  
45  
46  
47

48 Taken together, the findings from this study will provide valuable insight into COVID-19-vaccine-  
49 induced immunogenicity in important sub-populations of PLWH. HIV-positive persons of older  
50 age, with CD4 counts <350 cells/mm<sup>3</sup> and multimorbidity were not included in the early clinical  
51 trials, yet are most likely to suffer from poor outcomes if infected with COVID-19. These findings  
52  
53  
54  
55  
56  
57  
58  
59  
60

will inform clinical guideline recommendations for PLWH and, in turn, reduce COVID-19-induced morbidity and mortality.

## REFERENCES

1. Gazzola L, Tincati C, Bellistri GM, Monforte A, Marchetti G. The absence of CD4+ T cell count recovery despite receipt of virologically suppressive highly active antiretroviral therapy: clinical risk, immunological gaps, and therapeutic options. *Clin Infect Dis*. 2009;48(3):328-337.
2. Lerner AM, Eisinger RW, Fauci AS. Comorbidities in Persons With HIV: The Lingering Challenge. *JAMA*. 2019.
3. Hsue PY, Deeks SG, Hunt PW. Immunologic basis of cardiovascular disease in HIV-infected adults. *J Infect Dis*. 2012;205 Suppl 3:S375-382.
4. Serrano-Villar S, Sainz T, Lee SA, et al. HIV-infected individuals with low CD4/CD8 ratio despite effective antiretroviral therapy exhibit altered T cell subsets, heightened CD8+ T cell activation, and increased risk of non-AIDS morbidity and mortality. *PLoS Pathog*. 2014;10(5):e1004078.
5. Klein M, Lu Y, DelBalso L, Cote S, Boivin G. Influenza infection is a primary cause of febrile respiratory illness in HIV-infection adults despite vaccination. *Clin Infect Dis*. in press.
6. French N, Gordon SB, Mwalukomo T, et al. A trial of a 7-valent pneumococcal conjugate vaccine in HIV-infected adults. *N Engl J Med*. 2010;362(9):812-822.
7. Glaser JB, Volpe S, Aguirre A, Simpkins H, Schiffman G. Zidovudine improves response to pneumococcal vaccine among persons with AIDS and AIDS-related complex. *J Infect Dis*. 1991;164(4):761-764.
8. Wallace MR, Brandt CJ, Earhart KC, et al. Safety and immunogenicity of an inactivated hepatitis A vaccine among HIV-infected subjects. *Clin Infect Dis*. 2004;39(8):1207-1213.
9. Crum-Cianflone NF, Wilkins K, Lee AW, et al. Long-term durability of immune responses after hepatitis A vaccination among HIV-infected adults. *J Infect Dis*. 2011;203(12):1815-1823.
10. Kemper CA, Haubrich R, Frank I, et al. Safety and immunogenicity of hepatitis A vaccine in human immunodeficiency virus-infected patients: a double-blind, randomized, placebo-controlled trial. *J Infect Dis*. 2003;187(8):1327-1331.
11. Overton ET, Sungkanuparph S, Powderly WG, Seyfried W, Groger RK, Aberg JA. Undetectable plasma HIV RNA load predicts success after hepatitis B vaccination in HIV-infected persons. *Clin Infect Dis*. 2005;41(7):1045-1048.
12. El Chaer F, El Sahly HM. Vaccination in the Adult Patient Infected with HIV: A Review of Vaccine Efficacy and Immunogenicity. *Am J Med*. 2019;132(4):437-446.
13. Tedaldi EM, Baker RK, Moorman AC, et al. Hepatitis A and B vaccination practices for ambulatory patients infected with HIV. *Clin Infect Dis*. 2004;38(10):1478-1484.
14. Staprans SI, Hamilton BL, Follansbee SE, et al. Activation of virus replication after vaccination of HIV-1-infected individuals. *J Exp Med*. 1995;182(6):1727-1737.

15. Amoah S, Mishina M, Praphasiri P, et al. Standard-Dose Intradermal Influenza Vaccine Elicits Cellular Immune Responses Similar to Those of Intramuscular Vaccine in Men With and Those Without HIV Infection. *J Infect Dis.* 2019;220(5):743-751.
16. Kroon FP, van Dissel JT, de Jong JC, Zwinderman K, van Furth R. Antibody response after influenza vaccination in HIV-infected individuals: a consecutive 3-year study. *Vaccine.* 2000;18(26):3040-3049.
17. d'Arminio Monforte A, Bonnet F, Bucher HC, et al. What do the changing patterns of comorbidity burden in people living with HIV mean for long-term management? Perspectives from European HIV cohorts. *HIV Med.* 2020;21 Suppl 2:3-16.
18. Millett GA. New pathogen, same disparities: why COVID-19 and HIV remain prevalent in U.S. communities of colour and implications for ending the HIV epidemic. *J Int AIDS Soc.* 2020;23(11):e25639.
19. Weiser JK, Tie Y, Beer L, Neblett Fanfair R, Shouse RL. Racial/Ethnic and Income Disparities in the Prevalence of Comorbidities that Are Associated With Risk for Severe COVID-19 Among Adults Receiving HIV Care, United States, 2014-2019. *J Acquir Immune Defic Syndr.* 2021;86(3):297-304.
20. R. P. Have COVID-19 vaccines been tested in people with HIV? *NAM AIDSMAP* Accessed online 15 January 2021 from <https://www.aidsmap.com/about-hiv/have-covid-19-vaccines-been-tested-people-hiv>. 2021.
21. Ramasamy MN, Minassian AM, Ewer KJ, et al. Safety and immunogenicity of ChAdOx1 nCoV-19 vaccine administered in a prime-boost regimen in young and old adults (COV002): a single-blind, randomised, controlled, phase 2/3 trial. *Lancet.* 2020.
22. <https://clinicaltrials.gov/ct2/show/NCT04444674?cond=HIV+and+COVID&draw=4&rank=22> Np.
23. <https://www.modernatx.com/sites/default/files/mRNA-1273-P301-Protocol.pdf> MP.
24. (<https://www.jnj.com/coronavirus/ensemble-1-study-protocol>) JaJP.
25. Shinde V, Bhikha S, Hoosain Z, et al. Efficacy of NVX-CoV2373 Covid-19 Vaccine against the B.1.351 Variant. *N Engl J Med.* 2021;384(20):1899-1909.
26. Ruddy JA, Boyarsky BJ, Werbel WA, et al. Safety and antibody response to the first dose of SARS-CoV-2 messenger RNA vaccine in persons with HIV. *AIDS.* 2021.
27. Polack FP, Thomas SJ, Kitchin N, et al. Safety and Efficacy of the BNT162b2 mRNA Covid-19 Vaccine. *N Engl J Med.* 2020.
28. Weiskopf D, Schmitz KS, Raadsen MP, et al. Phenotype and kinetics of SARS-CoV-2-specific T cells in COVID-19 patients with acute respiratory distress syndrome. *Sci Immunol.* 2020;5(48).
29. Zuo J DA, Pearce H et al. Robust SARS-CoV-2-specific T-cell immunity is maintained at 6 months following primary infection. *BioRxiv 2020:20201101362319v1 [Preprint]* [www.biorxiv.org/content/101101/20201101362319v1](http://www.biorxiv.org/content/101101/20201101362319v1). 2020.
30. Sewell HF, Agius RM, Kendrick D, Stewart M. Covid-19 vaccines: delivering protective immunity. *BMJ.* 2020;371:m4838.
31. Deeks SG, Martin JN, Sinclair E, et al. Strong cell-mediated immune responses are associated with the maintenance of low-level viremia in antiretroviral-treated individuals with drug-resistant human immunodeficiency virus type 1. *J Infect Dis.* 2004;189(2):312-321.



- 1
- 2
- 3
- 4 32. Deeks SG, Phillips AN. HIV infection, antiretroviral treatment, ageing, and non-AIDS
- 5 related morbidity. *BMJ*. 2009;338:a3172.
- 6 33. Peng X, Ouyang J, Isnard S, et al. Sharing CD4+ T Cell Loss: When COVID-19 and HIV
- 7 Collide on Immune System. *Front Immunol*. 2020;11:596631.
- 8 34. Jackson LA, Anderson EJ, Roupael NG, et al. An mRNA Vaccine against SARS-CoV-2
- 9 - Preliminary Report. *N Engl J Med*. 2020;383(20):1920-1931.
- 10 35. Pereira B, Xu XN, Akbar AN. Targeting Inflammation and Immunosenescence to
- 11 Improve Vaccine Responses in the Elderly. *Front Immunol*. 2020;11:583019.
- 12 36. Wagner A, Garner-Spitzer E, Jasinska J, et al. Age-related differences in humoral and
- 13 cellular immune responses after primary immunisation: indications for stratified
- 14 vaccination schedules. *Sci Rep*. 2018;8(1):9825.
- 15 37. Wagner A, Weinberger B. Vaccines to Prevent Infectious Diseases in the Older
- 16 Population: Immunological Challenges and Future Perspectives. *Front Immunol*.
- 17 2020;11:717.
- 18 38. Braunstein SL, Lazar R, Wahnich A, Daskalakis DC, Blackstock OJ. COVID-19
- 19 infection among people with HIV in New York City: A population-level analysis of
- 20 linked surveillance data. *Clin Infect Dis*. 2020.
- 21 39. Dandachi D, Geiger G, Montgomery MW, et al. Characteristics, Comorbidities, and
- 22 Outcomes in a Multicenter Registry of Patients with HIV and Coronavirus Disease-19.
- 23 *Clin Infect Dis*. 2020.
- 24 40. Hoffmann C, Casado JL, Harter G, et al. Immune deficiency is a risk factor for severe
- 25 COVID-19 in people living with HIV. *HIV Med*. 2021;22(5):372-378.
- 26 41. Lu W, Mehraj V, Vyboh K, Cao W, Li T, Routy JP. CD4:CD8 ratio as a frontier marker
- 27 for clinical outcome, immune dysfunction and viral reservoir size in virologically
- 28 suppressed HIV-positive patients. *J Int AIDS Soc*. 2015;18:20052.
- 29 42. Nanditha NGA, Paiero A, Tafessu HM, et al. Excess burden of age-associated
- 30 comorbidities among people living with HIV in British Columbia, Canada: a population-
- 31 based cohort study. *BMJ Open*. 2021;11(1):e041734.
- 32 43. Roy Cardinal MH, Durand M, Chartrand-Lefebvre C, et al. Increased carotid artery wall
- 33 stiffness and plaque prevalence in HIV infected patients measured with ultrasound
- 34 elastography. *Eur Radiol*. 2020;30(6):3178-3187.
- 35 44. Triplette M, Justice A, Attia EF, et al. Markers of chronic obstructive pulmonary disease
- 36 are associated with mortality in people living with HIV. *AIDS*. 2018;32(4):487-493.
- 37 45. Gallant J, Hsue PY, Shrey S, Meyer N. Comorbidities Among US Patients With
- 38 Prevalent HIV Infection-A Trend Analysis. *J Infect Dis*. 2017;216(12):1525-1533.
- 39 46. Richardson S, Hirsch JS, Narasimhan M, et al. Presenting Characteristics, Comorbidities,
- 40 and Outcomes Among 5700 Patients Hospitalized With COVID-19 in the New York City
- 41 Area. *JAMA*. 2020;323(20):2052-2059.
- 42 47. Pfizer BioNTech A Phase 1/2/3 placebo-controlled, randomized, observer-blind, dose-
- 43 finding study to evaluate the safety, tolerability, immunogenicity, and efficacy of SARS-
- 44 COV-2 RNA vaccine candidates against COVID-10 in healthy individuals Protocol
- 45 Number C4591001 Accessed online from [www.pfizer.com](http://www.pfizer.com) on January 11, 2021.
- 46 48. Crum-Cianflone NF, Wallace MR. Vaccination in HIV-infected adults. *AIDS Patient*
- 47 *Care STDS*. 2014;28(8):397-410.
- 48 49. Ding S, Laumaea A, Benlarbi M, et al. Antibody Binding to SARS-CoV-2 S
- 49 Glycoprotein Correlates with but Does Not Predict Neutralization. *Viruses*. 2020;12(11).
- 50
- 51
- 52
- 53
- 54
- 55
- 56
- 57
- 58
- 59
- 60

- 1
- 2
- 3
- 4 50. Beaudoin-Bussieres G, Laumaea A, Anand SP, et al. Decline of Humoral Responses
- 5 against SARS-CoV-2 Spike in Convalescent Individuals. *mBio*. 2020;11(5).
- 6 51. Prevost J, Gasser R, Beaudoin-Bussieres G, et al. Cross-Sectional Evaluation of Humoral
- 7 Responses against SARS-CoV-2 Spike. *Cell Rep Med*. 2020;1(7):100126.
- 8 52. Grifoni A, Weiskopf D, Ramirez SI, et al. Targets of T Cell Responses to SARS-CoV-2
- 9 Coronavirus in Humans with COVID-19 Disease and Unexposed Individuals. *Cell*.
- 10 2020;181(7):1489-1501 e1415.
- 11 53. Perreault J, Tremblay T, Fournier MJ, et al. Waning of SARS-CoV-2 RBD antibodies in
- 12 longitudinal convalescent plasma samples within 4 months after symptom onset. *Blood*.
- 13 2020;136(22):2588-2591.
- 14 54. Rocheleau L LG, Fu K, Cote M, Giguere PM, Langlois MA, Pelchat M. Consistent and
- 15 high-frequency identification of an intra-sample genetic variant of SARS-CoV2 with
- 16 elevated fusogenic properties. *Biox*. <https://doi.org/10.1101/2020.12.03.409714>.
- 17 55. Brockman MA, Mwimanzi F, Sang Y, et al. Weak humoral immune reactivity among
- 18 residents of long-term care facilities following one dose of the BNT162b2 mRNA
- 19 COVID-19 vaccine. *medRxiv*. 2021.
- 20 56. Cao Y, Qiu Y, Tu G, Yang C. Single-cell RNA Sequencing in Immunology. *Curr*
- 21 *Genomics*. 2020;21(8):564-575.
- 22 57. Mehraj V, Ramendra R, Isnard S, et al. Circulating (1-->3)-beta-D-glucan Is Associated
- 23 With Immune Activation During Human Immunodeficiency Virus Infection. *Clin Infect*
- 24 *Dis*. 2020;70(2):232-241.
- 25 58. Cook IF. Sexual dimorphism of humoral immunity with human vaccines. *Vaccine*.
- 26 2008;26(29-30):3551-3555.
- 27 59. Cook IF. Sex differences in injection site reactions with human vaccines. *Hum Vaccin*.
- 28 2009;5(7):441-449.
- 29 60. Saadat S, Rikhtegaran Tehrani Z, Logue J, et al. Binding and Neutralization Antibody
- 30 Titers After a Single Vaccine Dose in Health Care Workers Previously Infected With
- 31 SARS-CoV-2. *JAMA*. 2021;325(14):1467-1469.
- 32 61. Blain H, Tuaille E, Gamon L, et al. Spike Antibody Levels of Nursing Home Residents
- 33 With or Without Prior COVID-19 3 Weeks After a Single BNT162b2 Vaccine Dose.
- 34 *JAMA*. 2021.
- 35 62. 2021 hwoc-c-o-dAm.
- 36 63. Kinoshita H, Durkee-Shock J, Jensen-Wachspress M, et al. Robust Antibody and T Cell
- 37 Responses to SARS-CoV-2 in Patients with Antibody Deficiency. *J Clin Immunol*. 2021.
- 38 64. Bajaj V, Gadi N, Spihlman AP, Wu SC, Choi CH, Moulton VR. Aging, Immunity, and
- 39 COVID-19: How Age Influences the Host Immune Response to Coronavirus Infections?
- 40 *Front Physiol*. 2020;11:571416.
- 41 65. Gustafson CE, Kim C, Weyand CM, Goronzy JJ. Influence of immune aging on vaccine
- 42 responses. *J Allergy Clin Immunol*. 2020;145(5):1309-1321.
- 43 66. Poonia B, Kottlilil S. Immune Correlates of COVID-19 Control. *Front Immunol*.
- 44 2020;11:569611.
- 45 67. Walsh EE, Frenck RW, Jr., Falsey AR, et al. Safety and Immunogenicity of Two RNA-
- 46 Based Covid-19 Vaccine Candidates. *N Engl J Med*. 2020;383(25):2439-2450.
- 47 68. Wong C, Althoff K, Gange SJ. Identifying the appropriate comparison group for HIV-
- 48 infected individuals. *Curr Opin HIV AIDS*. 2014;9(4):379-385.
- 49
- 50
- 51
- 52
- 53
- 54
- 55
- 56
- 57
- 58
- 59
- 60

- 1  
2  
3 69. Helleberg M, Afzal S, Kronborg G, et al. Mortality attributable to smoking among HIV-  
4 1-infected individuals: a nationwide, population-based cohort study. *Clin Infect Dis*.  
5 2013;56(5):727-734.  
6  
7 70. Altice FL, Kamarulzaman A, Soriano VV, Schechter M, Friedland GH. Treatment of  
8 medical, psychiatric, and substance-use comorbidities in people infected with HIV who  
9 use drugs. *Lancet*. 2010;376(9738):367-387.  
10  
11 71. Triant VA, Lee H, Hadigan C, Grinspoon SK. Increased acute myocardial infarction rates  
12 and cardiovascular risk factors among patients with human immunodeficiency virus  
13 disease. *J Clin Endocrinol Metab*. 2007;92(7):2506-2512.  
14  
15  
16  
17

### 18 **Authors' contributions**

19  
20 Co-principal investigators of the study are CTC, CLC and AA. CC and CLC conceived the study,  
21 led the proposal and protocol development. CC wrote the first draft of the manuscript. JS is the  
22 biostatistician who provided methodological expertise and performed sample size calculations. All  
23 other authors contributed to protocol development, study design and development of the proposal.  
24  
25 CTC, MAL, MAJ, MO, MB, and ZB designed the laboratory evaluations. MAL will be responsible  
26 for studies on humoral immunity. MAJ will be responsible for flow cytometric studies to define  
27 proportions of immune cells and their subsets, while CTC will be responsible for cytokine  
28 assessment. MAB and ZLB will be responsible for RNA profiling. MAL and MAB will perform  
29 the analysis of antibodies to COVID-19 variants. MO and MAB will perform analyses of T cell  
30 responses to vaccine immunogens. Markers of gut barrier damage, microbial translocation and  
31 CMV IgG titers will be performed by JPR. HLA typing will be performed as necessary for  
32 participants evaluated for T cell responses by MO, ZLB and MB. JS will oversee data analysis  
33 between groups and subgroup analyses. All authors critically reviewed and approved the final  
34 manuscript.  
35  
36  
37  
38  
39  
40  
41  
42  
43  
44  
45  
46  
47  
48  
49  
50  
51

### 52 **Acknowledgements**

1  
2  
3 The authors thank all of the CTN staff who were involved in the planning and preparation of this  
4 study, in addition to the CTN Scientific Review Committee and the Community Advisory Board,  
5  
6 for their expedited review and helpful comments.  
7  
8

9  
10 CTC is supported by a Fonds de recherche du Québec-Santé (FRQS) Junior 2 career award. AB  
11 holds a Canada Research Chair Tier 2 Canada Research Chair (CRC) in sexually transmitted  
12 infection (STI) Prevention. MAL holds a CRC in Molecular Virology and Intrinsic Immunity.  
13  
14 MAJ holds a CRC, Tier 2, in human immunovirology. SW is supported by a Research Chair in  
15 HIV Clinical Care and Aging from the Ontario HIV Treatment Network. DT is supported by a  
16  
17 Tier 2 CRC in HIV Prevention and STI Research. MAB holds a Canada Research Chair, Tier 2,  
18 in viral pathogenesis and immunity. ZLB holds a Scholar Award from the Michael Smith  
19  
20 Foundation for Health Research. JPR holds a Lowenstein Chair in Hematology.  
21  
22  
23  
24  
25  
26  
27  
28  
29  
30

### 31 **Funding**

32 This project is being supported by funding from the Public Health Agency of Canada, through the  
33  
34 Vaccine Surveillance Reference group and the COVID-19 Immunity Task Force (grant number:  
35  
36 N/A) and the CIHR CTN (grant number: N/A).  
37  
38  
39  
40  
41  
42  
43

### 44 **Competing interests**

45  
46  
47 The authors declare that they have no competing interests  
48  
49  
50  
51  
52  
53  
54  
55  
56  
57  
58  
59  
60

For peer review only

**Table 1: Visits and Procedure Schedule**

| Visit number        | 1 <sup>1</sup><br>(Screen) | Vaccine | 2       | Vaccine | 3 <sup>6</sup>       | 4 <sup>6</sup>       | 5 <sup>6</sup>           |
|---------------------|----------------------------|---------|---------|---------|----------------------|----------------------|--------------------------|
| Week Number         | -12 to 0<br>weeks          | 0       | 4 weeks |         | 3 mo after<br>dose 2 | 6 mo after<br>dose 2 | 12 mo<br>after dose<br>2 |
| Window              | -3 mo                      |         |         |         |                      |                      |                          |
| Inclusion/Exclusion | X                          |         | X       |         |                      |                      |                          |
| Informed Consent    | X                          |         |         |         |                      |                      |                          |
| Medical History     | X                          |         |         |         |                      |                      |                          |

|                                         |   |   |   |   |   |   |   |
|-----------------------------------------|---|---|---|---|---|---|---|
| Blood Draw: Immunology <sup>2</sup>     | X |   | X |   | X | X | X |
| Blood Draw: CD4/Viral Load <sup>3</sup> | X |   | X |   | X | X | X |
| Vaccination <sup>4</sup>                |   | X |   | X |   |   |   |
| Participant Diary <sup>5</sup>          |   | X | X | X | X |   |   |
| CITF <sup>7</sup> Questionnaire         | X |   | X |   | X | X | X |
| Adverse Events <sup>8</sup>             |   |   | X |   | X |   |   |
| Concomitant Meds                        | X |   | X |   | X | X | X |

<sup>1</sup>Screening assessment may be performed same day as vaccination but will be completed prior to vaccination.

<sup>2</sup>Immunoglobulin levels flow cytometry and cytokine secretion (immunogenicity measures); Will be collected at each visit. For participants who have already received a vaccine dose prior to study enrolment, “baseline” immunoglobulin levels (i.e., pre-vaccination) may not be available.

<sup>3</sup>Blood work such as CD4 and Viral load can be collected as part of standard of care

<sup>4</sup>Participants will receive the COVID-19 vaccine outside of the study per standard of care as part of their provincial immunization program.

<sup>5</sup>Participants will maintain a diary after vaccination during which they will record their vaccine reactions, oral temperature and any febrile respiratory tract symptoms as well as general changes to health and medications. The diary will be evaluated up to 30 days following each injection.

<sup>6</sup>Visits 3, 4, 5 will be conducted at 3, 6, 12 months after dose 1 respectively, for COVID-19 vaccines administered as a one-dose schedule.

<sup>7</sup>The full CITF questionnaire will be completed at visit 1 and the modified CITF questionnaire will be completed at subsequent visits.

1  
2  
3 <sup>8</sup>Adverse events will only be collected at 7 and 30 days post vaccination and for  
4 participants who receive a vaccine while currently enrolled in the study (i.e. adverse  
5 events will not be collected retrospectively)  
6  
7

8  
9  
10 For participants who develop COVID19-symptoms 14+ days following vaccination.

11  
12 Participants will be asked to complete the COVID-19 Symptom Survey (Supplementary  
13 materials) and to go for a COVID-19 test at their nearest test centre and notify the study  
14 staff of their test result. If positive for COVID-19, the study staff will mail the participant  
15 6 saliva collection kits by courier in order to collect information on SARS-CoV-2  
16 variants  
17  
18

19  
20  
21 Participants who have already received 1 vaccine dose: These individuals may be  
22 enrolled in the study, at any duration of time post first dose, as long as the baseline blood  
23 draw is before the second booster. Visits 1 and 2 will be combined.  
24  
25

26  
27  
28 Participants who have already received 2 vaccine doses: These individuals must be  
29 enrolled in the study within 3 months of their 2<sup>nd</sup> dose. Visits 1 and 3 will be combined  
30 and Visit 2 will not be required. Participants will follow-up at visits 4 and 5.  
31  
32

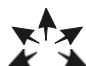

the CTN  
 CTR Canadian  
 HIV Trials Network

le Réseau  
 Réseau canadien  
 pour les essais VIH des IRSC

CTN 328  
 HIV-COV

DATA COLLECTION  
 WORKSHEET

Participant ID

|  |  |  |  |  |  |
|--|--|--|--|--|--|
|  |  |  |  |  |  |
|--|--|--|--|--|--|

Vaccine 1

Vaccine 2

### COVID-19 SYMPTOMS QUESTIONNAIRE

Have you experienced any of the following COVID-19 signs or symptoms?

| Sign                         | Yes | No | If yes, provide date, time |
|------------------------------|-----|----|----------------------------|
| Fever, chills                |     |    |                            |
| Cough                        |     |    |                            |
| Shortness of breath          |     |    |                            |
| Acute loss of smell or taste |     |    |                            |
| Fatigue                      |     |    |                            |
| Headache                     |     |    |                            |
| Muscle aches                 |     |    |                            |
| Nausea/Vomiting/Diarrhea     |     |    |                            |
| General weakness             |     |    |                            |
| Nasal congestion             |     |    |                            |
| Sore throat                  |     |    |                            |



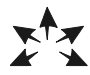

the CTN  
CIHR Canadian  
HIV Trials Network

le Réseau  
Réseau canadien  
pour les essais VIH des IRSC

CTN 328  
HIV-COV

DATA COLLECTION  
WORKSHEET

Participant ID

|  |  |  |  |  |  |
|--|--|--|--|--|--|
|  |  |  |  |  |  |
|--|--|--|--|--|--|

- Vaccine 1
- Vaccine 2

### PARTICIPANT DIARY

Following each injection of COVID-19 vaccine, please indicate whether you experienced any of the following, within 7 days and within 30 days, and indicate the severity. See the Other Signs or Symptoms worksheet for a guide to the severity levels.

|                                                  | Date:  | Date: | Date: | Date: | Date: | Date: | Date: | Date: |                |
|--------------------------------------------------|--------|-------|-------|-------|-------|-------|-------|-------|----------------|
| Sign or Symptom                                  | Day 0* | Day 1 | Day 2 | Day 3 | Day 4 | Day 5 | Day 6 | Day 7 | Within 30 days |
| Pain at injection site                           |        |       |       |       |       |       |       |       |                |
| Redness                                          |        |       |       |       |       |       |       |       |                |
| Swelling                                         |        |       |       |       |       |       |       |       |                |
| Lymphadenopathy/Axillary swelling and tenderness |        |       |       |       |       |       |       |       |                |
| Fatigue                                          |        |       |       |       |       |       |       |       |                |
| Headache                                         |        |       |       |       |       |       |       |       |                |
| Muscle Pain                                      |        |       |       |       |       |       |       |       |                |
| Chills                                           |        |       |       |       |       |       |       |       |                |
| Joint pain                                       |        |       |       |       |       |       |       |       |                |
| Fever                                            |        |       |       |       |       |       |       |       |                |
| Diarrhea                                         |        |       |       |       |       |       |       |       |                |
| Nausea and/or Vomiting                           |        |       |       |       |       |       |       |       |                |

\* Day 0 refers to day vaccine received, Day 1 is the *following day*, and so forth





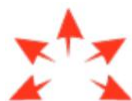

the CTN  
CIHR Canadian  
HIV Trials Network

le Réseau  
Réseau canadien  
pour les essais VIH des IRSC

# CTN 328: HIV-COV

## CITF CDE BASELINE QUESTIONNAIRE

**This version is only administered at Screening**  
*Please answer all questions unless otherwise indicated*

**Participant ID:** \_\_\_\_\_

### Section 1: Demographics

1. Date (DD-MMM-YYYY):

\_\_\_\_ / \_\_\_\_ / \_\_\_\_\_

2. What is your age?

\_\_\_\_\_ YRS    \_\_\_\_\_ MO    OR     Prefer not to answer

3. What was your assigned sex at birth?

- Male  
 Female  
 Prefer to self-describe (specify) \_\_\_\_\_  
 Prefer not to answer

4. What is your sex now?

- Male  
 Female  
 Prefer to self-describe (specify) \_\_\_\_\_  
 Prefer not to answer

1  
2  
3 5. What is your gender (how do you currently self-identify)?  
4

- 5  Male  
6  Female  
7  Non-binary, genderqueer, agender or a similar identity  
8  Two-spirit  
9  Prefer to self-describe (specify) \_\_\_\_\_  
10  Prefer not to answer  
11  
12

13 6. Are you an Indigenous person originating from North America?  
14

15 [If NO or Prefer not to answer, please proceed to Q9](#)

- 16  No  
17  Yes  
18  Prefer not to answer  
19  
20

21 7. Which of the following groups do you belong to? Please select all that apply.  
22

23 [Only answer if Q6 = YES](#)

- 24  First Nations  
25  Inuit  
26  Metis  
27  Non-status First Nations  
28  Other Indigenous (specify) \_\_\_\_\_  
29  Prefer not to answer  
30  
31  
32

33 8. Do you live on reserve?  
34

35 [Only answer if Q7 = First Nations](#)

- 36  Yes  
37  No  
38  Prefer not to answer  
39  
40

41 9. How would you describe your ethnicity or race? Please select all that apply.  
42

43 If you are an Indigenous person and answered YES to Q6, select any other that apply.  
44

- |                                             |                                                            |
|---------------------------------------------|------------------------------------------------------------|
| 45 <input type="checkbox"/> White           | <input type="checkbox"/> West Asian                        |
| 46 <input type="checkbox"/> South Asian     | <input type="checkbox"/> Korean                            |
| 47 <input type="checkbox"/> Chinese         | <input type="checkbox"/> Japanese                          |
| 48 <input type="checkbox"/> Black           | <input type="checkbox"/> Prefer to self-describe (specify) |
| 49 <input type="checkbox"/> Filipino        | _____                                                      |
| 50 <input type="checkbox"/> Latin American  | <input type="checkbox"/> Prefer not to answer              |
| 51 <input type="checkbox"/> Arab            |                                                            |
| 52 <input type="checkbox"/> Southeast Asian |                                                            |
| 53                                          |                                                            |
| 54                                          |                                                            |
| 55                                          |                                                            |
| 56                                          |                                                            |
| 57                                          |                                                            |
| 58                                          |                                                            |

1  
2  
3 10. What are the first three digits of your postal code?  
4

5 \_\_\_\_\_ OR  Prefer not to answer  
6  
7

8  
9 11. What is the highest level of education you have completed?  
10

- 11  Less than high school graduation  
12  High school graduation  
13  Trade certificate, vocational school, or apprenticeship training  
14  Non-university certificate or diploma from a community college, CEGEP  
15  University Bachelor's degree  
16  University graduate degree (Master's, Doctorate, etc.)  
17  Prefer not to answer  
18  
19

20 12. How many people live in your household, including yourself?  
21

22 \_\_\_\_\_ OR  Prefer not to answer  
23  
24

25  
26 13. How many bedrooms are in your household?  
27

28 \_\_\_\_\_ OR  Prefer not to answer  
29  
30

31  
32 14. How many bathrooms are in your household?  
33

34 \_\_\_\_\_ OR  Prefer not to answer  
35  
36

37  
38 **Section 2: COVID-19**

39 15. Do you think you have had COVID-19?  
40

41 [If NO or Prefer not to answer, please proceed to Q18](#)  
42

- 43  No  
44  Yes  
45  Prefer not to answer  
46  
47  
48  
49  
50  
51  
52  
53  
54  
55  
56  
57  
58

1  
2  
3 16. Why do you think you have had COVID-19? Please select all that apply.  
4

5 [Only answer if Q15 = YES](#)

- 6  
7  Symptom review online  
8  Symptom profile  
9  Nasal/throat test result  
10  Health care provider  
11  Contact with case  
12  Other (specify) \_\_\_\_\_  
13  Prefer not to answer  
14  
15

16 17. Were you hospitalized due to COVID-19?  
17

18 [Only answer if Q15 = YES](#)

- 19  
20  No  
21  Yes  
22  Prefer not to answer  
23

24 18. Have you ever been tested for an active COVID-19 infection (using nasopharyngeal/throat swab, saliva, or  
25 gargle test)?  
26

27 [If NO or Prefer not to answer, please proceed to Q21](#)

- 28  
29  No  
30  Yes  
31  Prefer not to answer  
32  
33

34 19. If yes, how many times have you been tested?  
35

36 [Only answer if Q18 = YES](#)

37 \_\_\_\_\_ OR  Prefer not to answer  
38

39 20.1 Answer the following questions about the **first COVID-19 test**, if applicable.  
40

41 20.1.a What was the date of the **first** test?  
42

43 \_\_\_\_\_ DD / \_\_\_\_\_ MO / \_\_\_\_\_ YR  
44

45 20.1.b What was the result of the **first** test?  
46

- 47  Negative  
48  Positive  
49  Don't know  
50  
51  
52  
53  
54  
55  
56  
57  
58

1  
2  
3 20.1.c Did you have any symptoms of COVID when you had this test?  
4

- 5  No  
6  Yes  
7  Don't know  
8

9  
10 20.1.d If yes, what symptoms did you have?  
11

12 [Only answer if Q20.1.c = YES](#)  
13

- 14  Cough  
15  Fever  
16  Shortness of breath  
17  Sore muscles  
18  Headache  
19  Sore throat  
20  Diarrhea  
21  Decreased sense of smell or taste  
22  Other (specify) \_\_\_\_\_  
23  
24  
25

26  
27 20.2 Answer the following questions about the **second COVID-19 test**, if applicable.

28 20.2.a What was the date of the **second** test?  
29

30 \_\_\_\_\_ DD / \_\_\_\_\_ MO / \_\_\_\_\_ YR  
31

32 20.2.b What was the result of the **second** test?  
33

- 34  Negative  
35  Positive  
36  Don't know  
37

38 20.2.c Did you have any symptoms of COVID when you had this test?  
39

- 40  No  
41  Yes  
42  Don't know  
43  
44  
45  
46  
47  
48  
49  
50  
51  
52  
53  
54  
55  
56  
57  
58



1  
2  
3 20.2.d If yes, what symptoms did you have?  
4

5 [Only answer if Q20.2.c = YES](#)  
6

- 7  
8  Cough  
9  Fever  
10  Shortness of breath  
11  Sore muscles  
12  Headache  
13  Sore throat  
14  Diarrhea  
15  Decreased sense of smell or taste  
16  Other (specify) \_\_\_\_\_  
17  
18  
19

20 20.3 Answer the following questions about the **third COVID-19 test**, if applicable.

21 20.3.a What was the date of the **third** test?  
22

23 \_\_\_\_\_ DD / \_\_\_\_\_ MO / \_\_\_\_\_ YR  
24

25 20.3.b What was the result of the **third** test?  
26

- 27  Negative  
28  Positive  
29  Don't know  
30

31 20.3.c Did you have any symptoms of COVID when you had this test?  
32

- 33  No  
34  Yes  
35  Don't know  
36  
37

38 20.3.d If yes, what symptoms did you have?  
39

40 [Only answer if Q20.3.c = YES](#)  
41

- 42  
43  Cough  
44  Fever  
45  Shortness of breath  
46  Sore muscles  
47  Headache  
48  Sore throat  
49  Diarrhea  
50  Decreased sense of smell or taste  
51  Other (specify) \_\_\_\_\_  
52  
53  
54  
55  
56  
57  
58

1  
2  
3 20.4.a Have you **tested positive** for COVID-19 (using nasopharyngeal, throat swab, saliva or gargle test) on a  
4 test that wasn't included the questions above (that is, on the **4th or later test**)?  
5

6 [If NO, please proceed to Q21](#)

- 7  
8  No  
9  Yes  
10

11 20.4.b If yes, what was the date the first time you tested positive?

12  
13 [Only answer if Q20.4.a = YES](#)

14  
15 \_\_\_\_ DD / \_\_\_\_ MO \_\_\_\_ YR  
16  
17

18  
19 **Section 3: Exposure**

20  
21 21.a Have you traveled outside of your home province since **January 2020**?

22 [If NO, please proceed to Q23](#)

- 23  
24  No  
25  Yes  
26  Prefer not to answer  
27

28  
29 21.b If you think you had COVID, did you travel in the 6 months before your symptoms began?

30 [Only answer if Q15 = YES](#)

- 31  
32  No  
33  Yes  
34  Prefer not to answer  
35  
36  
37  
38  
39  
40  
41  
42  
43  
44  
45  
46  
47  
48  
49  
50  
51  
52  
53  
54  
55  
56  
57  
58

22. What province(s)/territory(ies) or country(ies) did you travel to? Select all that apply.

Only answer if Q21.a or Q21.b = YES

- Alberta  
 British Columbia  
 Manitoba  
 New Brunswick  
 Newfoundland and Labrador  
 Northwest Territories  
 Nova Scotia  
 Nunavut  
 Ontario  
 Prince Edward Island  
 Quebec  
 Saskatchewan  
 Yukon

OR  Prefer not to answer

List countries you travelled to (separated by a comma):

---



---



---



---



---

23.a Do you do either paid or unpaid work in an environment where you work in close proximity to other people?

If NO or Prefer not to answer, please proceed to Q24

- No  
 Yes  
 Prefer not to answer

23.b If yes, have you been working in any of the following occupations or worksites in the past year? Please select all that apply.

Only answer if Q23.a = YES

- |                                                                                 |                                                |
|---------------------------------------------------------------------------------|------------------------------------------------|
| <input type="checkbox"/> Hospital or health care facility                       | <input type="checkbox"/> Pharmacy              |
| <input type="checkbox"/> First responder (paramedic/firefighter/police officer) | <input type="checkbox"/> Hairdresser or barber |
| <input type="checkbox"/> Childcare worker                                       | <input type="checkbox"/> Aesthetician          |
| <input type="checkbox"/> Correctional officer                                   | <input type="checkbox"/> Flight attendant      |
| <input type="checkbox"/> Teacher or other school staff                          | <input type="checkbox"/> Factor worker         |
| <input type="checkbox"/> Transit driver                                         | <input type="checkbox"/> Other (specify)       |
| <input type="checkbox"/> Food service industry                                  | <input type="checkbox"/> _____                 |
| <input type="checkbox"/> Grocery store                                          | <input type="checkbox"/> Prefer not to answer  |

1  
2  
3 24.a How many times have you been in a gathering of 10 or more since **March 2020**?

4 \_\_\_\_\_ OR  Prefer not to answer

5  
6  
7 24.b If you think you have had COVID, how many times were you in gatherings of more than 10 people in the 6  
8 months before your symptoms began?

9  
10 [Only answer if Q15 = YES](#)

11 \_\_\_\_\_ OR  Prefer not to answer

12  
13  
14  
15  
16 **Section 4: Health and Health Behaviours**

17 25. Do you currently smoke tobacco?

- 18  
19  No  
20  Yes  
21  Prefer not to answer  
22  
23

24 26. If yes, how often do you smoke tobacco?

25  
26 [Only answer if Q25 = YES](#)

- 27  Less than daily  
28  Daily  
29  
30

31 27. Do you currently use e-cigarettes (vape)?

- 32  No  
33  Yes  
34  Prefer not to answer  
35  
36

37 28. If yes, how often do you use e-cigarettes (vape)?

38  
39 [Only answer if Q27 = YES](#)

- 40  Less than daily  
41  Daily  
42  
43  
44  
45  
46  
47  
48  
49  
50  
51  
52  
53  
54  
55  
56  
57  
58

29. Have you been diagnosed by a physician with any of the following chronic medical conditions? Please provide an answer for each condition.

|    |                               | Yes | No | Don't Know | Prefer not to answer |
|----|-------------------------------|-----|----|------------|----------------------|
| a. | Hypertension                  |     |    |            |                      |
| b. | Diabetes                      |     |    |            |                      |
| c. | Asthma                        |     |    |            |                      |
| d. | Chronic Lung Disease          |     |    |            |                      |
| e. | Chronic Heart Disease         |     |    |            |                      |
| f. | Chronic Kidney Disease        |     |    |            |                      |
| g. | Liver Disease                 |     |    |            |                      |
| h. | Cancer                        |     |    |            |                      |
| i. | Chronic Blood Disorder        |     |    |            |                      |
| j. | Immune Suppressed             |     |    |            |                      |
| k. | Chronic Neurological Disorder |     |    |            |                      |

30. What is your current weight (circle units)?

\_\_\_\_\_ kg / lbs      OR       Prefer not to answer

31. What is your current height?

\_\_\_\_ . \_\_\_\_ m      OR      \_\_\_\_ ft \_\_\_\_ in      OR       Prefer not to answer

32. Do you have a family physician/primary care provider?

- No  
 Yes  
 Don't know  
 Prefer not to answer

33. Do you usually get a flu shot?

- No  
 Yes  
 Prefer not to answer

34. Indicate if, or how often you have done the following since **March 2020**?

|    |                                                                                           | Never | Rarely | Occasionally | Often | Always               | Prefer not to answer |                      |
|----|-------------------------------------------------------------------------------------------|-------|--------|--------------|-------|----------------------|----------------------|----------------------|
| a. | Worn a mask in public places                                                              |       |        |              |       |                      |                      |                      |
| b. | Practiced physical distancing in public places                                            |       |        |              |       |                      |                      |                      |
| c. | Avoided crowded places/gatherings                                                         |       |        |              |       |                      |                      |                      |
| d. | Avoided common greetings (such as a handshake or hug)                                     |       |        |              |       |                      |                      |                      |
|    |                                                                                           | Never | Rarely | Occasionally | Often | Always               | N/A                  | Prefer not to answer |
| e. | Limited contact with people at higher risk (e.g., an elderly relative)                    |       |        |              |       |                      |                      |                      |
|    |                                                                                           | No    | Yes    | N/A          |       | Prefer not to answer |                      |                      |
| f. | Self-isolated because you thought you were infected with COVID-19                         |       |        |              |       |                      |                      |                      |
| g. | Self-quarantined because you may have been exposed to COVID-19, but did not show symptoms |       |        |              |       |                      |                      |                      |

35. **If you think you have had COVID**, have you done the following in the **6 months before your symptoms began?** (indicate how often).

Only answer if Q15 = YES

|    |                                                                                           | Never | Rarely | Occasionally | Often | Always               | N/A | Prefer not to answer |
|----|-------------------------------------------------------------------------------------------|-------|--------|--------------|-------|----------------------|-----|----------------------|
| a. | Worn a mask in public places                                                              |       |        |              |       |                      |     |                      |
| b. | Practiced physical distancing in public places                                            |       |        |              |       |                      |     |                      |
| c. | Avoided crowded places/gatherings                                                         |       |        |              |       |                      |     |                      |
| d. | Avoided common greetings (such as handshake or hug)                                       |       |        |              |       |                      |     |                      |
| e. | Limited contact with people at higher risk (e.g., an elderly relative)                    |       |        |              |       |                      |     |                      |
|    |                                                                                           | No    | Yes    | N/A          |       | Prefer not to answer |     |                      |
| f. | Self-isolated because you thought you were infected with COVID-19                         |       |        |              |       |                      |     |                      |
| g. | Self-quarantined because you may have been exposed to COVID-19, but did not show symptoms |       |        |              |       |                      |     |                      |

### **Section 5: Vaccine**

36. Have you been vaccinated against COVID-19? Answer YES if you have received at least one dose of the COVID-19 vaccine.

[If NO or Prefer not to answer, proceed to Q43](#)

- No
- Yes
- Prefer not to answer

37. How many doses of the COVID-19 vaccine have you received so far?

[Only answer if Q36 = YES](#)

- One
- Two
- More than two

38. When did you receive the **first dose** of the COVID-19 vaccine?

[Only answer if Q36 = YES](#)

\_\_\_\_ DD / \_\_\_\_ MM / \_\_\_\_\_ YR

39. When did you receive the **second dose** of the COVID-19 vaccine?

[Only answer if Q37 = TWO or MORE THAN TWO](#)

\_\_\_\_ DD / \_\_\_\_ MM / \_\_\_\_\_ YR

40. Which vaccine did you receive?

[Only answer if Q36 = YES](#)

- Pfizer and BioNTech mRNA vaccine
- Moderna mRNA vaccine
- AstraZeneca Oxford vaccine
- Other (specify) \_\_\_\_\_
- Janssen (Johnson & Johnson) vaccine
- Don't know
- Prefer not to answer

41. Were you pregnant when you received the vaccine?

[If NO or N/A, proceed to Q43](#)

- No
- Yes
- N/A



42. If yes, what trimester were you in when you received the vaccine?

Only answer if Q41 = YES

- First  
 Second  
 Third

### **Section 6: Cannabis Use**

43. Have you used cannabis (even once) in the past 12 months?

If NO, proceed to the end of this questionnaire

- No  
 Yes

43.a If yes, how do you use cannabis? Please check all that apply.

Only answer if Q43 = YES

|                                    | Yes | No |
|------------------------------------|-----|----|
| Smoked dried plant                 |     |    |
| Vaporized                          |     |    |
| Oil                                |     |    |
| Pills                              |     |    |
| Added to baked good or other foods |     |    |
| Other (specify)                    |     |    |

43.b If you smoke cannabis, please specify how you smoked/took cannabis:

- I do not smoke cannabis (proceed to Q44)

|                                               | Yes | No |
|-----------------------------------------------|-----|----|
| Smoked as joint                               |     |    |
| Smoked as joint mixed with tobacco            |     |    |
| Smoked as pipe                                |     |    |
| Smoked as water pipe (bong)                   |     |    |
| Inhaled using a vaporizer                     |     |    |
| Eaten (e.g. as brownies, cake, cookies, etc.) |     |    |
| Other (specify)                               |     |    |

1  
2  
3 44. Which response **best** describes how often you **currently** use cannabis?  
4

5 [Only answer if Q43 = YES](#)

- 6  
7  Rarely (2-3 times a year)  
8  Monthly  
9  Weekly  
10  Daily  
11  More than once a day  
12

13  
14 45. How many grams per week do you consume?

15 [Only answer if Q43 = YES](#)

- 16  
17  Less than 1 gram  
18  1-5 grams  
19  6-9 grams  
20  10 or more grams  
21  Unknown  
22  
23

24 46. If you smoke cannabis, on average how many joints/cigarettes do you smoke per day?  
25

26 [Only answer if Q43 = YES](#)

27 \_\_\_\_\_ OR  I do not smoke cannabis  
28  
29  
30  
31  
32

33 **END OF QUESTIONNAIRE**  
34  
35  
36  
37  
38  
39  
40  
41  
42  
43  
44  
45  
46  
47  
48  
49  
50  
51  
52  
53  
54  
55  
56  
57  
58  
59  
60

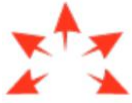

the CTN  
CIHR Canadian  
HIV Trials Network

le Réseau  
Réseau canadien  
pour les essais VIH des IRSC

## CTN 328: HIV-COV

### CITF CDE FOLLOW-UP QUESTIONNAIRE

**This version is administered at Visits 2, 3, 4, 5, and at unscheduled visits**

*Please answer all questions unless otherwise indicated*

**Participant ID:** \_\_\_\_\_

1. Date (DD-MMM-YYYY):

\_\_\_ / \_\_\_ / \_\_\_\_\_

#### **Section 1: COVID-19**

2. Do you think you have had COVID-19 since your last visit?

[If NO or Prefer not to answer, please proceed to Q5](#)

- No  
 Yes  
 Prefer not to answer

3. Why do you think you have had COVID-19 since your last visit? Please select all that apply.

[Only answer if Q2 = YES](#)

- Symptom review online  
 Symptom profile  
 Nasal/throat test result  
 Health care provider  
 Contact with case  
 Other (specify) \_\_\_\_\_  
 Prefer not to answer

1  
2  
3 4. Since your last visit, have you been hospitalized due to COVID-19?  
4

5 [Only answer if Q2 = YES](#)

- 6  
7  No  
8  Yes  
9  Prefer not to answer  
10

11  
12 5. Since your last visit, have you been tested for an active COVID-19 infection (using nasopharyngeal/throat  
13 swab, saliva, or gargle test)?  
14

15 [If NO or Prefer not to answer, please proceed to Q8](#)

- 16  
17  No  
18  Yes  
19  Prefer not to answer  
20

21  
22 6. If yes, how many times have you been tested since your last visit?  
23

24 [Only answer if Q5 = YES](#)

25 \_\_\_\_\_ OR  Prefer not to answer  
26  
27  
28  
29

30 7.1 Answer the following questions about the **first COVID-19 test since your last visit**, if applicable.  
31

32 7.1.a What was the date of the **first** test?  
33

34 \_\_\_\_\_ DD / \_\_\_\_\_ MO / \_\_\_\_\_ YR  
35

36 7.1.b What was the result of the **first** test?  
37

- 38  Negative  
39  Positive  
40  Don't know  
41

42 7.1.c Did you have any symptoms of COVID when you had this test?  
43

- 44  No  
45  Yes  
46  Don't know  
47  
48  
49  
50  
51  
52  
53  
54  
55  
56  
57  
58

1  
2  
3 7.1.d If yes, what symptoms did you have?  
4

5 Only answer if Q7.1.c = YES  
6

- 7  
8  Cough  
9  Fever  
10  Shortness of breath  
11  Sore muscles  
12  Headache  
13  Sore throat  
14  Diarrhea  
15  Decreased sense of smell or taste  
16  Other (specify) \_\_\_\_\_  
17  
18  
19  
20

21  
22 7.2 Answer the following questions about the **second COVID-19 test since your last visit**, if applicable.

23 7.2.a What was the date of the **second** test?  
24

25 \_\_\_\_\_ DD / \_\_\_\_\_ MO / \_\_\_\_\_ YR  
26

27 7.2.b What was the result of the **second** test?  
28

- 29  Negative  
30  Positive  
31  Don't know  
32

33 7.2.c Did you have any symptoms of COVID when you had this test?  
34

- 35  No  
36  Yes  
37  Don't know  
38  
39

40 7.2.d If yes, what symptoms did you have?  
41

42 Only answer if Q7.2.c = YES  
43

- 44  Cough  
45  Fever  
46  Shortness of breath  
47  Sore muscles  
48  Headache  
49  Sore throat  
50  Diarrhea  
51  Decreased sense of smell or taste  
52  Other (specify) \_\_\_\_\_  
53  
54  
55  
56  
57  
58

7.3 Answer the following questions about the **third COVID-19 test since your last visit**, if applicable.

7.3.a What was the date of the **third** test?

\_\_\_ DD / \_\_\_ MO / \_\_\_ YR

7.3.b What was the result of the **third** test?

- Negative  
 Positive  
 Don't know

7.3.c Did you have any symptoms of COVID when you had this test?

- No  
 Yes  
 Don't know

7.3.d If yes, what symptoms did you have?

Only answer if Q7.3.c = YES

- Cough  
 Fever  
 Shortness of breath  
 Sore muscles  
 Headache  
 Sore throat  
 Diarrhea  
 Decreased sense of smell or taste  
 Other (specify) \_\_\_\_\_

7.4.a Have you **tested positive** for COVID-19 since your last visit on a test that wasn't included the questions above (that is, on the **4th or later test**)?

If NO, please proceed to Q8

- No  
 Yes

7.4.b If yes, what was the date the first time you tested positive since your last visit?

Only answer if Q7.4.a = YES

\_\_\_ DD / \_\_\_ MO \_\_\_ YR

**Section 2: Exposure**

8. Have you traveled outside of your home province since your last visit?

- No  
 Yes  
 Prefer not to answer

9.a Since your last visit, have you worked (either paid or unpaid) in an environment where you work in close proximity to other people?

If NO or Prefer not to answer, please proceed to Q10

- No  
 Yes  
 Prefer not to answer

9.b If yes, have you been working in any of the following occupations or worksites since your last visit? Please select all that apply.

Only answer if Q9.a = YES

- Hospital or health care facility  
 First responder (paramedic/firefighter/police officer)  
 Childcare worker  
 Correctional officer  
 Teacher or other school staff  
 Transit driver  
 Food service industry  
 Grocery store  
 Pharmacy  
 Hairdresser or barber  
 Aesthetician  
 Flight attendant  
 Factor worker  
 Other (specify) \_\_\_\_\_  
 Prefer not to answer

10. How many times have you been in a gathering of 10 or more since your last visit?

\_\_\_\_\_ OR  Prefer not to answer

### **Section 3: Vaccine**

11. Have you been vaccinated against COVID-19 since your last visit? Answer YES if you have **received at least one dose of the COVID-19 vaccine since your last visit.**

If NO or Prefer not to answer, proceed to the end of this questionnaire

- No  
 Yes  
 Prefer not to answer

12. How many doses of the COVID-19 vaccine have you received since your last visit?

Only answer if Q11 = YES

- One  
 Two  
 More than two

13. When did you receive the **first dose** of the COVID-19 vaccine since your last visit?

Only answer if Q11= YES

\_\_\_ \_\_\_ DD / \_\_\_ \_\_\_ MM / \_\_\_ \_\_\_ \_\_\_ YR

14. Which vaccine did you receive for this **first dose** since your last visit?

Only answer if Q11= YES

- Pfizer and BioNTech mRNA vaccine  
 Moderna mRNA vaccine  
 AstraZeneca Oxford vaccine  
 Other (specify) \_\_\_\_\_  
 Janssen (Johnson & Johnson) vaccine  
 Don't know  
 Prefer not to answer

15. Were you pregnant when you received this **first dose** since your last visit?

If NO or N/A, proceed to Q17

- No  
 Yes  
 N/A



1  
2  
3 16. If yes, what trimester were you in when you received this **first dose** since your last visit?

4  
5 [Only answer if Q15 =YES](#)

- 6  
7  First  
8  Second  
9  Third  
10

11  
12  
13 17. When did you receive the **second dose** of the COVID-19 vaccine since your last visit?

14  
15 [Only answer if Q12 = TWO or MORE THAN TWO](#)

16  
17 \_\_\_\_ DD / \_\_\_\_ MM / \_\_\_\_ YR  
18

19  
20 18. Which vaccine did you receive for this **second dose** since your last visit?

21  
22 [Only answer if Q12 = TWO or MORE THAN TWO](#)

- 23  
24  Pfizer and BioNTech mRNA vaccine  
25  Moderna mRNA vaccine  
26  AstraZeneca Oxford vaccine  
27  Other (specify) \_\_\_\_\_  
28  Janssen (Johnson & Johnson) vaccine  
29  Don't know  
30  Prefer not to answer  
31  
32

33  
34 19. Were you pregnant when you received this **second dose** since your last visit?

35  
36 [If NO or N/A, proceed to the end of this questionnaire](#)

- 37  
38  No  
39  Yes  
40  N/A  
41  
42

43  
44 20. If yes, what trimester were you in when you received this **second dose** since your last visit?

45  
46 [Only answer if Q19 =YES](#)

- 47  First  
48  Second  
49  Third  
50  
51

52  
53 **END OF QUESTIONNAIRE**  
54

**STROBE 2007 (v4) Statement—Checklist of items that should be included in reports of *cohort studies***

| Section/Topic                | Item # | Recommendation                                                                                                                                                                       | Reported on page #                                          |
|------------------------------|--------|--------------------------------------------------------------------------------------------------------------------------------------------------------------------------------------|-------------------------------------------------------------|
| <b>Title and abstract</b>    | 1      | (a) Indicate the study's design with a commonly used term in the title or the abstract                                                                                               | 1                                                           |
|                              |        | (b) Provide in the abstract an informative and balanced summary of what was done and what was found                                                                                  | 4-5                                                         |
| <b>Introduction</b>          |        |                                                                                                                                                                                      |                                                             |
| Background/rationale         | 2      | Explain the scientific background and rationale for the investigation being reported                                                                                                 | 6-9                                                         |
| Objectives                   | 3      | State specific objectives, including any prespecified hypotheses                                                                                                                     | 9-10                                                        |
| <b>Methods</b>               |        |                                                                                                                                                                                      |                                                             |
| Study design                 | 4      | Present key elements of study design early in the paper                                                                                                                              | 10-11                                                       |
| Setting                      | 5      | Describe the setting, locations, and relevant dates, including periods of recruitment, exposure, follow-up, and data collection                                                      | 10-15, Table 1                                              |
| Participants                 | 6      | (a) Give the eligibility criteria, and the sources and methods of selection of participants. Describe methods of follow-up                                                           | 11-12                                                       |
|                              |        | (b) For matched studies, give matching criteria and number of exposed and unexposed                                                                                                  | N/A (No matching)                                           |
| Variables                    | 7      | Clearly define all outcomes, exposures, predictors, potential confounders, and effect modifiers. Give diagnostic criteria, if applicable                                             | 15-17                                                       |
| Data sources/<br>measurement | 8*     | For each variable of interest, give sources of data and details of methods of assessment (measurement). Describe comparability of assessment methods if there is more than one group | 11 (SSO cohort-same time points and methods). 12-13, 15-16, |
| Bias                         | 9      | Describe any efforts to address potential sources of bias                                                                                                                            | 14-15, 22-26 (limitations discussed)                        |
| Study size                   | 10     | Explain how the study size was arrived at                                                                                                                                            | 14                                                          |
| Quantitative variables       | 11     | Explain how quantitative variables were handled in the analyses. If applicable, describe which groupings were chosen and why                                                         | 19                                                          |
| Statistical methods          | 12     | (a) Describe all statistical methods, including those used to control for confounding                                                                                                | 19                                                          |
|                              |        | (b) Describe any methods used to examine subgroups and interactions                                                                                                                  | 19                                                          |

|                          |     |                                                                                                                                                                                                              |                                               |
|--------------------------|-----|--------------------------------------------------------------------------------------------------------------------------------------------------------------------------------------------------------------|-----------------------------------------------|
|                          |     | (c) Explain how missing data were addressed                                                                                                                                                                  | 19                                            |
|                          |     | (d) If applicable, explain how loss to follow-up was addressed                                                                                                                                               | 19                                            |
|                          |     | (e) Describe any sensitivity analyses                                                                                                                                                                        | 19                                            |
| <b>Results</b>           |     |                                                                                                                                                                                                              | Protocol paper thus results not yet available |
| Participants             | 13* | (a) Report numbers of individuals at each stage of study—eg numbers potentially eligible, examined for eligibility, confirmed eligible, included in the study, completing follow-up, and analysed            |                                               |
|                          |     | (b) Give reasons for non-participation at each stage                                                                                                                                                         |                                               |
|                          |     | (c) Consider use of a flow diagram                                                                                                                                                                           |                                               |
| Descriptive data         | 14* | (a) Give characteristics of study participants (eg demographic, clinical, social) and information on exposures and potential confounders                                                                     |                                               |
|                          |     | (b) Indicate number of participants with missing data for each variable of interest                                                                                                                          |                                               |
|                          |     | (c) Summarise follow-up time (eg, average and total amount)                                                                                                                                                  |                                               |
| Outcome data             | 15* | Report numbers of outcome events or summary measures over time                                                                                                                                               |                                               |
| Main results             | 16  | (a) Give unadjusted estimates and, if applicable, confounder-adjusted estimates and their precision (eg, 95% confidence interval). Make clear which confounders were adjusted for and why they were included |                                               |
|                          |     | (b) Report category boundaries when continuous variables were categorized                                                                                                                                    |                                               |
|                          |     | (c) If relevant, consider translating estimates of relative risk into absolute risk for a meaningful time period                                                                                             |                                               |
| Other analyses           | 17  | Report other analyses done—eg analyses of subgroups and interactions, and sensitivity analyses                                                                                                               |                                               |
| <b>Discussion</b>        |     |                                                                                                                                                                                                              |                                               |
| Key results              | 18  | Summarise key results with reference to study objectives                                                                                                                                                     | N/A protocol paper results not yet available  |
| <b>Limitations</b>       |     |                                                                                                                                                                                                              |                                               |
| Interpretation           | 20  | Give a cautious overall interpretation of results considering objectives, limitations, multiplicity of analyses, results from similar studies, and other relevant evidence                                   | 22-26                                         |
| Generalisability         | 21  | Discuss the generalisability (external validity) of the study results                                                                                                                                        | 22-26                                         |
| <b>Other information</b> |     |                                                                                                                                                                                                              |                                               |
| Funding                  | 22  | Give the source of funding and the role of the funders for the present study and, if applicable, for the original study on                                                                                   | 32                                            |

|  |                                    |  |
|--|------------------------------------|--|
|  | which the present article is based |  |
|--|------------------------------------|--|

\*Give information separately for cases and controls in case-control studies and, if applicable, for exposed and unexposed groups in cohort and cross-sectional studies.

**Note:** An Explanation and Elaboration article discusses each checklist item and gives methodological background and published examples of transparent reporting. The STROBE checklist is best used in conjunction with this article (freely available on the Web sites of PLoS Medicine at <http://www.plosmedicine.org/>, Annals of Internal Medicine at <http://www.annals.org/>, and Epidemiology at <http://www.epidem.com/>). Information on the STROBE Initiative is available at [www.strobe-statement.org](http://www.strobe-statement.org).

For peer review only

# BMJ Open

## CTN 328: Immunogenicity outcomes in people living with HIV in Canada following vaccination for COVID-19 (HIV-COV)-Protocol for an observational cohort study

|                               |                                                                                                                                                                                                                                                                                                                                                                                                                                                                                                                                                                                                                                                                                                                                                                                                                                                                                                                                                                                                                                                                                                                                                                                                                                                                                                                                                                                                                                                                                                                                                                                                                                                                                                                                                                                                                                                                                                                                                                                                                                                                                                                                                     |
|-------------------------------|-----------------------------------------------------------------------------------------------------------------------------------------------------------------------------------------------------------------------------------------------------------------------------------------------------------------------------------------------------------------------------------------------------------------------------------------------------------------------------------------------------------------------------------------------------------------------------------------------------------------------------------------------------------------------------------------------------------------------------------------------------------------------------------------------------------------------------------------------------------------------------------------------------------------------------------------------------------------------------------------------------------------------------------------------------------------------------------------------------------------------------------------------------------------------------------------------------------------------------------------------------------------------------------------------------------------------------------------------------------------------------------------------------------------------------------------------------------------------------------------------------------------------------------------------------------------------------------------------------------------------------------------------------------------------------------------------------------------------------------------------------------------------------------------------------------------------------------------------------------------------------------------------------------------------------------------------------------------------------------------------------------------------------------------------------------------------------------------------------------------------------------------------------|
| Journal:                      | <i>BMJ Open</i>                                                                                                                                                                                                                                                                                                                                                                                                                                                                                                                                                                                                                                                                                                                                                                                                                                                                                                                                                                                                                                                                                                                                                                                                                                                                                                                                                                                                                                                                                                                                                                                                                                                                                                                                                                                                                                                                                                                                                                                                                                                                                                                                     |
| Manuscript ID                 | bmjopen-2021-054208.R1                                                                                                                                                                                                                                                                                                                                                                                                                                                                                                                                                                                                                                                                                                                                                                                                                                                                                                                                                                                                                                                                                                                                                                                                                                                                                                                                                                                                                                                                                                                                                                                                                                                                                                                                                                                                                                                                                                                                                                                                                                                                                                                              |
| Article Type:                 | Protocol                                                                                                                                                                                                                                                                                                                                                                                                                                                                                                                                                                                                                                                                                                                                                                                                                                                                                                                                                                                                                                                                                                                                                                                                                                                                                                                                                                                                                                                                                                                                                                                                                                                                                                                                                                                                                                                                                                                                                                                                                                                                                                                                            |
| Date Submitted by the Author: | 14-Oct-2021                                                                                                                                                                                                                                                                                                                                                                                                                                                                                                                                                                                                                                                                                                                                                                                                                                                                                                                                                                                                                                                                                                                                                                                                                                                                                                                                                                                                                                                                                                                                                                                                                                                                                                                                                                                                                                                                                                                                                                                                                                                                                                                                         |
| Complete List of Authors:     | <p>Costiniuk, Cecilia T.; McGill University, Chronic Viral Illness Service<br/> Singer, Joel; Canadian Institutes of Health Research Canadian HIV Trials Network; School of Population and Public Health, University of British Columbia, Vancouver, BC, Canada<br/> Langlois, Marc-Andre; University of Ottawa, Biochemistry, Microbiology and Immunology<br/> Kulic, Iva; CIHR Canadian HIV Trials Network<br/> Needham, Judy; Canadian Institutes of Health Research Canadian HIV Trials Network<br/> Burchell, Ann; Li Ka Shing Knowledge Institute, St. Michael's Hospital, Unity Health Toronto, Department of Family and Community Medicine and Centre for Research on Inner City Health; University of Toronto Faculty of Medicine, Department of Family and Community Medicine<br/> Jenabian, Mohammad-Ali; Universite du Quebec a Montreal, Biological Sciences<br/> Walmsley, Sharon; Toronto General Hospital<br/> Ostrowski, Mario; University of Toronto, Immunology; St. Michael's Hospital<br/> Kovacs, Colin; Maple Leaf Medical Clinic<br/> Tan, Darrell; University of Toronto, Department of Medicine, Division of Infectious Diseases; St Michael's Hospital, MAP centre for Urban Health Solutions<br/> Harris, Marianne; BC Centre for Excellence in HIV/AIDS<br/> Hull, Mark; BC Centre for Excellence in HIV/AIDS<br/> Brumme, Zabrina; BC Centre for Excellence in HIV/AIDS; Simon Fraser University, Faculty of Health Sciences<br/> Brockman, Mark; Simon Fraser University, Faculty of Health Sciences; BC Centre for Excellence in HIV/AIDS<br/> Margolese, Shari; CIHR Canadian HIV Trials Network<br/> Mandarino, Enrico; Canadian Institutes of Health Research Canadian HIV Trials Network, Community Advisory<br/> Angel, Jonathan; University of Ottawa, The Ottawa Hospital<br/> Routy, Jean-Pierre; Research Institute of the McGill University Health Centre, Medicine<br/> Anis, Aslam; St. Paul's hospital, Centre for Health Evaluation &amp; Outcome Sciences; University of British Columbia, School of Population and Public Health<br/> Cooper, Curtis; The Ottawa Hospital, Infectious Diseases;</p> |

1  
2  
3  
4  
5  
6  
7  
8  
9  
10  
11  
12  
13  
14  
15  
16  
17  
18  
19  
20  
21  
22  
23  
24  
25  
26  
27  
28  
29  
30  
31  
32  
33  
34  
35  
36  
37  
38  
39  
40  
41  
42  
43  
44  
45  
46  
47  
48  
49  
50  
51  
52  
53  
54  
55  
56  
57  
58  
59  
60

|                                  |                                                                               |
|----------------------------------|-------------------------------------------------------------------------------|
| <b>Primary Subject Heading</b> : | HIV/AIDS                                                                      |
| Secondary Subject Heading:       | Immunology (including allergy), Infectious diseases, Patient-centred medicine |
| Keywords:                        | HIV & AIDS < INFECTIOUS DISEASES, COVID-19, IMMUNOLOGY, VIROLOGY              |
|                                  |                                                                               |

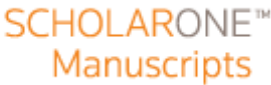

## PROTOCOL

### **CTN 328: Immunogenicity outcomes in people living with HIV in Canada following vaccination for COVID-19 (HIV-COV)-Protocol for an observational cohort study**

Cecilia T. Costiniuk<sup>1-3</sup>, Joel Singer<sup>4-6</sup>, Marc-André Langlois<sup>7</sup>, Iva Kulic<sup>5-6</sup>, Judy Needham<sup>5-6</sup>, Ann N. Burchell<sup>8</sup>, Mohammad-Ali Jenabian<sup>9,3</sup>, Sharon L. Walmsley<sup>10</sup>, Mario A. Ostrowski<sup>11</sup>, Colin M. Kovacs<sup>12</sup>, Darrell H.S. Tan<sup>10,13-14</sup>, Marianne Harris<sup>15</sup>, Mark W. Hull<sup>15</sup>, Zabrina L. Brumme<sup>15,16</sup>, Mark A. Brockman<sup>15-17</sup>, Shari Margolese<sup>5</sup>, Enrico Mandarino<sup>5</sup>, Jonathan B. Angel<sup>7,18</sup>, Jean-Pierre Routy<sup>1,2,19</sup>, Aslam H. Anis<sup>5-7</sup>, Curtis L. Cooper<sup>19</sup>

<sup>1</sup>Division of Infectious Diseases/Chronic Viral Illness Service, McGill University Health Centre, Royal Victoria Hospital: Glen Site; 1001 boulevard Decarie, Montreal, Quebec, Canada (Emails: [Cecilia.costiniuk@mcgill.ca](mailto:Cecilia.costiniuk@mcgill.ca); [jean-pierre.routy@mcgill.ca](mailto:jean-pierre.routy@mcgill.ca))

<sup>2</sup>Infectious Diseases and Immunity in Global Health Research Institute of McGill University Health Centre, 1001 boulevard Decarie, Montreal, Quebec, Canada

<sup>3</sup>Department of Microbiology and Immunology, McGill University, Montreal, Quebec, Canada

<sup>4</sup>School of Population and Public Health, University of British Columbia, Vancouver, British Columbia, Canada. (Email: [jsinger@hivnet.ubc.ca](mailto:jsinger@hivnet.ubc.ca); [ikulic@cheos.ubc.ca](mailto:ikulic@cheos.ubc.ca); [jneedham@cheos.ubc.ca](mailto:jneedham@cheos.ubc.ca))

<sup>5</sup>Canadian HIV Trials Network, Vancouver, British Columbia, Canada (Emails: [shari.margolese@gmail.com](mailto:shari.margolese@gmail.com); [emandarino@rogers.com](mailto:emandarino@rogers.com); [aslam.anis@ubc.ca](mailto:aslam.anis@ubc.ca))

1  
2  
3 <sup>6</sup>Centre for Health Evaluation and Outcome Sciences, St. Paul's Hospital, Vancouver, British  
4  
5 Columbia, Canada  
6

7  
8 <sup>7</sup>Department of Biochemistry, Microbiology and Immunology, University of Ottawa, Ottawa,  
9  
10 Ontario Canada (Email: [langlois@uottawa.ca](mailto:langlois@uottawa.ca))  
11

12  
13 <sup>8</sup>Department of Family and Community Medicine, St Michael's Hospital, Unity Health Toronto  
14  
15 and Dalla Lana School of Public Health, University of Toronto, Toronto, Ontario, Canada (Email:  
16  
17 [ann.burchell@utoronto.ca](mailto:ann.burchell@utoronto.ca))  
18

19  
20 <sup>9</sup>Department of Biological Sciences, Université du Québec à Montréal, Montreal, QC, Canada  
21  
22 Canadian Institutes of Health Research Canadian HIV Trials Network, Vancouver, British  
23  
24 Columbia, Canada. (Email: [jenabian.mohammad-ali@uqam.ca](mailto:jenabian.mohammad-ali@uqam.ca))  
25

26  
27 <sup>10</sup>Department of Medicine, Division of Infectious Diseases, University of Toronto, Toronto,  
28  
29 Ontario (Email: [sharon.walmsley@uhn.ca](mailto:sharon.walmsley@uhn.ca); [darrell.tan@gmail.com](mailto:darrell.tan@gmail.com))  
30

31  
32 <sup>11</sup>Clinical Sciences Division and Department of Immunology, University of Toronto, Li Ka Shing  
33  
34 Knowledge Institute, St. Michael's Hospital, Toronto, Ontario, Canada (Email:  
35  
36 [mario.ostrowski@gmail.com](mailto:mario.ostrowski@gmail.com))  
37

38  
39 <sup>12</sup>Maple Leaf Medical Clinic, Toronto, Ontario, Canada (Email: [ckovacs@mlmedical.com](mailto:ckovacs@mlmedical.com))

40  
41 <sup>13</sup>MAP Centre for Urban Health Solutions, St Michael's Hospital, Toronto, Ontario, Canada

42  
43 <sup>14</sup>Institute of Public Health Policy, Management and Evaluation, Dalla Lana School of Public  
44  
45 Health, University of Toronto, Ontario, Canada  
46

47  
48 <sup>15</sup>British Columbia Centre for Excellence in HIV/AIDS, Vancouver, British Columbia, Canada  
49  
50 (Emails: [mhull@bccfe.ca](mailto:mhull@bccfe.ca); [mharris@bccfe.ca](mailto:mharris@bccfe.ca))  
51

52  
53 <sup>16</sup>Faculty of Health Sciences, Simon Fraser University, Burnaby, British Columbia, Canada  
54  
55 (Email: [zbrumme@bccfe.ca](mailto:zbrumme@bccfe.ca); [mark\\_brockman@sfu.ca](mailto:mark_brockman@sfu.ca))  
56  
57  
58  
59



1  
2  
3 <sup>17</sup>Department of Molecular Biology and Biochemistry, Faculty of Science, Simon Fraser  
4 University, Burnaby, British Columbia, Canada  
5

6  
7  
8 <sup>18</sup>Department of Medicine, Division of Infectious Diseases, The Ottawa Hospital and the Ottawa  
9 Hospital Research Institute, Ottawa, Ontario, Canada ([jangel@ohri.ca](mailto:jangel@ohri.ca); [ccooper@toh.ca](mailto:ccooper@toh.ca))  
10

11  
12 <sup>19</sup>Division of Hematology, Department of Medicine, McGill University Health Centre, Montreal,  
13 Quebec, Canada  
14

15  
16  
17 **Word Count:** 5,349  
18

19  
20 **Correspondence:** Cecilia T. Costiniuk, MD FRCPC, Division of Infectious Diseases and Chronic  
21 Viral Illness Service, Research Institute of the McGill University Health Centre, 1001 boulevard  
22 Decarie, Room EM2.3226, Montreal (QC) Canada, H3A 3J1, Tel: 514-934-1934 ext. 76195; Fax  
23 514-843-2209; Email: [cecilia.costiniuk@mcgill.ca](mailto:cecilia.costiniuk@mcgill.ca)  
24  
25  
26  
27  
28  
29  
30  
31  
32  
33  
34  
35  
36  
37  
38  
39  
40  
41  
42  
43  
44  
45  
46  
47  
48  
49  
50  
51  
52  
53  
54  
55  
56  
57  
58  
59  
60

## ABSTRACT

**Introduction:** Most existing vaccines require higher or additional doses or adjuvants to provide similar protection for people living with HIV (PLWH) compared to HIV-uninfected individuals. Additional research is necessary to inform COVID-19 vaccine use in PLWH.

**Methods and analysis:** This multi-centred observational Canadian cohort study will enroll 400 PLWH aged  $\geq 16$  years from Montreal, Ottawa, Toronto and Vancouver. Subpopulations of PLWH of interest will include: 1)  $>55$  years of age 2) CD4 counts  $<350$  cells/mm<sup>3</sup> 3) multimorbidity ( $\geq 2$  comorbidities) and 4) “stable” or “reference” PLWH (CD4 T cells  $\geq 350$  cells/mm<sup>3</sup>, suppressed viral load for  $\geq 6$  months and  $\leq 1$  comorbidity). Data for 1000 HIV-negative controls will be obtained via a parallel cohort study, (Stop the Spread Ottawa (SSO), using similar time points and methods. Participants receiving  $\geq 1$  COVID-19 vaccine will attend 5 visits: pre-vaccination; 1 month following the first vaccine dose; and at 3, 6 and 12 months following the second vaccine dose. The primary endpoint will be the percentage of PLWH with COVID-19-specific antibodies at 6 months following the second vaccine dose. Humoral and cell-mediated immune responses, and the interplay between T cell phenotypes and inflammatory markers, will be described. Regression techniques will be used to compare COVID-19-specific immune responses to determine whether there are differences between the “unstable” (CD4 $<350$ ) PLWH group, the stable PLWH cohort and the HIV-negative controls, adjusting for factors believed to be associated with immune response. Unadjusted analyses will reveal whether there are differences driving factors associated with group membership.

**Ethics and Dissemination:** Research ethics boards at all participating institutions have granted ethics approval for this study. Written informed consent will be obtained from all study participants

1  
2  
3 prior to enrolment. The findings will inform the design of future COVID-19 clinical trials, dosing  
4 strategies aimed to improve immune responses and guideline development for PLWH.  
5  
6  
7

8 **Trial registration:** [clinicaltrials.gov NCT04894448](https://clinicaltrials.gov/ct2/show/study/NCT04894448)  
9

10  
11 **Keywords:** HIV; COVID-19; observational study; COVID-19 vaccines; vaccine immunogenicity  
12  
13  
14  
15  
16  
17  
18

### 19 **Strengths and Limitations of this study**

- 20  
21 • The largest and most comprehensive immunogenicity study in people living with HIV in  
22  
23  
24  
25  
26  
27  
28  
29  
30  
31  
32  
33  
34  
35  
36  
37  
38  
39  
40  
41  
42  
43  
44  
45  
46  
47  
48  
49  
50  
51  
52  
53  
54  
55  
56  
57  
58  
59  
60  
• Canada receiving COVID-19 vaccination
- Emphasis on recruiting participants frequently excluded from pharmaceutical company-  
sponsored trials and those most likely to have poor outcomes following COVID-19  
infection (including individuals of older age, immune non-responders and persons with  
multimorbidity)
- Assays used will enable differentiation between individuals with immunity from natural  
COVID-19 infection vs. vaccine-induced immunity, in addition to detection of immunity  
towards key variants of concern (VOCs)
- Involvement of community members from study conception to protocol development and  
study implementation
- Limitations include relatively late study start, recruitment restricted to major urban centres  
and variations in timing between vaccine doses amongst participants

## BACKGROUND

In Canada today, an estimated 67,000 people are living with HIV (PLWH), 30% of whom are immune non-responders,<sup>1</sup> defined as achieving undetectable HIV viral levels without robust CD4 T cell count recovery (<350 cells/mm<sup>3</sup>). Even with fully suppressed viral load on antiretroviral therapy (ART), chronic HIV infection is characterized by a low-grade elevation in pro-inflammatory and procoagulant biomarkers linked with higher mortality<sup>2-4</sup>. Poor immunogenicity to common vaccines, including influenza<sup>5</sup>, pneumococcal<sup>6,7</sup>, meningococcal<sup>6,7</sup> and hepatitis A<sup>8-10</sup> and B vaccines,<sup>11-13</sup> is well-documented in PLWH with low CD4 T cell counts (<200 cells/mm<sup>3</sup>) and unsuppressed viral loads<sup>14-16</sup>. PLWH face other intersecting vulnerabilities that increase their risk of SARS-CoV-2 acquisition and symptomatic/severe COVID-19; they commonly belong to low socioeconomic or racialized groups disproportionately affected by COVID-19 and have higher rates of risk factors for severe COVID-19 disease (e.g., multiple chronic comorbidities).<sup>17-19</sup> Yet, this priority population has been understudied in COVID-19 vaccine clinical trials.<sup>3, 20</sup> Most HIV seropositive participants enrolled in COVID-19 vaccine trials had normal CD4 T cell counts (>500

1  
2  
3  
4 cells/mm<sup>3</sup>) and few comorbidities.<sup>21,22</sup> As such, the immunogenicity results may not represent the  
5  
6  
7 wide spectrum of PLWH who are followed in Canadian centres today.  
8  
9

10  
11  
12  
13  
14 For the AstraZeneca/Oxford COVID-19 vaccine trial (ChAdOx1, n=160 PLWH) inclusion criteria  
15  
16  
17 specified younger age (<55 years old) and high CD4 T cell count (>350 cells/mm<sup>3</sup>) while  
18  
19  
20 excluding medical comorbidities (e.g., heart, kidney, liver, respiratory diseases etc.).<sup>21</sup> The data  
21  
22  
23 obtained from PLWH were not included in the primary publication.<sup>21</sup> The Moderna trial included  
24  
25  
26 HIV-positive participants (n=176 PLWH) with CD4 T cell count  $\geq 350$  cells/mm<sup>3</sup> and an  
27  
28  
29 undetectable HIV viral load within the past year.<sup>23</sup> COVID-19 infection developed in 11 PLWH  
30  
31  
32 who received placebo but none who received the Moderna vaccine. The Johnson and Johnson trial  
33  
34  
35 (n=1218 PLWH) included participants with “stable/well-controlled HIV infection” (defined as  
36  
37  
38 CD4 T cell counts  $\geq 300$  cells/ $\mu$ L within 6 months prior to screening and documented HIV viral  
39  
40  
41 load <50 copies/mL within 6 months prior to screening) but excluded participants with ongoing  
42  
43  
44 and progressive comorbidities associated with HIV infection.<sup>24</sup> COVID-19 infection developed in  
45  
46  
47  
48 2 vaccinated PLWH and 4 PLWH given placebo. The Novavax trial, conducted in South Africa,  
49  
50  
51  
52  
53  
54 excluded PLWH with chronic cardiovascular disease, gastrointestinal disease, liver disease, renal  
55  
56  
57  
58  
59  
60

1  
2  
3 disease, endocrine disorder and neurological illness, as well as participants with very high body  
4  
5  
6 mass index ( $\geq 40$  Kg/m<sup>2</sup>).<sup>22</sup> As reported by Vivek *et al.* (2021), efficacy of the NVX-CoV2373  
7  
8  
9  
10 COVID-19 vaccine against the B.1.351 variant was examined in 1,857 individuals in South Africa,  
11  
12  
13 of whom 30% (500 individuals) had HIV infection<sup>25</sup>. The vaccine efficacy estimate in baseline  
14  
15  
16 seronegative HIV-negative participants was 52.2% (95% confidence interval: -24.8 to 81.7).  
17  
18  
19 During the first 60 days of follow-up, the incidence of Covid-19 in HIV-negative placebo  
20  
21  
22 participants (5.3% [95% CI: 4.3 to 6.6]) was comparable to the incidence in PLWH placebo  
23  
24  
25 participants with HIV (5.2% [95% CI: 3.6 to 7.2])<sup>26</sup>. Among HIV-negative participants, there were  
26  
27  
28 four and two cases of symptomatic Covid-19 among NVX-CoV2373 and placebo recipients,  
29  
30  
31 respectively (N<109 in each group)<sup>26</sup>. No cases were observed in the baseline HIV-positive  
32  
33  
34 population (N<33 in each group)<sup>26</sup>. Among 94% of participants without HIV, vaccine efficacy was  
35  
36  
37 60.1%. The study was not powered to detect efficacy in the small population of PLWH<sup>26</sup>.  
38  
39  
40

41 While several other trials included PLWH, they excluded their data from primary  
42  
43  
44 publication<sup>20,21,27</sup>. In a recent report by Ruddy *et al.*(2021) which examined COVID-19 antibody  
45  
46  
47 response in 12 PLWH with a median of 21 days (interquartile range 17-27) following the first dose  
48  
49  
50 of mRNA vaccine (50% Moderna and 50% Pfizer), antibodies were detected in all participants  
51  
52  
53 although lower levels were observed in persons with lower CD4 T cell counts<sup>26</sup>. In this study, all  
54  
55  
56  
57  
58  
59  
60

1  
2  
3  
4 12 individuals were male, 8% were non-white, all had been on ART  $\geq$ 6 months and 92% had an  
5  
6  
7 undetectable HIV viral load. Two individuals had a CD4 T cell count below 200 cell/mm<sup>3</sup>.<sup>26</sup>  
8  
9

10 We lack robust data on vaccine immunogenicity and immune response durability in  
11  
12 subpopulations of PLWH. No evidence is available on the durability of immunogenicity in PLWH  
13  
14 beyond 3 months following vaccination. Since the hallmark of HIV infection is a reduced number  
15  
16 and function of CD4 T cells, and cell-mediated immunity has emerged as a critical aspect of the  
17  
18 COVID-19 immune response,<sup>28,29,30</sup> it is critical to characterize cellular immune and cytotoxic T  
19  
20 cell responses to COVID-19 vaccination.<sup>31-33</sup>  
21  
22  
23  
24  
25  
26  
27

28 Given that inflammatory markers may influence immune cell activation status and shift cell  
29  
30 profiles towards either Th1 or Th2 responses, impacting vaccine-elicited immune response<sup>34</sup>,  
31  
32 understanding the interplay between immune activation and dysfunction is also important. To  
33  
34 address this need, we are establishing a pan-Canadian prospective cohort of PLWH receiving  
35  
36 COVID-19 vaccines to assess humoral and cellular immunogenicity and to describe the  
37  
38 inflammatory milieu in this context. Safety and tolerability of COVID-19 vaccines in this cohort  
39  
40 of PLWH will also be captured. Of note, COVID-19 vaccines currently approved for use in  
41  
42 Canada include those manufactured by Pfizer, Moderna, AstraZeneca and Janssen (Johnston &  
43  
44 Johnston) ([https://www.canada.ca/en/health-canada/services/drugs-health-products/covid19-](https://www.canada.ca/en/health-canada/services/drugs-health-products/covid19-industry/drugs-vaccines-treatments/authorization/list-drugs.html)  
45  
46 industry/drugs-vaccines-treatments/authorization/list-drugs.html). Since the beginning of the  
47  
48 vaccine roll-out Pfizer and Moderna vaccines were administered most often as they were the first  
49  
50  
51  
52  
53  
54  
55  
56  
57  
58  
59  
60

1  
2  
3 to gain approval by Health Canada. Although approved, due to concerns associated with cerebral  
4 venous sinus thrombosis and vaccine-induced immune thrombotic thrombocytopenia, use of the  
5 AstraZeneca COVID-19 vaccine has been restricted in some provinces.  
6  
7  
8  
9  
10

### 11 12 13 **Study Objectives:**

#### 14 15 16 Primary objective:

17  
18 To evaluate the immunogenicity of COVID-19 vaccination in PLWH, by specific immunoglobulin  
19 G antibody enzyme-linked immunosorbent assay (ELISA), at 6 months following 2<sup>nd</sup> vaccine dose.  
20  
21  
22

#### 23 24 Secondary objectives:

25  
26  
27 1) To assess neutralization capacity of COVID-19-specific IgG at 6 months following 2<sup>nd</sup> vaccine  
28 dose.  
29

30  
31  
32 2) To assess the durability of COVID-19-specific IgG response in PLWH at 12 months following  
33 vaccination.  
34

35  
36  
37 3) To examine changes in the proportion and activation phenotype of CD4 T cells, CD8 T cells, B  
38 cells, natural killer cells and monocytes, including gene expression and cytokine production, pre-  
39 and post-COVID-19 vaccination at 6 months following 2<sup>nd</sup> vaccine dose.  
40  
41  
42

43  
44  
45 4) To determine safety and tolerability of COVID-19 vaccines in PLWH, based on local or  
46 systemic adverse events following first or second injections.  
47  
48

#### 49 50 Exploratory objectives:

51  
52 1) To determine if subpopulations of PLWH respond differently to COVID-19 vaccination.  
53  
54 Subpopulations of interest include, 1) PLWH >55 years of age; 2) immune non-responders (ART  
55  
56  
57  
58  
59  
60



1  
2  
3 treated, and fully suppressed HIV RNA (<40 copies/mL), but CD4 T cell counts below 350  
4 cells/mm<sup>3</sup> and CD4/CD8 T cell ratio <0.75); 3) PLWH with multimorbidity (2 or more chronic  
5 diseases) and 4) PLWH “reference” participants (with CD4 T cells >350 cells/mm<sup>3</sup>, suppressed  
6 viral load for at least 6 months, and have at most 1 comorbidity) (*Note: groups will not be mutually*  
7 *exclusive but will likely have overlapping characteristics*)  
8  
9

10  
11  
12 (2) To investigate if current COVID-19 vaccines elicit IgG that cross-recognize key COVID-19  
13 variants of concern (VoC), and if this differs in PLWH compared to individuals without HIV  
14

15  
16 (3) To compare virus-specific T cell responses generated by COVID-19 vaccines in PLWH and  
17 compare results with HIV-negative populations  
18  
19  
20  
21  
22  
23  
24  
25  
26  
27

## 28 **METHODS AND ANALYSIS**

### 29 **Study design**

30  
31 This study is a multi-centre prospective observational cohort study. Approximately four hundred  
32 (400) PLWH aged  $\geq 16$  years will be recruited from 4 sites in 3 Canadian provinces including 1)  
33 McGill University Health Centre/Jewish General Hospital (Montreal), 2) Ottawa Hospital  
34 Research Institute, 3) The University Health Network (Toronto), and 4) St. Paul’s Hospital  
35 (Vancouver). These sites were selected since they are 4 of the largest HIV clinics in Canada and  
36 have established research infrastructures to support the recruitment, enrolment and follow-up of a  
37 high volume of diverse study participants. These sites also have strong track records for rapid  
38 enrollment of participants in CTN studies. Many sites provide HIV care for many clients who are  
39 visible minorities and multiple morbidities. This will enable our sites to recruit a study population  
40 representative of PLWH most likely to be impacted by detrimental COVID-19-related outcomes.<sup>19</sup>  
41  
42  
43  
44  
45  
46  
47  
48  
49  
50  
51  
52  
53  
54  
55  
56  
57  
58  
59  
60

1  
2  
3 Data for HIV-negative individuals will be obtained from the Stop the Spread Ottawa (SSO) cohort.  
4  
5 Since we will not perform additional analyses on the samples of the SSO cohort then we can  
6  
7 include all the participants in the SSO study and matching of HIV-negative and positive  
8  
9 participants will not be required.  
10  
11  
12  
13  
14

15  
16 Determination of which vaccine is administered at any point in time and to which individuals is  
17  
18 dictated by Canada's provincial governments, with input from the National Advisory Committee  
19  
20 on Immunization (NACI), and is not influenced by study investigators or staff. We will include  
21  
22 participants irrespective of the specific type of COVID-19 vaccine. Furthermore, the duration of  
23  
24 the interval between 1<sup>st</sup> and 2<sup>nd</sup> doses time from when the vaccine was administered will not  
25  
26 influence eligibility, since Canada has decided to extend dose intervals for all 2 dose vaccines to  
27  
28 4 months. However, the duration of interval between vaccine doses will be included as an outcome  
29  
30 variable.  
31  
32  
33  
34  
35  
36  
37  
38

### 39 **Methods: Participants, intervention and comparator and outcomes**

40  
41 **Inclusion Criteria:** 1) Age  $\geq 16$  years; 2) HIV-positive for HIV group, immunocompetent and  
42  
43 generally in good health for the HIV-negative group; and 3) Receiving  $\geq 1$  dose of COVID-19  
44  
45 vaccine. Persons are still eligible to participate if they have already received one or two vaccine  
46  
47 doses.  
48  
49  
50

51 **Exclusion Criteria:** 1) Receipt of any blood product or immunoglobulin preparation within 1  
52  
53 month of vaccine administration and until study completion; 2) signs/symptoms of active COVID-  
54  
55 19 at the time of enrollment; 3) for the HIV-negative group: immunocompromised state or on  
56  
57  
58  
59

1  
2  
3 immunosuppressant medications. Prior receipt of other vaccines  $\leq 12$  months or past COVID-19  
4 infection are not exclusion criteria but will be recorded. Detectable HIV viral load on ART is not  
5 exclusionary.  
6  
7  
8  
9

10 The following groups of PLWH will be prioritized for study enrolment:

- 13 1. Older age (55 years and above). Older age is associated with immunosenescence and  
14 results in lower vaccine efficacy.<sup>35-37</sup> We have selected 55 as the specific age cut-off  
15 since PLWH tend to develop comorbidities at an earlier age.  
16  
17
- 18 2. Immune non-responders (CD4 T cell count  $< 350$  cells/mm<sup>3</sup>, CD4/CD8  $< 0.75$  with  
19 undetectable viral load for 1+ year). Immune non-responders may be at risk of more  
20 adverse COVID-19 related outcomes than HIV immune responders<sup>38,39,40,41</sup>.  
21  
22
- 23 3. Multi-morbidity (defined as having  $\geq 2$  comorbidities). Comorbidities may include  
24 cardiovascular disease (CVD), co-infection, hypertension, dyslipidemia, diabetes,  
25 chronic obstructive pulmonary disease and obesity among PLWH<sup>2,42-45</sup> and factors that  
26 contribute to worse outcomes with COVID-19.<sup>46</sup>  
27  
28
- 29 4. HIV-positive “stable” or “reference” group. These persons will have undetectable HIV  
30 viral load for  $> 6$  months, CD4 T cell counts  $> 350$  cells/mm<sup>3</sup>, and a maximum of 1  
31 comorbidity. To capture the full spectrum of individuals in the HIV-negative group, we  
32 will include this HIV-positive “stable” group so that we can determine whether there are  
33 particular characteristics within PLWH which impact on immune response. In comparing  
34 the stable and unstable groups, we will be able to determine whether participants with low  
35 CD4 counts ( $< 350$  cells/mm<sup>3</sup>) differ in their response to vaccine from those with normal  
36 CD4 T cell counts while controlling for other characteristics. We aim to enroll HIV-  
37  
38  
39  
40  
41  
42  
43  
44  
45  
46  
47  
48  
49  
50  
51  
52  
53  
54  
55  
56  
57  
58  
59  
60

1  
2  
3 negative and HIV-positive “stable” individuals with overlapping characteristics (i.e., some  
4  
5 should have multiple comorbidities) so that the groups are comparable.  
6  
7  
8

### 9 **General Methodology and participant timeline**

10  
11  
12 Participants will attend 5 visits over 12 months: pre-vaccination; 1 month following first vaccine  
13  
14 dose; and at 3, 6 and 12 months following the second vaccine dose (**Table 1**). Each visit will last  
15  
16 between 20-60 minutes.  
17  
18

19  
20 **Primary Endpoint:** Percentage of PLWH with COVID-19-specific antibodies at 6 months  
21  
22 following 2<sup>nd</sup> vaccine dose.  
23  
24

25 **Secondary Endpoints:** Percentage of individuals with 1) COVID-19 neutralization capacity at 6  
26  
27 months following 2<sup>nd</sup> vaccine dose and 2) COVID-19-specific antibodies at 12 months following  
28  
29 2<sup>nd</sup> vaccine dose. 3) Proportion and activation status of CD4 T cells, CD8 T cells, B cells, natural  
30  
31 killer cells and monocytes, pre-vaccination and 6 months post 2<sup>nd</sup> vaccine dose.  
32  
33

34 **Exploratory Endpoints:** 1) COVID-19-specific antibodies at 6 months following 2<sup>nd</sup> vaccine dose,  
35  
36 stratified by subpopulations. Critically, we will also assess the ability of vaccine-elicited antibodies  
37  
38 to cross-recognize SARS-CoV-2 S-protein variants, including N501Y and/or E484K, using in-  
39  
40 house assays.  
41  
42  
43  
44  
45  
46

### 47 **Sample size**

48  
49  
50 Our primary outcome is the proportion of individuals in each group who mount a satisfactory  
51  
52 immune response, although the best marker of what constitutes a satisfactory immune response is  
53  
54 unclear at the moment and the science is rapidly evolving. We initially defined a successful  
55  
56  
57  
58  
59  
60

1  
2  
3 immune response as a 4-fold relative rise in IgG production at 6 months.<sup>47</sup> We anticipated that  
4  
5 90% of HIV-negative individuals would mount an adequate IgG response at this timepoint<sup>27,34</sup>,  
6  
7 versus 70% of PLWH.<sup>12,48</sup> If 20% of the sample were to have the characteristic of interest or  
8  
9 predictor variable (e.g., 20% with multimorbidities), enrolling 200 PLWH and 50 HIV-negative  
10  
11 participants would provide sufficient statistical power (>80%) to detect a 20% difference in  
12  
13 outcomes between groups whatever the exact proportions. This sample size was determined using  
14  
15 the UCSF sample size calculator (<https://data.ucsf.edu/research/sample-size>) which uses the  
16  
17 typical normal distribution assumption with the continuity correction as an approximation to the  
18  
19 binomial distribution. In addition, we calculated that we would have >80% power to detect a 20%  
20  
21 difference in outcome between those with suppressed CD4 count or unsuppressed viral load and  
22  
23 the HIV- group. Previous studies of temporal differences in humoral and cellular responses to  
24  
25 COVID-19 have shown differences between individuals when sample sizes included 100  
26  
27 participants or fewer.<sup>49-53</sup> We would also have >80% power to detect a 20% difference in outcome  
28  
29 between the higher risk PLWH (ie, with CD4 counts <200 cells/mm<sup>3</sup> and/or unsuppressed HIV  
30  
31 viral load) and the HIV-negative group. Such recruitment targets would also also provide a  
32  
33 sufficient buffer to account for potential drop-outs of 5-10%. However, to increase our ability to  
34  
35 detect differences in our primary outcome between the four sub-populations of interest (individuals  
36  
37 of older age; immune non-responders; persons with multimorbidity; and an HIV-positive “stable”  
38  
39 or “reference” group), we plan to recruit 400 PLWH and use data from the *entire* cohort of HIV-  
40  
41 negative individuals in the SSO study (approximately 1000 individuals) to increase power.  
42  
43 Inevitably, the higher risk groups will be overlapping, so we will recruit a minimum of 20% of the  
44  
45 400 PLWH per category. By using the entire cohort of HIV-negative individuals in the SSO study,  
46  
47 we avoid the need to match PLWH and HIV-negative participants.  
48  
49  
50  
51  
52  
53  
54  
55  
56  
57  
58  
59  
60

## Recruitment

Participants will be informed about the study through a recruitment flyer during routine physician visits to their HIV clinic and via established recruitment strategies through our community partners and the CIHR Canadian HIV Trials Network (CTN) via webpages, email, and social media platforms. Individuals followed for routine HIV care at clinics other than the 4 enrolment sites are eligible to participate if they can come to the enrolment site for study visits. Participants will be compensated \$40 per study visit to help offset the time commitment and parking fees. We will make a concerted effort, through the use of recruitment quotas, to ensure the HIV-negative and HIV-positive “stable” groups have overlapping characteristics (eg, age >55 years, CD4 count <350 cells/mm<sup>3</sup>, comorbidities) so that the groups will be comparable.

## Data Collection

Medical history and HIV history will be gathered from both patient interviews and clinic chart reviews following written informed consent. Information extracted will include comorbidities, year of HIV diagnosis, CD4 T cell nadir (if known) in addition to tobacco smoking and cannabis use history. Medications will be recorded in addition to the ART regimen. History of COVID-19 infection and date of confirmatory test will be recorded.

**Sample Collection:** At each visit, blood will be collected to isolate serum, plasma and peripheral blood mononuclear cells (PBMCs).

**Humoral Immunity (SARS-CoV-2 Binding Antibodies):** We will evaluate levels of immunoglobulins M and A (IgM, IgA) and IgG targeting the SARS-CoV-2 Spike (S) protein

1  
2  
3 receptor-binding domain (RBD) and nucleocapsid protein using a high-throughput automated  
4  
5 ELISA co-developed and validated by Dr Marc-Andre Langlois,<sup>54</sup> thereby distinguishing vaccine-  
6  
7 induced (S only) from infection-induced (S and nucleocapsid (N)) responses. We will also evaluate  
8  
9 samples for IgM and IgG antibody cross-recognition of RBD derived from VoCs, including those  
10  
11 harbouring *N501Y* and/or *E484K* (e.g., Alpha and Beta strains, respectively) using a commercial  
12  
13 multiplex ELISA (V-Plex, Meso Scale Discovery). This assay is updated regularly by the  
14  
15 manufacturer to accommodate emerging spike variants. We will test plasma samples for their  
16  
17 capacity to block viral entry using a well-established neutralization assay based on retroviruses  
18  
19 pseudotyped with the SARS-CoV-2 S protein.<sup>49,51</sup>  
20  
21  
22

23  
24 **Cellular Immunity:** Flow cytometry will be performed to enumerate CD4 T cells (including helper  
25  
26 and regulatory subsets), CD8 T cells and other T cell subsets (including naïve, central memory,  
27  
28 transitional memory, effector memory and terminally differentiated cells), B cells (including naïve,  
29  
30 memory and antibody-secreting B cells), Natural Killer cells and monocytes (classical,  
31  
32 inflammatory and non-classical). We will also evaluate markers of cellular immune activation,  
33  
34 senescence and exhaustion. Following high-resolution Human Leukocyte Antigen class I/II typing,  
35  
36 we will examine COVID-19-specific T cell responses using an activation-induced marker (AIM)  
37  
38 assay. Briefly, PBMCs will be stimulated overnight with pools of SARS-CoV-2 S peptides.  
39  
40 Activated CD4 and CD8 T cells will be quantified by flow cytometry-based expression of CD137,  
41  
42 OX40 and/or CD69. Gene expression will be assessed by single-cell RNA sequencing of PBMC  
43  
44 as described previously.<sup>55</sup> T and B cell epitope specificity will be confirmed using virus-derived  
45  
46 antigens (peptide/HLA or RBD dextramers, respectively). Plasma levels of inflammatory markers  
47  
48 including interferon (IFN)- $\gamma$ , interleukin (IL)-1 $\beta$ , IL-2, IL-4, IL-6, IL-8, IL-10, IL-13, IL-17,  
49  
50 transforming growth factor (TGF)- $\beta$ , IFN- $\gamma$ -induced protein-10 (IP-10), IL-12p70 and tumour  
51  
52  
53  
54  
55  
56  
57  
58  
59  
60

1  
2  
3 necrosis factor (TNF)- $\alpha$  will be measured using multiplex Luminex assays, D-dimer, C-reactive  
4 protein, and markers of microbial translocation lipopolysaccharide (LPS), beta-d-glucan ( $\beta$ dG) and  
5 soluble CD14 will be evaluated by ELISA.<sup>56</sup>  
6  
7  
8  
9  
10

### 11 12 13 14 15 16 **Exploratory Safety and Tolerability of COVID-19 Vaccines in PLWH**

17  
18 In the prospective cohort, we will explore vaccine safety and efficacy to inform subsequent studies.  
19  
20 Reactogenicity: **Symptoms Diary:** Participants will be asked to document specific local and  
21 systemic reactions in a diary for 1 week and 1 month following each injection, as was done in  
22 Pfizer-BioNTech Phase 3 studies.<sup>47</sup> We will report the proportion of participants developing local  
23 (redness, pain or swelling at the injection site) or systemic effects (fatigue, headache, muscle pain,  
24 fever, joint pain, diarrhea) within 7-30 days following each vaccine dose with 95% confidence  
25 intervals (Supplementary information).  
26  
27  
28  
29  
30  
31  
32  
33

34  
35 **COVID-19 Questionnaires:** We will administer the COVID-19 System Questionnaire to  
36 participants who develop a flu-like illness to confirm the illness, along with PCR-based tests for  
37 COVID-19. Participants will complete the COVID-19 Immunity Task Force (CITF) Standardized  
38 Core Survey Data Elements questionnaire prior to vaccination and a modified CITF questionnaire  
39 (minus the demographic information) at follow-up visits (Supplementary information).  
40  
41  
42  
43  
44  
45

46  
47 If participants develop COVID-19 symptoms 14 days+ after vaccination, we will also collect CITF  
48 system questionnaire (length of illness and symptomatology, which vaccine was administered,  
49 number of vaccine doses received) and saliva specimens to enable study of COVID-19 variants of  
50 concern. ([https://www.covid19immunitytaskforce.ca/covid-19-immunity-task-force-releases-  
51 standardized-core-survey-data-elements/](https://www.covid19immunitytaskforce.ca/covid-19-immunity-task-force-releases-standardized-core-survey-data-elements/))  
52  
53  
54  
55  
56  
57  
58  
59  
60



## Data management

The study sponsor, the CTN, will be responsible for national project management, database development, data management and data analysis. To facilitate data sharing, we will: 1) use standard encodings for CITF-defined Core Data Elements; 1) request immunogenicity study participants consent to data sharing as guided by the CITF, including collecting survey elements and saliva 14+ days after vaccination on symptomatic participants to determine whether the infecting strain is a COVID-19 VoC and 3) rapidly share interim data and all requested study metadata for cataloguing.

## Confidentiality

All participant-related information, including Case Report Forms, laboratory specimens, evaluation forms and reports, will be kept strictly confidential. All records will be held in a secure, locked location and only accessible to research staff. Participants will be identified using a coded number specific to each participant. All computerized databases will identify participants by numeric codes only and will be password protected. Upon request, and in the presence of the investigator or his/her representative, participant data will be made available to the study sponsor, monitoring groups representative of the study sponsor, representatives of funding groups, and applicable regulatory agencies to verify clinical study procedures and/or data, as permissible by local regulations.

## Statistical Analyses

1  
2  
3 We will use regression techniques to compare COVID-19-specific immune responses applying  
4 data transformation where necessary to conform with distributional assumptions in order to  
5 determine whether there are differences between the “unstable” (CD4<350) PLWH group, the  
6 stable PLWH cohort and the HIV- controls, taking into account factors that are believed to be  
7 associated with immune response. We will also perform unadjusted analyses to determine  
8 whether there are differences which may or not be driven by factors associated with group  
9 membership. We will report data from exploratory analyses with descriptive statistics and data  
10 for vaccines from different manufacturers separately and combined. We will stratify results by  
11 the number of doses received and the time interval between the two doses in case these factors  
12 drive response and differ between groups. We will stratify immunogenicity data by sex as  
13 females and males have differences in both vaccine-elicited immune responses<sup>57</sup> and adverse  
14 effects from vaccines.<sup>58</sup> Furthermore, we will stratify analyses by individuals who are naive  
15 to COVID-19 versus those with pre-existing antibodies as a result of prior COVID-19  
16 infection. This will be important since antibody responses (particularly after the 1st dose) will  
17 be much higher in convalescent individuals,<sup>59,60</sup> so it is not appropriate to include them with  
18 individuals who do not have pre-existing antibodies to COVID-19.  
19  
20  
21  
22  
23  
24  
25  
26  
27  
28  
29  
30  
31  
32  
33  
34  
35  
36  
37  
38  
39  
40  
41  
42  
43  
44  
45

## 46 **ETHICS AND DISSEMINATION**

### 47 **Ethics approval and consent to participate**

48  
49  
50  
51 Written informed consent will be obtained from all study participants. The study will be conducted  
52 in accordance with the Declaration of Helsinki. At the time of initial manuscript submission (June  
53 2021), a very closely related protocol had been approved by the University of British  
54  
55  
56  
57  
58  
59  
60

1  
2  
3 Columbia/Providence Health Care Research Institute and Simon Fraser University Research  
4  
5 Ethics Boards. The present protocol was later approved by the Research Institute of the McGill  
6  
7 University Health Centre (2<sup>nd</sup> review), the Ottawa Hospital Research Ethics Board, the University  
8  
9 of Toronto Research Ethics Board. Patient enrollment for this trial began June 2021. Both the  
10  
11 protocol and informed forms were reviewed and approved by the CTN Community Advisory  
12  
13 Committee.  
14  
15

### 20 **Availability of data and materials**

21  
22  
23 De-identified participant data will be stored on a secure password-protected RedCap database.  
24  
25 Access to the database will be controlled by the CTN. Access to the final study database will be  
26  
27 provided upon written reasonable request to the corresponding author/principal investigator  
28  
29 following publication and CTN and CITF approval.  
30  
31

32  
33  
34 We will standardize reagents and analysis strategies, where possible, working with the Immune  
35  
36 Sciences Network and Testing Working Party recommendations to enable data sharing and avoid  
37  
38 duplication in consultation with other CIHR and CITF-funded vaccine surveillance projects. We  
39  
40 will also contribute results to SeroTracker, a knowledge hub that tracks and synthesizes findings  
41  
42 from SARS- CoV-2 serosurveillance efforts worldwide  
43  
44 (<https://www.covid19immunitytaskforce.ca/serotracker/>). To inform COVID-19 immunization  
45  
46  
47  
48  
49 guidelines and future interventions for PLWH in Canada and internationally, we are committed to  
50  
51  
52  
53 sharing results with all stakeholders and will adhere to Wellcome's *Sharing research data and*  
54  
55  
56  
57  
58  
59

1  
2  
3  
4 *findings relevant to the novel coronavirus (COVID-19) outbreak* statement.<sup>61</sup> Data sharing  
5  
6 agreements will be obtained between CTN sites to use data not sent to the CITF.  
7  
8  
9  
10  
11  
12  
13  
14

### 15 **Knowledge Translation (KT) & Dissemination Plan**

16  
17  
18 Serology results will be provided to individual study participants at the end of the study, along  
19  
20  
21 with a summary of study results and their implication in lay language. We prioritize meaningful  
22  
23  
24 community engagement and our Community Advisory Committee includes PLWH and  
25  
26  
27 representation from the Canadian Aboriginal AIDS Network. The Community Advisory  
28  
29  
30  
31  
32  
33  
34  
35  
36  
37  
38  
39  
40  
41  
42  
43  
44  
45  
46  
47  
48  
49  
50  
51  
52  
53  
54  
55  
56  
57  
58  
59  
60  
61  
62  
63  
64  
65  
66  
67  
68  
69  
70  
71  
72  
73  
74  
75  
76  
77  
78  
79  
80  
81  
82  
83  
84  
85  
86  
87  
88  
89  
90  
91  
92  
93  
94  
95  
96  
97  
98  
99  
100  
101  
102  
103  
104  
105  
106  
107  
108  
109  
110  
111  
112  
113  
114  
115  
116  
117  
118  
119  
120  
121  
122  
123  
124  
125  
126  
127  
128  
129  
130  
131  
132  
133  
134  
135  
136  
137  
138  
139  
140  
141  
142  
143  
144  
145  
146  
147  
148  
149  
150  
151  
152  
153  
154  
155  
156  
157  
158  
159  
160  
161  
162  
163  
164  
165  
166  
167  
168  
169  
170  
171  
172  
173  
174  
175  
176  
177  
178  
179  
180  
181  
182  
183  
184  
185  
186  
187  
188  
189  
190  
191  
192  
193  
194  
195  
196  
197  
198  
199  
200  
201  
202  
203  
204  
205  
206  
207  
208  
209  
210  
211  
212  
213  
214  
215  
216  
217  
218  
219  
220  
221  
222  
223  
224  
225  
226  
227  
228  
229  
230  
231  
232  
233  
234  
235  
236  
237  
238  
239  
240  
241  
242  
243  
244  
245  
246  
247  
248  
249  
250  
251  
252  
253  
254  
255  
256  
257  
258  
259  
260  
261  
262  
263  
264  
265  
266  
267  
268  
269  
270  
271  
272  
273  
274  
275  
276  
277  
278  
279  
280  
281  
282  
283  
284  
285  
286  
287  
288  
289  
290  
291  
292  
293  
294  
295  
296  
297  
298  
299  
300  
301  
302  
303  
304  
305  
306  
307  
308  
309  
310  
311  
312  
313  
314  
315  
316  
317  
318  
319  
320  
321  
322  
323  
324  
325  
326  
327  
328  
329  
330  
331  
332  
333  
334  
335  
336  
337  
338  
339  
340  
341  
342  
343  
344  
345  
346  
347  
348  
349  
350  
351  
352  
353  
354  
355  
356  
357  
358  
359  
360  
361  
362  
363  
364  
365  
366  
367  
368  
369  
370  
371  
372  
373  
374  
375  
376  
377  
378  
379  
380  
381  
382  
383  
384  
385  
386  
387  
388  
389  
390  
391  
392  
393  
394  
395  
396  
397  
398  
399  
400  
401  
402  
403  
404  
405  
406  
407  
408  
409  
410  
411  
412  
413  
414  
415  
416  
417  
418  
419  
420  
421  
422  
423  
424  
425  
426  
427  
428  
429  
430  
431  
432  
433  
434  
435  
436  
437  
438  
439  
440  
441  
442  
443  
444  
445  
446  
447  
448  
449  
450  
451  
452  
453  
454  
455  
456  
457  
458  
459  
460  
461  
462  
463  
464  
465  
466  
467  
468  
469  
470  
471  
472  
473  
474  
475  
476  
477  
478  
479  
480  
481  
482  
483  
484  
485  
486  
487  
488  
489  
490  
491  
492  
493  
494  
495  
496  
497  
498  
499  
500  
501  
502  
503  
504  
505  
506  
507  
508  
509  
510  
511  
512  
513  
514  
515  
516  
517  
518  
519  
520  
521  
522  
523  
524  
525  
526  
527  
528  
529  
530  
531  
532  
533  
534  
535  
536  
537  
538  
539  
540  
541  
542  
543  
544  
545  
546  
547  
548  
549  
550  
551  
552  
553  
554  
555  
556  
557  
558  
559  
560  
561  
562  
563  
564  
565  
566  
567  
568  
569  
570  
571  
572  
573  
574  
575  
576  
577  
578  
579  
580  
581  
582  
583  
584  
585  
586  
587  
588  
589  
590  
591  
592  
593  
594  
595  
596  
597  
598  
599  
600  
601  
602  
603  
604  
605  
606  
607  
608  
609  
610  
611  
612  
613  
614  
615  
616  
617  
618  
619  
620  
621  
622  
623  
624  
625  
626  
627  
628  
629  
630  
631  
632  
633  
634  
635  
636  
637  
638  
639  
640  
641  
642  
643  
644  
645  
646  
647  
648  
649  
650  
651  
652  
653  
654  
655  
656  
657  
658  
659  
660  
661  
662  
663  
664  
665  
666  
667  
668  
669  
670  
671  
672  
673  
674  
675  
676  
677  
678  
679  
680  
681  
682  
683  
684  
685  
686  
687  
688  
689  
690  
691  
692  
693  
694  
695  
696  
697  
698  
699  
700  
701  
702  
703  
704  
705  
706  
707  
708  
709  
710  
711  
712  
713  
714  
715  
716  
717  
718  
719  
720  
721  
722  
723  
724  
725  
726  
727  
728  
729  
730  
731  
732  
733  
734  
735  
736  
737  
738  
739  
740  
741  
742  
743  
744  
745  
746  
747  
748  
749  
750  
751  
752  
753  
754  
755  
756  
757  
758  
759  
760  
761  
762  
763  
764  
765  
766  
767  
768  
769  
770  
771  
772  
773  
774  
775  
776  
777  
778  
779  
780  
781  
782  
783  
784  
785  
786  
787  
788  
789  
790  
791  
792  
793  
794  
795  
796  
797  
798  
799  
800  
801  
802  
803  
804  
805  
806  
807  
808  
809  
810  
811  
812  
813  
814  
815  
816  
817  
818  
819  
820  
821  
822  
823  
824  
825  
826  
827  
828  
829  
830  
831  
832  
833  
834  
835  
836  
837  
838  
839  
840  
841  
842  
843  
844  
845  
846  
847  
848  
849  
850  
851  
852  
853  
854  
855  
856  
857  
858  
859  
860  
861  
862  
863  
864  
865  
866  
867  
868  
869  
870  
871  
872  
873  
874  
875  
876  
877  
878  
879  
880  
881  
882  
883  
884  
885  
886  
887  
888  
889  
890  
891  
892  
893  
894  
895  
896  
897  
898  
899  
900  
901  
902  
903  
904  
905  
906  
907  
908  
909  
910  
911  
912  
913  
914  
915  
916  
917  
918  
919  
920  
921  
922  
923  
924  
925  
926  
927  
928  
929  
930  
931  
932  
933  
934  
935  
936  
937  
938  
939  
940  
941  
942  
943  
944  
945  
946  
947  
948  
949  
950  
951  
952  
953  
954  
955  
956  
957  
958  
959  
960  
961  
962  
963  
964  
965  
966  
967  
968  
969  
970  
971  
972  
973  
974  
975  
976  
977  
978  
979  
980  
981  
982  
983  
984  
985  
986  
987  
988  
989  
990  
991  
992  
993  
994  
995  
996  
997  
998  
999  
1000

1  
2  
3  
4 completing the 6-month post 2<sup>nd</sup> vaccine dose study visit. A second manuscript outlining the  
5  
6  
7 durability results will be submitted for publication within 6 months of participants completing the  
8  
9  
10 12-month post 2<sup>nd</sup> dose study visit. Data will also be shared with CTN members at the semiannual  
11  
12  
13 meetings and through conference abstracts.  
14  
15  
16  
17  
18  
19  
20  
21  
22

### 23 **Patient and Public Involvement**

24  
25  
26 The CTN Community Advisory Committee (CAC) was involved in the peer review process of this  
27  
28 study proposal and deemed that the research questions addressed were of very high priority to  
29  
30 PLWH. The CAC's critiques of the initial proposal were taken into account in the revised  
31  
32 proposal. Two members of the CAC (SM and EM) were involved in finalizing the study design,  
33  
34 inclusion/exclusion criteria, outcome measures and monitoring plans and are formal study  
35  
36 investigators and co-authors. Community consultants will receive financial compensation to  
37  
38 recognize their time commitment and expertise.  
39  
40  
41  
42  
43  
44

### 45 **DISCUSSION**

46  
47  
48 Herein, we present the protocol for an observational cohort study to evaluate COVID-19 vaccine-  
49  
50 elicited immunogenicity in PLWH, with a priority of determining immunogenicity in PLWH who  
51  
52 are of older age, immune non-responders and those with multimorbidity. These 3 groups were  
53  
54  
55  
56  
57  
58  
59  
60

1  
2  
3 selected since they represent subpopulations most likely to experience poor outcomes following  
4  
5 COVID-19 infection and have a weaker immune response to vaccination.  
6  
7  
8  
9

10  
11 PLWH immune non-responders are at risk of more adverse COVID-19 related outcomes than HIV  
12  
13 immune responders. In the study performed by Braunstein *et al.* (2021), PLWH with COVID-19  
14  
15 had a higher proportion of hospital admissions, intensive care unit (ICU) admission and death.  
16  
17 Those who experienced these COVID-19-related outcomes had CD4 T cell counts below 500  
18  
19 cells/mm<sup>3</sup>.<sup>3,38</sup> Similarly, the study by Dandachi *et al.* (2021) found that having CD4 T cell counts  
20  
21 below 200 cells/mm<sup>3</sup> was associated with severe outcomes such as ICU admission, intubation and  
22  
23 death.<sup>39</sup> Furthermore, a multicentre cohort study by Hoffman *et al.* showed that CD4 T cell counts  
24  
25 <350 cells/mm<sup>3</sup> were associated with severe COVID-19 (adjusted OR 2.85, 95% CI 1.26-6.44 ).<sup>40</sup>  
26  
27  
28 However, in a group of patients with inborn errors of immunity, Kinoshita *et al.*(2021) they  
29  
30 demonstrated robust T cell activity and humoral immunity against COVID-19 structural proteins  
31  
32 in some patients with antibody deficiency,<sup>62</sup> underscoring the heterogeneity and complexity of  
33  
34 immune response.  
35  
36  
37  
38  
39  
40  
41

42 A major challenge with planning this study is the unprecedented, rapidly-changing nature of the  
43  
44 COVID-19 pandemic and evolving scientific information. As a result, data on the optimal time  
45  
46 points to assess immune responses post COVID-19 vaccination administration are rapidly  
47  
48 changing, resulting in multiple adjustments in our protocol plans. Within Canada, the vaccination  
49  
50 schedule is determined by provincial vaccination programs based on review of evidence,  
51  
52 population risk factors and local infection rates, along with input from NACI. However,  
53  
54 differences exist between provinces regarding to vaccine supply, eligibility criteria, type of vaccine  
55  
56  
57  
58  
59

1  
2  
3 administered and time period between vaccine doses. We are mitigating these challenges by  
4 holding monthly meetings with teams to discuss these issues over the previous month, troubleshoot  
5 and adjust recruitment priorities accordingly for the upcoming months. Ideally, and under non-  
6 pandemic circumstances, we would establish, a priori, methods for analyzing data from single vs.  
7 two-dose vaccines. However, in the current context with uncertainty of vaccine supply and  
8 distribution, such detailed plans are impractical and will depend on the methods of vaccination  
9 used in the participants enrolling in this study. This statement holds true for other variables we  
10 will likely encounter, such as different dosing intervals amongst persons receiving two-dose  
11 vaccines.  
12  
13  
14  
15  
16  
17  
18  
19  
20  
21  
22  
23  
24  
25  
26  
27  
28

29 The importance of advanced age in impaired vaccine-induced immunogenicity is well-  
30 documented. Due to a combination of disrupted posttranscriptional regulation, T cell receptor  
31 signalling, and metabolic function, older individuals demonstrate reduced quantity and  
32 functionality of T-cells<sup>63,64</sup>. When this balance is disrupted, T-cells exhibit shorter-lived effector  
33 phenotypes rather than memory or follicular helper T cells and vaccine-induced antibodies are less  
34 protective than in younger persons<sup>63,64</sup>. As the elderly are considered a priority vaccination group,  
35 many of them were eligible for vaccination in early 2021 in Canada, before this current study  
36 began, meaning that baseline plasma, serum and PBMCs will not be available for participants in  
37 this subpopulation of interest. Another drawback with starting this study in May 2021 is that we  
38 may miss other important groups of PLWH, including Indigenous persons, who were prioritized  
39  
40  
41  
42  
43  
44  
45  
46  
47  
48  
49  
50  
51  
52  
53  
54  
55  
56  
57  
58  
59  
60

1  
2  
3 as high-risk populations for immunization and were eligible to receive COVID-19 vaccines at a  
4  
5 younger age than the general population.  
6  
7  
8  
9  
10

11  
12 Another major challenge with the planning of this study was the need to ensure an adequate sample  
13  
14 size to meet the primary objective in the group as a whole, but also in important subpopulations of  
15  
16 PLWH. Enrollment of such a large number of individuals, with follow-up until 12 months  
17  
18 following the second vaccine dose, is very resource-intensive and requires dedicated study  
19  
20 participants. We will provide individualized antibody results to participants at study completion to  
21  
22 increase study engagement and prevent drop-outs. Furthermore, due to the need to rapidly enroll  
23  
24 participants to match the pace of the COVID-19 vaccine rollout, we decided to use CTN study  
25  
26 sites with large clinic volumes and proven capacity to recruit. However, these clinics are based in  
27  
28 urban centres and, therefore, may follow individuals who differ systematically from PLWH who  
29  
30 live in rural areas. PLWH who live in cities may be of higher socioeconomic status and consist of  
31  
32 more men who have sex with men (MSM). Therefore, each site will need to make a concerted  
33  
34 effort to recruit sufficient participants with other profiles. For this reason, we will employ a flexible  
35  
36 recruitment strategy, whereby sites that can recruit the required participants with characteristics of  
37  
38 interest more easily than other sites can help to make up for lower recruitment flexibility at other  
39  
40 sites. As with many studies, recruitment of women living with HIV may be challenging. Due to  
41  
42 our connection with other studies within the CTN and the help of our community advisory board,  
43  
44 we are encouraging clinics with predominantly female clients to ensure they inform their female  
45  
46 patients living with HIV about this study.  
47  
48  
49  
50  
51  
52  
53  
54  
55  
56  
57  
58  
59  
60



1  
2  
3 Currently, the immune correlate of protection against COVID-19 is undefined. T cell and B cell  
4 responses are usually used as surrogates of protection.<sup>65</sup> We decided to use a 4-fold rise from  
5 baseline in IgG production following second vaccine dose as the criteria for a successful vaccine  
6 response, as was indicated in the Pfizer study<sup>47</sup>. Data from the Pfizer study submitted to the Food  
7 and Drug Administration and published by Walsh *et al.*, report geometric mean titers that were  
8 compared to those from a human SARS-CoV-2 convalescent serum panel as a benchmark.  
9 Increased titers were expressed in logarithmic fold increases.<sup>66</sup> There are currently no national  
10 standards for presenting the serology data. Some groups prefer to report the raw signal values,  
11 whereas others normalize data as fold increases. Since individual baseline values will not be  
12 available for participants who have already received their first vaccine dose, one option is to use  
13 the cohort baseline data derived from non-vaccinated participants. Alternatively, we may opt to  
14 examine relative titers, or fold-changes, and therefore baseline data will not actually be required.  
15 Since science is continuously evolving, we will use the definition of a successful vaccine response  
16 which is most widely accepted at the time of publication.  
17  
18  
19  
20  
21  
22  
23  
24  
25  
26  
27  
28  
29  
30  
31  
32  
33  
34  
35  
36  
37  
38

39 The best methodology to match PLWH with the HIV-negative group remains unclear, and there is  
40 no optimal approach to match participants to controls. As discussed by Wong *et al.* (2014), the  
41 ideal comparison group would be individuals who are identical to HIV-negative adults in all  
42 aspects except HIV status<sup>67</sup>. As PLWH have distinct characteristics, traditional risk factors,  
43 lifestyle factors and socioeconomic factors compared to the general population, the general  
44 population may not be the ideal comparison group<sup>67</sup>. Differences include increased tobacco  
45 smoking<sup>68</sup>, substance use<sup>69</sup> and comorbidities<sup>70</sup> amongst PLWH compared to the general  
46 population. However, PLWH also undergo more screening for age-related comorbidities due to  
47  
48  
49  
50  
51  
52  
53  
54  
55  
56  
57  
58  
59  
60

1  
2  
3 frequent contact with health care providers<sup>67</sup>. Since matching is challenging, we will avoid the  
4 need to match individuals entirely, by using a large existing dataset of over 1000 individuals  
5 without HIV infection. As previously mentioned, as long as we ensure there are 20% of individuals  
6 with the characteristics of interest in the HIV-negative and HIV-positive “stable” cohorts, we can  
7 compare groups while adjusting for these characteristics via regression.  
8  
9  
10  
11  
12  
13

14  
15 The findings from this study will provide valuable insight into COVID-19-vaccine-induced  
16 immunogenicity in important sub-populations of PLWH. HIV-positive persons of older age, with  
17 CD4 counts <350 cells/mm<sup>3</sup> and multimorbidity were not included in the early clinical trials, yet  
18 are most likely to suffer from poor outcomes if infected with COVID-19. These findings will  
19 inform clinical guidelines and recommendations for PLWH and, in turn, reduce COVID-19-  
20 induced morbidity and mortality.  
21  
22  
23  
24  
25  
26  
27  
28  
29  
30  
31

## 32 REFERENCES

- 33  
34  
35 1. Gazzola L, Tincati C, Bellistri GM, Monforte A, Marchetti G. The absence of CD4+ T  
36 cell count recovery despite receipt of virologically suppressive highly active antiretroviral  
37 therapy: clinical risk, immunological gaps, and therapeutic options. *Clin Infect Dis*.  
38 2009;48(3):328-337.
- 39  
40 2. Lerner AM, Eisinger RW, Fauci AS. Comorbidities in Persons With HIV: The Lingering  
41 Challenge. *JAMA*. 2019.
- 42  
43 3. Hsue PY, Deeks SG, Hunt PW. Immunologic basis of cardiovascular disease in HIV-  
44 infected adults. *J Infect Dis*. 2012;205 Suppl 3:S375-382.
- 45  
46 4. Serrano-Villar S, Sainz T, Lee SA, et al. HIV-infected individuals with low CD4/CD8  
47 ratio despite effective antiretroviral therapy exhibit altered T cell subsets, heightened  
48 CD8+ T cell activation, and increased risk of non-AIDS morbidity and mortality. *PLoS*  
49 *Pathog*. 2014;10(5):e1004078.
- 50  
51 5. Klein M, Lu Y, DelBalso L, Cote S, Boivin G. Influenza infection is a primary cause of  
52 febrile respiratory illness in HIV-infection adults despite vaccination. *Clin Infect Dis*.  
53 2007; 45(2):234-40.
- 54  
55 6. French N, Gordon SB, Mwalukomo T, et al. A trial of a 7-valent pneumococcal conjugate  
56 vaccine in HIV-infected adults. *N Engl J Med*. 2010;362(9):812-822.  
57  
58  
59  
60

7. Glaser JB, Volpe S, Aguirre A, Simpkins H, Schiffman G. Zidovudine improves response to pneumococcal vaccine among persons with AIDS and AIDS-related complex. *J Infect Dis.* 1991;164(4):761-764.
8. Wallace MR, Brandt CJ, Earhart KC, et al. Safety and immunogenicity of an inactivated hepatitis A vaccine among HIV-infected subjects. *Clin Infect Dis.* 2004;39(8):1207-1213.
9. Crum-Cianflone NF, Wilkins K, Lee AW, et al. Long-term durability of immune responses after hepatitis A vaccination among HIV-infected adults. *J Infect Dis.* 2011;203(12):1815-1823.
10. Kemper CA, Haubrich R, Frank I, et al. Safety and immunogenicity of hepatitis A vaccine in human immunodeficiency virus-infected patients: a double-blind, randomized, placebo-controlled trial. *J Infect Dis.* 2003;187(8):1327-1331.
11. Overton ET, Sungkanuparph S, Powderly WG, Seyfried W, Groger RK, Aberg JA. Undetectable plasma HIV RNA load predicts success after hepatitis B vaccination in HIV-infected persons. *Clin Infect Dis.* 2005;41(7):1045-1048.
12. El Chaer F, El Sahly HM. Vaccination in the Adult Patient Infected with HIV: A Review of Vaccine Efficacy and Immunogenicity. *Am J Med.* 2019;132(4):437-446.
13. Tedaldi EM, Baker RK, Moorman AC, et al. Hepatitis A and B vaccination practices for ambulatory patients infected with HIV. *Clin Infect Dis.* 2004;38(10):1478-1484.
14. Staprans SI, Hamilton BL, Follansbee SE, et al. Activation of virus replication after vaccination of HIV-1-infected individuals. *J Exp Med.* 1995;182(6):1727-1737.
15. Amoah S, Mishina M, Praphasiri P, et al. Standard-Dose Intradermal Influenza Vaccine Elicits Cellular Immune Responses Similar to Those of Intramuscular Vaccine in Men With and Those Without HIV Infection. *J Infect Dis.* 2019;220(5):743-751.
16. Kroon FP, van Dissel JT, de Jong JC, Zwinderman K, van Furth R. Antibody response after influenza vaccination in HIV-infected individuals: a consecutive 3-year study. *Vaccine.* 2000;18(26):3040-3049.
17. d'Arminio Monforte A, Bonnet F, Bucher HC, et al. What do the changing patterns of comorbidity burden in people living with HIV mean for long-term management? Perspectives from European HIV cohorts. *HIV Med.* 2020;21 Suppl 2:3-16.
18. Millett GA. New pathogen, same disparities: why COVID-19 and HIV remain prevalent in U.S. communities of colour and implications for ending the HIV epidemic. *J Int AIDS Soc.* 2020;23(11):e25639.
19. Weiser JK, Tie Y, Beer L, Neblett Fanfair R, Shouse RL. Racial/Ethnic and Income Disparities in the Prevalence of Comorbidities that Are Associated With Risk for Severe COVID-19 Among Adults Receiving HIV Care, United States, 2014-2019. *J Acquir Immune Defic Syndr.* 2021;86(3):297-304.
20. R. P. Have COVID-19 vaccines been tested in people with HIV? *NAM AIDSMAP* Accessed online 15 January 2021 from <https://www.aidsmap.com/about-hiv/have-covid-19-vaccines-been-tested-people-hiv>. 2021.
21. Ramasamy MN, Minassian AM, Ewer KJ, et al. Safety and immunogenicity of ChAdOx1 nCoV-19 vaccine administered in a prime-boost regimen in young and old adults (COV002): a single-blind, randomised, controlled, phase 2/3 trial. *Lancet.* 2020.
22. COVID-19 Vaccine (ChAdOx1 nCoV-19) Trial in South African Adults With and Without HIV-infection. NIH US National Library of Medicine. ClinicalTrials.gov. <https://clinicaltrials.gov/ct2/show/NCT04444674?cond=HIV+and+COVID&draw=4> Date accessed: 6 May 2021.

- 1  
2  
3  
4  
5  
6  
7  
8  
9  
10  
11  
12  
13  
14  
15  
16  
17  
18  
19  
20  
21  
22  
23  
24  
25  
26  
27  
28  
29  
30  
31  
32  
33  
34  
35  
36  
37  
38  
39  
40  
41  
42  
43  
44  
45  
46  
47  
48  
49  
50  
51  
52  
53  
54  
55  
56  
57  
58  
59  
60
23. Clinical Study Protocol: A Phase 3, Randomized, Stratified, Observer-Blind, Placebo-Controlled Study to Evaluate the Efficacy, Safety, and Immunogenicity of mRNA-1273 SARS-CoV-2 Vaccine in Adults Aged 18 Years and Older. ModernaTX, Inc. <https://www.modernatx.com/sites/default/files/mRNA-1273-P301-Protocol.pdf> Date accessed: 5 November 2020.
  24. Clinical Study Protocol: A Randomized, Double-blind, Placebo-controlled Phase 3 Study to Assess the Efficacy and Safety of Ad26.COV2.S for the Prevention of SARS-CoV-2-mediated COVID-19 in Adults Aged 18 Years and Older. Janssen Vaccines & Prevention B.V <https://www.jnj.com/coronavirus/ensemble-1-study-protocol> Date accessed: 5 November 2020.
  25. Shinde V, Bhikha S, Hoosain Z, et al. Efficacy of NVX-CoV2373 Covid-19 Vaccine against the B.1.351 Variant. *N Engl J Med.* 2021;384(20):1899-1909.
  26. Ruddy JA, Boyarsky BJ, Werbel WA, et al. Safety and antibody response to the first dose of SARS-CoV-2 messenger RNA vaccine in persons with HIV. *AIDS.* 2021.
  27. Polack FP, Thomas SJ, Kitchin N, et al. Safety and Efficacy of the BNT162b2 mRNA Covid-19 Vaccine. *N Engl J Med.* 2020.
  28. Weiskopf D, Schmitz KS, Raadsen MP, et al. Phenotype and kinetics of SARS-CoV-2-specific T cells in COVID-19 patients with acute respiratory distress syndrome. *Sci Immunol.* 2020;5(48).
  29. Zuo J DA, Pearce H et al. Robust SARS-CoV-2-specific T-cell immunity is maintained at 6 months following primary infection. *BioRxiv 2020:20201101362319v1 [Preprint]* [www.biorxiv.org/content/101101/20201101362319v1](http://www.biorxiv.org/content/101101/20201101362319v1). 2020.
  30. Sewell HF, Agius RM, Kendrick D, Stewart M. Covid-19 vaccines: delivering protective immunity. *BMJ.* 2020;371:m4838.
  31. Deeks SG, Martin JN, Sinclair E, et al. Strong cell-mediated immune responses are associated with the maintenance of low-level viremia in antiretroviral-treated individuals with drug-resistant human immunodeficiency virus type 1. *J Infect Dis.* 2004;189(2):312-321.
  32. Deeks SG, Phillips AN. HIV infection, antiretroviral treatment, ageing, and non-AIDS related morbidity. *BMJ.* 2009;338:a3172.
  33. Peng X, Ouyang J, Isnard S, et al. Sharing CD4+ T Cell Loss: When COVID-19 and HIV Collide on Immune System. *Front Immunol.* 2020;11:596631.
  34. Jackson LA, Anderson EJ, Rouphael NG, et al. An mRNA Vaccine against SARS-CoV-2 - Preliminary Report. *N Engl J Med.* 2020;383(20):1920-1931.
  35. Pereira B, Xu XN, Akbar AN. Targeting Inflammation and Immunosenescence to Improve Vaccine Responses in the Elderly. *Front Immunol.* 2020;11:583019.
  36. Wagner A, Garner-Spitzer E, Jasinska J, et al. Age-related differences in humoral and cellular immune responses after primary immunisation: indications for stratified vaccination schedules. *Sci Rep.* 2018;8(1):9825.
  37. Wagner A, Weinberger B. Vaccines to Prevent Infectious Diseases in the Older Population: Immunological Challenges and Future Perspectives. *Front Immunol.* 2020;11:717.
  38. Braunstein SL, Lazar R, Wahnich A, Daskalakis DC, Blackstock OJ. COVID-19 infection among people with HIV in New York City: A population-level analysis of linked surveillance data. *Clin Infect Dis.* 2020.

- 1
  - 2
  - 3
  - 4
  - 5
  - 6
  - 7
  - 8
  - 9
  - 10
  - 11
  - 12
  - 13
  - 14
  - 15
  - 16
  - 17
  - 18
  - 19
  - 20
  - 21
  - 22
  - 23
  - 24
  - 25
  - 26
  - 27
  - 28
  - 29
  - 30
  - 31
  - 32
  - 33
  - 34
  - 35
  - 36
  - 37
  - 38
  - 39
  - 40
  - 41
  - 42
  - 43
  - 44
  - 45
  - 46
  - 47
  - 48
  - 49
  - 50
  - 51
  - 52
  - 53
  - 54
  - 55
  - 56
  - 57
  - 58
  - 59
  - 60
39. Dandachi D, Geiger G, Montgomery MW, et al. Characteristics, Comorbidities, and Outcomes in a Multicenter Registry of Patients with HIV and Coronavirus Disease-19. *Clin Infect Dis*. 2020.
40. Hoffmann C, Casado JL, Harter G, et al. Immune deficiency is a risk factor for severe COVID-19 in people living with HIV. *HIV Med*. 2021;22(5):372-378.
41. Lu W, Mehraj V, Vyboh K, Cao W, Li T, Routy JP. CD4:CD8 ratio as a frontier marker for clinical outcome, immune dysfunction and viral reservoir size in virologically suppressed HIV-positive patients. *J Int AIDS Soc*. 2015;18:20052.
42. Nanditha NGA, Paiero A, Tafessu HM, et al. Excess burden of age-associated comorbidities among people living with HIV in British Columbia, Canada: a population-based cohort study. *BMJ Open*. 2021;11(1):e041734.
43. Roy Cardinal MH, Durand M, Chartrand-Lefebvre C, et al. Increased carotid artery wall stiffness and plaque prevalence in HIV infected patients measured with ultrasound elastography. *Eur Radiol*. 2020;30(6):3178-3187.
44. Triplette M, Justice A, Attia EF, et al. Markers of chronic obstructive pulmonary disease are associated with mortality in people living with HIV. *AIDS*. 2018;32(4):487-493.
45. Gallant J, Hsue PY, Shreay S, Meyer N. Comorbidities Among US Patients With Prevalent HIV Infection-A Trend Analysis. *J Infect Dis*. 2017;216(12):1525-1533.
46. Richardson S, Hirsch JS, Narasimhan M, et al. Presenting Characteristics, Comorbidities, and Outcomes Among 5700 Patients Hospitalized With COVID-19 in the New York City Area. *JAMA*. 2020;323(20):2052-2059.
47. Pfizer BioNTech A Phase 1/2/3 placebo-controlled, randomized, observer-blind, dose-finding study to evaluate the safety, tolerability, immunogenicity, and efficacy of SARS-CoV-2 RNA vaccine candidates against COVID-10 in healthy individuals Protocol Number C4591001 Accessed online from [www.pfizer.com](http://www.pfizer.com) on January 11, 2021.
48. Crum-Cianflone NF, Wallace MR. Vaccination in HIV-infected adults. *AIDS Patient Care STDS*. 2014;28(8):397-410.
49. Ding S, Laumaea A, Benlarbi M, et al. Antibody Binding to SARS-CoV-2 S Glycoprotein Correlates with but Does Not Predict Neutralization. *Viruses*. 2020;12(11).
50. Beaudoin-Bussieres G, Laumaea A, Anand SP, et al. Decline of Humoral Responses against SARS-CoV-2 Spike in Convalescent Individuals. *mBio*. 2020;11(5).
51. Prevost J, Gasser R, Beaudoin-Bussieres G, et al. Cross-Sectional Evaluation of Humoral Responses against SARS-CoV-2 Spike. *Cell Rep Med*. 2020;1(7):100126.
52. Grifoni A, Weiskopf D, Ramirez SI, et al. Targets of T Cell Responses to SARS-CoV-2 Coronavirus in Humans with COVID-19 Disease and Unexposed Individuals. *Cell*. 2020;181(7):1489-1501 e1415.
53. Perreault J, Tremblay T, Fournier MJ, et al. Waning of SARS-CoV-2 RBD antibodies in longitudinal convalescent plasma samples within 4 months after symptom onset. *Blood*. 2020;136(22):2588-2591.
54. Rocheleau L LG, Fu K, Cote M, Giguere PM, Langlois MA, Pelchat M. Consistent and high-frequency identification of an intra-sample genetic variant of SARS-CoV2 with elevated fusogenic properties. *Biox*. <https://doi.org/10.1101/2020.12.03.409714>.
55. Cao Y, Qiu Y, Tu G, Yang C. Single-cell RNA Sequencing in Immunology. *Curr Genomics*. 2020;21(8):564-575.

- 1
- 2
- 3 56. Mehraj V, Ramendra R, Isnard S, et al. Circulating (1-->3)-beta-D-glucan Is Associated
- 4 With Immune Activation During Human Immunodeficiency Virus Infection. *Clin Infect*
- 5 *Dis.* 2020;70(2):232-241.
- 6
- 7 57. Cook IF. Sexual dimorphism of humoral immunity with human vaccines. *Vaccine.*
- 8 2008;26(29-30):3551-3555.
- 9
- 10 58. Cook IF. Sex differences in injection site reactions with human vaccines. *Hum Vaccin.*
- 11 2009;5(7):441-449.
- 12
- 13 59. Saadat S, Rikhtegaran Tehrani Z, Logue J, et al. Binding and Neutralization Antibody
- 14 Titers After a Single Vaccine Dose in Health Care Workers Previously Infected With
- 15 SARS-CoV-2. *JAMA.* 2021;325(14):1467-1469.
- 16
- 17 60. Blain H, Tuailon E, Gamon L, et al. Spike Antibody Levels of Nursing Home Residents
- 18 With or Without Prior COVID-19 3 Weeks After a Single BNT162b2 Vaccine Dose.
- 19 *JAMA.* 2021.
- 20
- 21 61. 2021 hwoc-c-o-dAm.
- 22
- 23 62. Kinoshita H, Durkee-Shock J, Jensen-Wachspress M, et al. Robust Antibody and T Cell
- 24 Responses to SARS-CoV-2 in Patients with Antibody Deficiency. *J Clin Immunol.* 2021.
- 25
- 26 63. Bajaj V, Gadi N, Spihlman AP, Wu SC, Choi CH, Moulton VR. Aging, Immunity, and
- 27 COVID-19: How Age Influences the Host Immune Response to Coronavirus Infections?
- 28 *Front Physiol.* 2020;11:571416.
- 29
- 30 64. Gustafson CE, Kim C, Weyand CM, Goronzy JJ. Influence of immune aging on vaccine
- 31 responses. *J Allergy Clin Immunol.* 2020;145(5):1309-1321.
- 32
- 33 65. Poonia B, Kottlilil S. Immune Correlates of COVID-19 Control. *Front Immunol.*
- 34 2020;11:569611.
- 35
- 36 66. Walsh EE, Frenck RW, Jr., Falsey AR, et al. Safety and Immunogenicity of Two RNA-
- 37 Based Covid-19 Vaccine Candidates. *N Engl J Med.* 2020;383(25):2439-2450.
- 38
- 39 67. Wong C, Althoff K, Gange SJ. Identifying the appropriate comparison group for HIV-
- 40 infected individuals. *Curr Opin HIV AIDS.* 2014;9(4):379-385.
- 41
- 42 68. Helleberg M, Afzal S, Kronborg G, et al. Mortality attributable to smoking among HIV-
- 43 1-infected individuals: a nationwide, population-based cohort study. *Clin Infect Dis.*
- 44 2013;56(5):727-734.
- 45
- 46 69. Altice FL, Kamarulzaman A, Soriano VV, Schechter M, Friedland GH. Treatment of
- 47 medical, psychiatric, and substance-use comorbidities in people infected with HIV who
- 48 use drugs. *Lancet.* 2010;376(9738):367-387.
- 49
- 50 70. Triant VA, Lee H, Hadigan C, Grinspoon SK. Increased acute myocardial infarction rates
- 51 and cardiovascular risk factors among patients with human immunodeficiency virus
- 52 disease. *J Clin Endocrinol Metab.* 2007;92(7):2506-2512.
- 53
- 54
- 55
- 56
- 57
- 58
- 59
- 60

### Authors' contributions

Co-principal investigators of the study are CTC, CLC and AHA. CTC and CLC conceived the study, led the proposal and protocol development. CTC wrote the first draft of the manuscript. JS is the biostatistician who provided methodological expertise and performed sample size

1  
2  
3 calculations. All other authors, including ANB, JN, IK, SM, EM, MAO, CMK, DHST, SLW, MH,  
4  
5 MWH and JBA contributed to protocol development, study design and development of the  
6  
7 proposal. CTC, MAL, MAJ, MAO, MAB, and ZLB designed the laboratory evaluations. MAL  
8  
9 will be responsible for studies on humoral immunity. MAJ will be responsible for flow cytometric  
10  
11 studies to define proportions of immune cells and their subsets, while CTC will be responsible for  
12  
13 cytokine assessment. MAB and ZLB will be responsible for RNA profiling. MAL and MAB will  
14  
15 perform the analysis of antibodies to COVID-19 variants. MAO and MAB will perform analyses  
16  
17 of T cell responses to vaccine immunogens. Markers of gut barrier damage, microbial  
18  
19 translocation and CMV IgG titers will be performed by JPR. HLA typing will be performed as  
20  
21 necessary for participants evaluated for T cell responses by MAO, ZLB and MAB. JS will oversee  
22  
23 data analysis between groups and subgroup analyses. All authors critically reviewed and approved  
24  
25 the final manuscript.  
26  
27  
28  
29  
30  
31  
32  
33

### 34 **Acknowledgements**

35  
36 The authors thank all of the CTN staff who were involved in the planning and preparation of this  
37  
38 study, in addition to the CTN Scientific Review Committee and the Community Advisory Board,  
39  
40 for their expedited review and helpful comments.  
41  
42

43 CTC is supported by a Fonds de recherche du Québec-Santé (FRQS) Junior 2 career award. AB  
44  
45 holds a Canada Research Chair Tier 2 Canada Research Chair (CRC) in sexually transmitted  
46  
47 infection (STI) Prevention. MAL holds a CRC in Molecular Virology and Intrinsic Immunity.  
48  
49 MAJ holds a CRC, Tier 2, in human immunovirology. SW is supported by a Research Chair in  
50  
51 HIV Clinical Care and Aging from the Ontario HIV Treatment Network. DT is supported by a  
52  
53 Tier 2 CRC in HIV Prevention and STI Research. MAB holds a Canada Research Chair, Tier 2,  
54  
55  
56  
57  
58  
59  
60

1  
2  
3 in viral pathogenesis and immunity. ZLB holds a Scholar Award from the Michael Smith  
4 Foundation for Health Research. JPR holds a Lowenstein Chair in Hematology.  
5  
6  
7  
8  
9  
10

### 11 **Funding**

12  
13 This project is being supported by funding from the Public Health Agency of Canada, through the  
14 Vaccine Surveillance Reference group and the COVID-19 Immunity Task Force (grant number:  
15 N/A) and the CIHR CTN (grant number: N/A).  
16  
17  
18  
19  
20  
21  
22  
23

### 24 **Competing interests**

25  
26 The authors declare that they have no competing interests  
27  
28  
29  
30  
31  
32  
33  
34  
35  
36  
37  
38  
39  
40  
41  
42  
43  
44  
45  
46  
47  
48  
49  
50  
51  
52  
53  
54  
55  
56  
57  
58  
59  
60



**Table 1: Visits and Procedure Schedule**

| Visit number                               | 1 <sup>1</sup><br>(Screen) | Vaccine | 2       | Vaccine | 3 <sup>6</sup>       | 4 <sup>6</sup>       | 5 <sup>6</sup>           |
|--------------------------------------------|----------------------------|---------|---------|---------|----------------------|----------------------|--------------------------|
| Week Number                                | -12 to 0<br>weeks          | 0       | 4 weeks |         | 3 mo after<br>dose 2 | 6 mo after<br>dose 2 | 12 mo<br>after dose<br>2 |
| Window                                     | -3 mo                      |         |         |         |                      |                      |                          |
| Inclusion/Exclusion                        | X                          |         | X       |         |                      |                      |                          |
| Informed Consent                           | X                          |         |         |         |                      |                      |                          |
| Medical History                            | X                          |         |         |         |                      |                      |                          |
| Blood: Immunology <sup>2</sup>             | X                          |         | X       |         | X                    | X                    | X                        |
| Blood Draw:<br>CD4/Viral Load <sup>3</sup> | X                          |         | X       |         | X                    | X                    | X                        |
| Vaccination <sup>4</sup>                   |                            | X       |         | X       |                      |                      |                          |
| Participant Diary <sup>5</sup>             |                            | X       | X       | X       | X                    |                      |                          |
| CITF <sup>7</sup><br>Questionnaire         | X                          |         | X       |         | X                    | X                    | X                        |
| Adverse Events <sup>8</sup>                |                            |         | X       |         | X                    |                      |                          |
| Concomitant Meds                           | X                          |         | X       |         | X                    | X                    | X                        |

1  
2  
3 <sup>1</sup>Screening assessment may be performed same day as vaccination but will be completed  
4 prior to vaccination.

5  
6  
7  
8 <sup>2</sup>Immunoglobulin levels flow cytometry and cytokine secretion (immunogenicity  
9  
10 measures); Will be collected at each visit. For participants who have already received a  
11  
12 vaccine dose prior to study enrolment, “baseline” immunoglobulin levels (i.e., pre-  
13  
14 vaccination) may not be available.

15  
16  
17 <sup>3</sup>Blood work such as CD4 and Viral load can be collected as part of standard of care

18  
19 <sup>4</sup>Participants will receive the COVID-19 vaccine outside of the study per standard of care  
20  
21 as part of their provincial immunization program.

22  
23  
24 <sup>5</sup>Participants will be given a printed diary after vaccination during which they will record  
25  
26 their vaccine reactions, oral temperature and any febrile respiratory tract symptoms as  
27  
28 well as general changes to health and medications. The diary will be evaluated up to 30  
29  
30 days following each injection.

31  
32  
33 <sup>6</sup>Visits 3, 4, 5 will be conducted at 3, 6, 12 months after dose 1 respectively, for COVID-  
34  
35 19 vaccines administered as a one-dose schedule.

36  
37  
38 <sup>7</sup>The full CITF questionnaire will be completed at visit 1 and the modified CITF  
39  
40 questionnaire will be completed at subsequent visits.

41  
42 <sup>8</sup>Adverse events will only be collected at 7 and 30 days post vaccination and for  
43  
44 participants who receive a vaccine while currently enrolled in the study (i.e. adverse  
45  
46 events will not be collected retrospectively)

47  
48  
49 For participants who develop COVID19-symptoms 14+ days following vaccination.

50  
51 Participants will be asked to complete the COVID-19 Symptom Survey (Supplementary  
52  
53 materials) and to go for a COVID-19 test at their nearest test centre and notify the study  
54  
55

1  
2  
3 staff of their test result. If positive for COVID-19, the study staff will mail the participant  
4  
5 6 saliva collection kits by courier in order to collect information on SARS-CoV-2  
6  
7  
8 variants  
9

10 Participants who have already received 1 vaccine dose: These individuals may be  
11  
12 enrolled in the study at any duration of time post first dose as long as the baseline blood  
13  
14 drawn is before the second booster. Visits 1 and 2 will be combined.  
15  
16

17  
18  
19 Participants who have already received 2 vaccine doses: These individuals must be  
20  
21 enrolled in the study within 3 months of their 2<sup>nd</sup> dose. Visits 1 and 3 will be combined  
22  
23 and Visit 2 will not be required. Participants will follow-up at visits 4 and 5.  
24  
25  
26  
27  
28  
29  
30  
31  
32  
33  
34  
35  
36  
37  
38  
39  
40  
41  
42  
43  
44  
45  
46  
47  
48  
49  
50  
51  
52  
53  
54  
55  
56  
57  
58  
59  
60

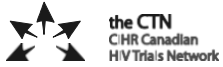

the CTN  
CHR Canadian  
HIV Trials Network

le Réseau  
Réseau canadien  
pour les essais VIH des IRSC

CTN 328  
HIV-COV

DATA COLLECTION  
WORKSHEET

Participant ID

|  |  |  |  |  |  |
|--|--|--|--|--|--|
|  |  |  |  |  |  |
|--|--|--|--|--|--|

Vaccine 1

Vaccine 2

## COVID-19 SYMPTOMS QUESTIONNAIRE

Have you experienced any of the following COVID-19 signs or symptoms?

| Sign                         | Yes | No | If yes, provide date, time |
|------------------------------|-----|----|----------------------------|
| Fever, chills                |     |    |                            |
| Cough                        |     |    |                            |
| Shortness of breath          |     |    |                            |
| Acute loss of smell or taste |     |    |                            |
| Fatigue                      |     |    |                            |
| Headache                     |     |    |                            |
| Muscle aches                 |     |    |                            |
| Nausea/Vomiting/Diarrhea     |     |    |                            |
| General weakness             |     |    |                            |
| Nasal congestion             |     |    |                            |
| Sore throat                  |     |    |                            |

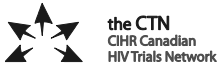

le Réseau  
Réseau canadien  
pour les essais VIH des IRSC

CTN 328  
HIV-COV

DATA COLLECTION  
WORKSHEET

Participant ID

|  |  |  |  |  |  |
|--|--|--|--|--|--|
|  |  |  |  |  |  |
|--|--|--|--|--|--|

Vaccine 1

Vaccine 2

**PARTICIPANT DIARY**

Following each injection of COVID-19 vaccine, please indicate whether you experienced any of the following, within 7 days and within 30 days, and indicate the severity. See the Other Signs or Symptoms worksheet for a guide to the severity levels.

|                                                  | Date:  | Date: | Date: | Date: | Date: | Date: | Date: | Date: |                |
|--------------------------------------------------|--------|-------|-------|-------|-------|-------|-------|-------|----------------|
| Sign or Symptom                                  | Day 0* | Day 1 | Day 2 | Day 3 | Day 4 | Day 5 | Day 6 | Day 7 | Within 30 days |
| Pain at injection site                           |        |       |       |       |       |       |       |       |                |
| Redness                                          |        |       |       |       |       |       |       |       |                |
| Swelling                                         |        |       |       |       |       |       |       |       |                |
| Lymphadenopathy/Axillary swelling and tenderness |        |       |       |       |       |       |       |       |                |
| Fatigue                                          |        |       |       |       |       |       |       |       |                |
| Headache                                         |        |       |       |       |       |       |       |       |                |
| Muscle Pain                                      |        |       |       |       |       |       |       |       |                |
| Chills                                           |        |       |       |       |       |       |       |       |                |
| Joint pain                                       |        |       |       |       |       |       |       |       |                |
| Fever                                            |        |       |       |       |       |       |       |       |                |
| Diarrhea                                         |        |       |       |       |       |       |       |       |                |
| Nausea and/or Vomiting                           |        |       |       |       |       |       |       |       |                |

\* Day 0 refers to day vaccine received, Day 1 is the *following day*, and so forth

For peer review only - <http://bmjopen.bmj.com/site/about/guidelines.xhtml>

Initials: \_\_\_\_\_

Date: \_\_\_\_\_

Page \_\_\_\_ of \_\_\_\_







the CTN  
CIHR Canadian  
HIV Trials Network

le Réseau  
Réseau canadien  
pour les essais VIH des IRSC

# CTN 328: HIV-COV

## CITF CDE BASELINE QUESTIONNAIRE

**This version is only administered at Screening**

*Please answer all questions unless otherwise indicated*

**Participant ID:** \_\_\_\_\_

### Section 1: Demographics

1. Date (DD-MMM-YYYY):

\_\_\_\_ / \_\_\_\_ / \_\_\_\_\_

2. What is your age?

\_\_\_\_\_ YRS    \_\_\_\_\_ MO    OR     Prefer not to answer

3. What was your assigned sex at birth?

- Male
- Female
- Prefer to self-describe (specify) \_\_\_\_\_
- Prefer not to answer

4. What is your sex now?

- Male
- Female
- Prefer to self-describe (specify) \_\_\_\_\_
- Prefer not to answer



1  
2  
3 5. What is your gender (how do you currently self-identify)?  
4

- 5  Male  
6  Female  
7  Non-binary, genderqueer, agender or a similar identity  
8  Two-spirit  
9  Prefer to self-describe (specify) \_\_\_\_\_  
10  Prefer not to answer  
11  
12

13 6. Are you an Indigenous person originating from North America?  
14

15 [If NO or Prefer not to answer, please proceed to Q9](#)

- 16  No  
17  Yes  
18  Prefer not to answer  
19  
20

21 7. Which of the following groups do you belong to? Please select all that apply.  
22

23 [Only answer if Q6 = YES](#)

- 24  First Nations  
25  Inuit  
26  Metis  
27  Non-status First Nations  
28  Other Indigenous (specify) \_\_\_\_\_  
29  Prefer not to answer  
30  
31  
32

33 8. Do you live on reserve?  
34

35 [Only answer if Q7 = First Nations](#)

- 36  Yes  
37  No  
38  Prefer not to answer  
39  
40

41 9. How would you describe your ethnicity or race? Please select all that apply.  
42

43 If you are an Indigenous person and answered YES to Q6, select any other that apply.  
44

- |                                             |                                                            |
|---------------------------------------------|------------------------------------------------------------|
| 45 <input type="checkbox"/> White           | <input type="checkbox"/> West Asian                        |
| 46 <input type="checkbox"/> South Asian     | <input type="checkbox"/> Korean                            |
| 47 <input type="checkbox"/> Chinese         | <input type="checkbox"/> Japanese                          |
| 48 <input type="checkbox"/> Black           | <input type="checkbox"/> Prefer to self-describe (specify) |
| 49 <input type="checkbox"/> Filipino        | _____                                                      |
| 50 <input type="checkbox"/> Latin American  | <input type="checkbox"/> Prefer not to answer              |
| 51 <input type="checkbox"/> Arab            |                                                            |
| 52 <input type="checkbox"/> Southeast Asian |                                                            |
| 53                                          |                                                            |
| 54                                          |                                                            |
| 55                                          |                                                            |
| 56                                          |                                                            |
| 57                                          |                                                            |
| 58                                          |                                                            |

1  
2  
3 10. What are the first three digits of your postal code?  
4

5 \_\_\_\_\_ OR  Prefer not to answer  
6  
7

8  
9 11. What is the highest level of education you have completed?  
10

- 11  Less than high school graduation  
12  High school graduation  
13  Trade certificate, vocational school, or apprenticeship training  
14  Non-university certificate or diploma from a community college, CEGEP  
15  University Bachelor's degree  
16  University graduate degree (Master's, Doctorate, etc.)  
17  Prefer not to answer  
18  
19

20 12. How many people live in your household, including yourself?  
21

22 \_\_\_\_\_ OR  Prefer not to answer  
23  
24

25  
26 13. How many bedrooms are in your household?  
27

28 \_\_\_\_\_ OR  Prefer not to answer  
29  
30

31  
32 14. How many bathrooms are in your household?  
33

34 \_\_\_\_\_ OR  Prefer not to answer  
35  
36

37  
38 **Section 2: COVID-19**

39 15. Do you think you have had COVID-19?  
40

41 [If NO or Prefer not to answer, please proceed to Q18](#)  
42

- 43  No  
44  Yes  
45  Prefer not to answer  
46  
47  
48  
49  
50  
51  
52  
53  
54  
55  
56  
57  
58

1  
2  
3 16. Why do you think you have had COVID-19? Please select all that apply.  
4

5 [Only answer if Q15 = YES](#)

- 6  
7  Symptom review online  
8  Symptom profile  
9  Nasal/throat test result  
10  Health care provider  
11  Contact with case  
12  Other (specify) \_\_\_\_\_  
13  Prefer not to answer  
14  
15

16 17. Were you hospitalized due to COVID-19?  
17

18 [Only answer if Q15 = YES](#)

- 19  
20  No  
21  Yes  
22  Prefer not to answer  
23

24 18. Have you ever been tested for an active COVID-19 infection (using nasopharyngeal/throat swab, saliva, or  
25 gargle test)?  
26

27 [If NO or Prefer not to answer, please proceed to Q21](#)

- 28  
29  No  
30  Yes  
31  Prefer not to answer  
32

33 19. If yes, how many times have you been tested?  
34

35 [Only answer if Q18 = YES](#)

36 \_\_\_\_\_ OR  Prefer not to answer  
37  
38

39 20.1 Answer the following questions about the **first COVID-19 test**, if applicable.  
40

41 20.1.a What was the date of the **first** test?  
42

43 \_\_\_\_\_ DD / \_\_\_\_\_ MO / \_\_\_\_\_ YR  
44

45 20.1.b What was the result of the **first** test?  
46

- 47  Negative  
48  Positive  
49  Don't know  
50  
51  
52  
53  
54  
55  
56  
57  
58

1  
2  
3 20.1.c Did you have any symptoms of COVID when you had this test?  
4

- 5  No  
6  Yes  
7  Don't know  
8  
9

10 20.1.d If yes, what symptoms did you have?  
11

12 [Only answer if Q20.1.c = YES](#)  
13

- 14  Cough  
15  Fever  
16  Shortness of breath  
17  Sore muscles  
18  Headache  
19  Sore throat  
20  Diarrhea  
21  Decreased sense of smell or taste  
22  Other (specify) \_\_\_\_\_  
23  
24  
25

26 20.2 Answer the following questions about the **second COVID-19 test**, if applicable.  
27

28 20.2.a What was the date of the **second** test?  
29

30 \_\_\_\_\_ DD / \_\_\_\_\_ MO / \_\_\_\_\_ YR  
31

32 20.2.b What was the result of the **second** test?  
33

- 34  Negative  
35  Positive  
36  Don't know  
37

38 20.2.c Did you have any symptoms of COVID when you had this test?  
39

- 40  No  
41  Yes  
42  Don't know  
43  
44  
45  
46  
47  
48  
49  
50  
51  
52  
53  
54  
55  
56  
57  
58

1  
2  
3 20.2.d If yes, what symptoms did you have?  
4

5 [Only answer if Q20.2.c = YES](#)  
6

- 7  
8  Cough  
9  Fever  
10  Shortness of breath  
11  Sore muscles  
12  Headache  
13  Sore throat  
14  Diarrhea  
15  Decreased sense of smell or taste  
16  Other (specify) \_\_\_\_\_  
17  
18  
19

20 20.3 Answer the following questions about the **third COVID-19 test**, if applicable.

21 20.3.a What was the date of the **third** test?  
22

23 \_\_\_\_\_ DD / \_\_\_\_\_ MO / \_\_\_\_\_ YR  
24

25 20.3.b What was the result of the **third** test?  
26

- 27  Negative  
28  Positive  
29  Don't know  
30

31 20.3.c Did you have any symptoms of COVID when you had this test?  
32

- 33  No  
34  Yes  
35  Don't know  
36  
37

38 20.3.d If yes, what symptoms did you have?  
39

40 [Only answer if Q20.3.c = YES](#)  
41

- 42  
43  Cough  
44  Fever  
45  Shortness of breath  
46  Sore muscles  
47  Headache  
48  Sore throat  
49  Diarrhea  
50  Decreased sense of smell or taste  
51  Other (specify) \_\_\_\_\_  
52  
53  
54  
55  
56  
57  
58

1  
2  
3 20.4.a Have you **tested positive** for COVID-19 (using nasopharyngeal, throat swab, saliva or gargle test) on a  
4 test that wasn't included the questions above (that is, on the **4th or later test**)?  
5

6 [If NO, please proceed to Q21](#)

- 7  
8  No  
9  Yes  
10

11 20.4.b If yes, what was the date the first time you tested positive?

12  
13 [Only answer if Q20.4.a = YES](#)

14  
15 \_\_\_\_ DD / \_\_\_\_ MO \_\_\_\_ YR  
16  
17

18  
19 **Section 3: Exposure**

20  
21 21.a Have you traveled outside of your home province since **January 2020**?

22 [If NO, please proceed to Q23](#)

- 23  
24  No  
25  Yes  
26  Prefer not to answer  
27

28  
29 21.b If you think you had COVID, did you travel in the 6 months before your symptoms began?

30 [Only answer if Q15 = YES](#)

- 31  
32  No  
33  Yes  
34  Prefer not to answer  
35  
36  
37  
38  
39  
40  
41  
42  
43  
44  
45  
46  
47  
48  
49  
50  
51  
52  
53  
54  
55  
56  
57  
58

22. What province(s)/territory(ies) or country(ies) did you travel to? Select all that apply.

Only answer if Q21.a or Q21.b = YES

- Alberta
- British Columbia
- Manitoba
- New Brunswick
- Newfoundland and Labrador
- Northwest Territories
- Nova Scotia
- Nunavut
- Ontario
- Prince Edward Island
- Quebec
- Saskatchewan
- Yukon

OR  Prefer not to answer

List countries you travelled to (separated by a comma):

---



---



---



---



---

23.a Do you do either paid or unpaid work in an environment where you work in close proximity to other people?

If NO or Prefer not to answer, please proceed to Q24

- No
- Yes
- Prefer not to answer

23.b If yes, have you been working in any of the following occupations or worksites in the past year? Please select all that apply.

Only answer if Q23.a = YES

- |                                                                                 |                                                |
|---------------------------------------------------------------------------------|------------------------------------------------|
| <input type="checkbox"/> Hospital or health care facility                       | <input type="checkbox"/> Pharmacy              |
| <input type="checkbox"/> First responder (paramedic/firefighter/police officer) | <input type="checkbox"/> Hairdresser or barber |
| <input type="checkbox"/> Childcare worker                                       | <input type="checkbox"/> Aesthetician          |
| <input type="checkbox"/> Correctional officer                                   | <input type="checkbox"/> Flight attendant      |
| <input type="checkbox"/> Teacher or other school staff                          | <input type="checkbox"/> Factor worker         |
| <input type="checkbox"/> Transit driver                                         | <input type="checkbox"/> Other (specify) _____ |
| <input type="checkbox"/> Food service industry                                  | <input type="checkbox"/> Prefer not to answer  |
| <input type="checkbox"/> Grocery store                                          |                                                |

1  
2  
3 24.a How many times have you been in a gathering of 10 or more since **March 2020**?

4 \_\_\_\_\_ OR  Prefer not to answer

5  
6  
7 24.b If you think you have had COVID, how many times were you in gatherings of more than 10 people in the 6  
8 months before your symptoms began?

9  
10 [Only answer if Q15 = YES](#)

11 \_\_\_\_\_ OR  Prefer not to answer

12  
13  
14  
15  
16 **Section 4: Health and Health Behaviours**

17 25. Do you currently smoke tobacco?

- 18  
19  No  
20  Yes  
21  Prefer not to answer  
22  
23

24 26. If yes, how often do you smoke tobacco?

25  
26 [Only answer if Q25 = YES](#)

- 27  Less than daily  
28  Daily  
29  
30

31 27. Do you currently use e-cigarettes (vape)?

- 32  No  
33  Yes  
34  Prefer not to answer  
35  
36

37 28. If yes, how often do you use e-cigarettes (vape)?

38  
39 [Only answer if Q27 = YES](#)

- 40  Less than daily  
41  Daily  
42  
43  
44  
45  
46  
47  
48  
49  
50  
51  
52  
53  
54  
55  
56  
57  
58



29. Have you been diagnosed by a physician with any of the following chronic medical conditions? Please provide an answer for each condition.

|    |                               | Yes | No | Don't Know | Prefer not to answer |
|----|-------------------------------|-----|----|------------|----------------------|
| a. | Hypertension                  |     |    |            |                      |
| b. | Diabetes                      |     |    |            |                      |
| c. | Asthma                        |     |    |            |                      |
| d. | Chronic Lung Disease          |     |    |            |                      |
| e. | Chronic Heart Disease         |     |    |            |                      |
| f. | Chronic Kidney Disease        |     |    |            |                      |
| g. | Liver Disease                 |     |    |            |                      |
| h. | Cancer                        |     |    |            |                      |
| i. | Chronic Blood Disorder        |     |    |            |                      |
| j. | Immune Suppressed             |     |    |            |                      |
| k. | Chronic Neurological Disorder |     |    |            |                      |

30. What is your current weight (circle units)?

\_\_\_\_\_ kg / lbs      OR       Prefer not to answer

31. What is your current height?

\_\_\_\_ . \_\_\_\_ \_\_\_\_ m      OR      \_\_\_\_ ft \_\_\_\_ \_\_\_\_ in      OR       Prefer not to answer

32. Do you have a family physician/primary care provider?

- No  
 Yes  
 Don't know  
 Prefer not to answer

33. Do you usually get a flu shot?

- No  
 Yes  
 Prefer not to answer

34. Indicate if, or how often you have done the following since **March 2020**?

|    |                                                                                           | Never | Rarely | Occasionally | Often                | Always | Prefer not to answer |                      |
|----|-------------------------------------------------------------------------------------------|-------|--------|--------------|----------------------|--------|----------------------|----------------------|
| a. | Worn a mask in public places                                                              |       |        |              |                      |        |                      |                      |
| b. | Practiced physical distancing in public places                                            |       |        |              |                      |        |                      |                      |
| c. | Avoided crowded places/gatherings                                                         |       |        |              |                      |        |                      |                      |
| d. | Avoided common greetings (such as a handshake or hug)                                     |       |        |              |                      |        |                      |                      |
|    |                                                                                           | Never | Rarely | Occasionally | Often                | Always | N/A                  | Prefer not to answer |
| e. | Limited contact with people at higher risk (e.g., an elderly relative)                    |       |        |              |                      |        |                      |                      |
|    |                                                                                           | No    | Yes    | N/A          | Prefer not to answer |        |                      |                      |
| f. | Self-isolated because you thought you were infected with COVID-19                         |       |        |              |                      |        |                      |                      |
| g. | Self-quarantined because you may have been exposed to COVID-19, but did not show symptoms |       |        |              |                      |        |                      |                      |

35. **If you think you have had COVID**, have you done the following in the **6 months before your symptoms began?** (indicate how often).

Only answer if Q15 = YES

|    |                                                                                           | Never | Rarely | Occasionally | Often | Always               | N/A | Prefer not to answer |
|----|-------------------------------------------------------------------------------------------|-------|--------|--------------|-------|----------------------|-----|----------------------|
| a. | Worn a mask in public places                                                              |       |        |              |       |                      |     |                      |
| b. | Practiced physical distancing in public places                                            |       |        |              |       |                      |     |                      |
| c. | Avoided crowded places/gatherings                                                         |       |        |              |       |                      |     |                      |
| d. | Avoided common greetings (such as handshake or hug)                                       |       |        |              |       |                      |     |                      |
| e. | Limited contact with people at higher risk (e.g., an elderly relative)                    |       |        |              |       |                      |     |                      |
|    |                                                                                           | No    | Yes    | N/A          |       | Prefer not to answer |     |                      |
| f. | Self-isolated because you thought you were infected with COVID-19                         |       |        |              |       |                      |     |                      |
| g. | Self-quarantined because you may have been exposed to COVID-19, but did not show symptoms |       |        |              |       |                      |     |                      |

**Section 5: Vaccine**

36. Have you been vaccinated against COVID-19? Answer YES if you have received at least one dose of the COVID-19 vaccine.

[If NO or Prefer not to answer, proceed to Q43](#)

- No  
 Yes  
 Prefer not to answer

37. How many doses of the COVID-19 vaccine have you received so far?

[Only answer if Q36 = YES](#)

- One  
 Two  
 More than two

38. When did you receive the **first dose** of the COVID-19 vaccine?

[Only answer if Q36 = YES](#)

\_\_\_\_ DD / \_\_\_\_ MM / \_\_\_\_\_ YR

39. When did you receive the **second dose** of the COVID-19 vaccine?

[Only answer if Q37 = TWO or MORE THAN TWO](#)

\_\_\_\_ DD / \_\_\_\_ MM / \_\_\_\_\_ YR

40. Which vaccine did you receive?

[Only answer if Q36 = YES](#)

- Pfizer and BioNTech mRNA vaccine  
 Moderna mRNA vaccine  
 AstraZeneca Oxford vaccine  
 Other (specify) \_\_\_\_\_  
 Janssen (Johnson & Johnson) vaccine  
 Don't know  
 Prefer not to answer

41. Were you pregnant when you received the vaccine?

[If NO or N/A, proceed to Q43](#)

- No  
 Yes  
 N/A

42. If yes, what trimester were you in when you received the vaccine?

Only answer if Q41 = YES

- First  
 Second  
 Third

### **Section 6: Cannabis Use**

43. Have you used cannabis (even once) in the past 12 months?

If NO, proceed to the end of this questionnaire

- No  
 Yes

43.a If yes, how do you use cannabis? Please check all that apply.

Only answer if Q43 = YES

|                                    | Yes | No |
|------------------------------------|-----|----|
| Smoked dried plant                 |     |    |
| Vaporized                          |     |    |
| Oil                                |     |    |
| Pills                              |     |    |
| Added to baked good or other foods |     |    |
| Other (specify)                    |     |    |

43.b If you smoke cannabis, please specify how you smoked/took cannabis:

- I do not smoke cannabis (proceed to Q44)

|                                               | Yes | No |
|-----------------------------------------------|-----|----|
| Smoked as joint                               |     |    |
| Smoked as joint mixed with tobacco            |     |    |
| Smoked as pipe                                |     |    |
| Smoked as water pipe (bong)                   |     |    |
| Inhaled using a vaporizer                     |     |    |
| Eaten (e.g. as brownies, cake, cookies, etc.) |     |    |
| Other (specify)                               |     |    |

1  
2  
3 44. Which response **best** describes how often you **currently** use cannabis?  
4

5 [Only answer if Q43 = YES](#)

- 6  
7  Rarely (2-3 times a year)  
8  Monthly  
9  Weekly  
10  Daily  
11  More than once a day  
12

13  
14 45. How many grams per week do you consume?

15 [Only answer if Q43 = YES](#)

- 16  
17  Less than 1 gram  
18  1-5 grams  
19  6-9 grams  
20  10 or more grams  
21  Unknown  
22  
23

24 46. If you smoke cannabis, on average how many joints/cigarettes do you smoke per day?  
25

26 [Only answer if Q43 = YES](#)

27 \_\_\_\_\_ OR  I do not smoke cannabis  
28  
29  
30  
31  
32

33 **END OF QUESTIONNAIRE**  
34  
35  
36  
37  
38  
39  
40  
41  
42  
43  
44  
45  
46  
47  
48  
49  
50  
51  
52  
53  
54  
55  
56  
57  
58  
59  
60



the CTN  
CIHR Canadian  
HIV Trials Network

le Réseau  
Réseau canadien  
pour les essais VIH des IRSC

## CTN 328: HIV-COV

### CITF CDE FOLLOW-UP QUESTIONNAIRE

**This version is administered at Visits 2, 3, 4, 5, and at unscheduled visits**

*Please answer all questions unless otherwise indicated*

**Participant ID:** \_\_\_\_\_

1. Date (DD-MMM-YYYY):

\_\_\_\_ / \_\_\_\_ / \_\_\_\_\_

#### **Section 1: COVID-19**

2. Do you think you have had COVID-19 since your last visit?

If NO or Prefer not to answer, please proceed to Q5

- No  
 Yes  
 Prefer not to answer

3. Why do you think you have had COVID-19 since your last visit? Please select all that apply.

Only answer if Q2 = YES

- Symptom review online  
 Symptom profile  
 Nasal/throat test result  
 Health care provider  
 Contact with case  
 Other (specify) \_\_\_\_\_  
 Prefer not to answer

1  
2  
3 4. Since your last visit, have you been hospitalized due to COVID-19?  
4

5 [Only answer if Q2 = YES](#)

- 6  
7  No  
8  Yes  
9  Prefer not to answer  
10

11  
12 5. Since your last visit, have you been tested for an active COVID-19 infection (using nasopharyngeal/throat  
13 swab, saliva, or gargle test)?  
14

15 [If NO or Prefer not to answer, please proceed to Q8](#)

- 16  
17  No  
18  Yes  
19  Prefer not to answer  
20

21  
22 6. If yes, how many times have you been tested since your last visit?  
23

24 [Only answer if Q5 = YES](#)

25 \_\_\_\_\_ OR  Prefer not to answer  
26  
27  
28  
29

30 7.1 Answer the following questions about the **first COVID-19 test since your last visit**, if applicable.  
31

32 7.1.a What was the date of the **first** test?  
33

34 \_\_\_\_\_ DD / \_\_\_\_\_ MO / \_\_\_\_\_ YR  
35

36 7.1.b What was the result of the **first** test?  
37

- 38  Negative  
39  Positive  
40  Don't know  
41

42 7.1.c Did you have any symptoms of COVID when you had this test?  
43

- 44  No  
45  Yes  
46  Don't know  
47  
48  
49  
50  
51  
52  
53  
54  
55  
56  
57  
58



1  
2  
3 7.1.d If yes, what symptoms did you have?  
4

5 Only answer if Q7.1.c = YES  
6

- 7  
8  Cough  
9  Fever  
10  Shortness of breath  
11  Sore muscles  
12  Headache  
13  Sore throat  
14  Diarrhea  
15  Decreased sense of smell or taste  
16  Other (specify) \_\_\_\_\_  
17  
18  
19  
20

21  
22 7.2 Answer the following questions about the **second COVID-19 test since your last visit**, if applicable.

23 7.2.a What was the date of the **second** test?  
24

25 \_\_\_\_\_ DD / \_\_\_\_\_ MO / \_\_\_\_\_ YR  
26

27 7.2.b What was the result of the **second** test?  
28

- 29  Negative  
30  Positive  
31  Don't know  
32

33 7.2.c Did you have any symptoms of COVID when you had this test?  
34

- 35  No  
36  Yes  
37  Don't know  
38  
39

40 7.2.d If yes, what symptoms did you have?  
41

42 Only answer if Q7.2.c = YES  
43

- 44  Cough  
45  Fever  
46  Shortness of breath  
47  Sore muscles  
48  Headache  
49  Sore throat  
50  Diarrhea  
51  Decreased sense of smell or taste  
52  Other (specify) \_\_\_\_\_  
53  
54  
55  
56  
57  
58

7.3 Answer the following questions about the **third COVID-19 test since your last visit**, if applicable.

7.3.a What was the date of the **third** test?

\_\_\_ DD / \_\_\_ MO / \_\_\_ YR

7.3.b What was the result of the **third** test?

- Negative  
 Positive  
 Don't know

7.3.c Did you have any symptoms of COVID when you had this test?

- No  
 Yes  
 Don't know

7.3.d If yes, what symptoms did you have?

Only answer if Q7.3.c = YES

- Cough  
 Fever  
 Shortness of breath  
 Sore muscles  
 Headache  
 Sore throat  
 Diarrhea  
 Decreased sense of smell or taste  
 Other (specify) \_\_\_\_\_

7.4.a Have you **tested positive** for COVID-19 since your last visit on a test that wasn't included the questions above (that is, on the **4th or later test**)?

If NO, please proceed to Q8

- No  
 Yes

7.4.b If yes, what was the date the first time you tested positive since your last visit?

Only answer if Q7.4.a = YES

\_\_\_ DD / \_\_\_ MO \_\_\_ YR

## Section 2: Exposure

8. Have you traveled outside of your home province since your last visit?

- No  
 Yes  
 Prefer not to answer

9.a Since your last visit, have you worked (either paid or unpaid) in an environment where you work in close proximity to other people?

[If NO or Prefer not to answer, please proceed to Q10](#)

- No  
 Yes  
 Prefer not to answer

9.b If yes, have you been working in any of the following occupations or worksites since your last visit? Please select all that apply.

[Only answer if Q9.a = YES](#)

- Hospital or health care facility  
 First responder (paramedic/firefighter/police officer)  
 Childcare worker  
 Correctional officer  
 Teacher or other school staff  
 Transit driver  
 Food service industry  
 Grocery store  
 Pharmacy  
 Hairdresser or barber  
 Aesthetician  
 Flight attendant  
 Factor worker  
 Other (specify) \_\_\_\_\_  
 Prefer not to answer

10. How many times have you been in a gathering of 10 or more since your last visit?

\_\_\_\_\_ OR  Prefer not to answer

### **Section 3: Vaccine**

11. Have you been vaccinated against COVID-19 since your last visit? Answer YES if you have **received at least one dose of the COVID-19 vaccine since your last visit.**

If NO or Prefer not to answer, proceed to the end of this questionnaire

- No
- Yes
- Prefer not to answer

12. How many doses of the COVID-19 vaccine have you received since your last visit?

Only answer if Q11 = YES

- One
- Two
- More than two

13. When did you receive the **first dose** of the COVID-19 vaccine since your last visit?

Only answer if Q11= YES

\_\_\_ \_\_\_ DD / \_\_\_ \_\_\_ MM / \_\_\_ \_\_\_ \_\_\_ YR

14. Which vaccine did you receive for this **first dose** since your last visit?

Only answer if Q11= YES

- Pfizer and BioNTech mRNA vaccine
- Moderna mRNA vaccine
- AstraZeneca Oxford vaccine
- Other (specify) \_\_\_\_\_
- Janssen (Johnson & Johnson) vaccine
- Don't know
- Prefer not to answer

15. Were you pregnant when you received this **first dose** since your last visit?

If NO or N/A, proceed to Q17

- No
- Yes
- N/A

1  
2  
3 16. If yes, what trimester were you in when you received this **first dose** since your last visit?

4  
5 [Only answer if Q15 =YES](#)

- 6  
7  First  
8  Second  
9  Third  
10

11  
12  
13 17. When did you receive the **second dose** of the COVID-19 vaccine since your last visit?

14  
15 [Only answer if Q12 = TWO or MORE THAN TWO](#)

16  
17 \_\_\_\_ DD / \_\_\_\_ MM / \_\_\_\_ YR  
18

19  
20 18. Which vaccine did you receive for this **second dose** since your last visit?

21  
22 [Only answer if Q12 = TWO or MORE THAN TWO](#)

- 23  
24  Pfizer and BioNTech mRNA vaccine  
25  Moderna mRNA vaccine  
26  AstraZeneca Oxford vaccine  
27  Other (specify) \_\_\_\_\_  
28  Janssen (Johnson & Johnson) vaccine  
29  Don't know  
30  Prefer not to answer  
31  
32

33  
34 19. Were you pregnant when you received this **second dose** since your last visit?

35  
36 [If NO or N/A, proceed to the end of this questionnaire](#)

- 37  
38  No  
39  Yes  
40  N/A  
41  
42

43  
44 20. If yes, what trimester were you in when you received this **second dose** since your last visit?

45  
46 [Only answer if Q19 =YES](#)

- 47  First  
48  Second  
49  Third  
50  
51

52  
53 **END OF QUESTIONNAIRE**  
54

**STROBE 2007 (v4) Statement—Checklist of items that should be included in reports of *cohort studies***

| Section/Topic                | Item # | Recommendation                                                                                                                                                                       | Reported on page #                                          |
|------------------------------|--------|--------------------------------------------------------------------------------------------------------------------------------------------------------------------------------------|-------------------------------------------------------------|
| <b>Title and abstract</b>    | 1      | (a) Indicate the study's design with a commonly used term in the title or the abstract                                                                                               | 1                                                           |
|                              |        | (b) Provide in the abstract an informative and balanced summary of what was done and what was found                                                                                  | 4-5                                                         |
| <b>Introduction</b>          |        |                                                                                                                                                                                      |                                                             |
| Background/rationale         | 2      | Explain the scientific background and rationale for the investigation being reported                                                                                                 | 6-9                                                         |
| Objectives                   | 3      | State specific objectives, including any prespecified hypotheses                                                                                                                     | 9-10                                                        |
| <b>Methods</b>               |        |                                                                                                                                                                                      |                                                             |
| Study design                 | 4      | Present key elements of study design early in the paper                                                                                                                              | 10-11                                                       |
| Setting                      | 5      | Describe the setting, locations, and relevant dates, including periods of recruitment, exposure, follow-up, and data collection                                                      | 10-15, Table 1                                              |
| Participants                 | 6      | (a) Give the eligibility criteria, and the sources and methods of selection of participants. Describe methods of follow-up                                                           | 11-12                                                       |
|                              |        | (b) For matched studies, give matching criteria and number of exposed and unexposed                                                                                                  | N/A (No matching)                                           |
| Variables                    | 7      | Clearly define all outcomes, exposures, predictors, potential confounders, and effect modifiers. Give diagnostic criteria, if applicable                                             | <a href="#">13</a> , 15-17                                  |
| Data sources/<br>measurement | 8*     | For each variable of interest, give sources of data and details of methods of assessment (measurement). Describe comparability of assessment methods if there is more than one group | 11 (SSO cohort-same time points and methods). 12-13, 15-16, |
| Bias                         | 9      | Describe any efforts to address potential sources of bias                                                                                                                            | 14-15, 22-26 (limitations discussed)                        |
| Study size                   | 10     | Explain how the study size was arrived at                                                                                                                                            | 14                                                          |
| Quantitative variables       | 11     | Explain how quantitative variables were handled in the analyses. If applicable, describe which groupings were chosen and why                                                         | 19                                                          |
| Statistical methods          | 12     | (a) Describe all statistical methods, including those used to control for confounding                                                                                                | <a href="#">14</a> , 19                                     |
|                              |        | (b) Describe any methods used to examine subgroups and interactions                                                                                                                  | 19                                                          |

|                          |     |                                                                                                                                                                                                              |                                               |
|--------------------------|-----|--------------------------------------------------------------------------------------------------------------------------------------------------------------------------------------------------------------|-----------------------------------------------|
|                          |     | (c) Explain how missing data were addressed                                                                                                                                                                  | 19                                            |
|                          |     | (d) If applicable, explain how loss to follow-up was addressed                                                                                                                                               | 19                                            |
|                          |     | (e) Describe any sensitivity analyses                                                                                                                                                                        | 19                                            |
| <b>Results</b>           |     |                                                                                                                                                                                                              | Protocol paper thus results not yet available |
| Participants             | 13* | (a) Report numbers of individuals at each stage of study—eg numbers potentially eligible, examined for eligibility, confirmed eligible, included in the study, completing follow-up, and analysed            |                                               |
|                          |     | (b) Give reasons for non-participation at each stage                                                                                                                                                         |                                               |
|                          |     | (c) Consider use of a flow diagram                                                                                                                                                                           |                                               |
| Descriptive data         | 14* | (a) Give characteristics of study participants (eg demographic, clinical, social) and information on exposures and potential confounders                                                                     |                                               |
|                          |     | (b) Indicate number of participants with missing data for each variable of interest                                                                                                                          |                                               |
|                          |     | (c) Summarise follow-up time (eg, average and total amount)                                                                                                                                                  |                                               |
| Outcome data             | 15* | Report numbers of outcome events or summary measures over time                                                                                                                                               |                                               |
| Main results             | 16  | (a) Give unadjusted estimates and, if applicable, confounder-adjusted estimates and their precision (eg, 95% confidence interval). Make clear which confounders were adjusted for and why they were included |                                               |
|                          |     | (b) Report category boundaries when continuous variables were categorized                                                                                                                                    |                                               |
|                          |     | (c) If relevant, consider translating estimates of relative risk into absolute risk for a meaningful time period                                                                                             |                                               |
| Other analyses           | 17  | Report other analyses done—eg analyses of subgroups and interactions, and sensitivity analyses                                                                                                               |                                               |
| <b>Discussion</b>        |     |                                                                                                                                                                                                              |                                               |
| Key results              | 18  | Summarise key results with reference to study objectives                                                                                                                                                     | N/A protocol paper results not yet available  |
| <b>Limitations</b>       |     |                                                                                                                                                                                                              |                                               |
| Interpretation           | 20  | Give a cautious overall interpretation of results considering objectives, limitations, multiplicity of analyses, results from similar studies, and other relevant evidence                                   | 22-26                                         |
| Generalisability         | 21  | Discuss the generalisability (external validity) of the study results                                                                                                                                        | 22-26                                         |
| <b>Other information</b> |     |                                                                                                                                                                                                              |                                               |
| Funding                  | 22  | Give the source of funding and the role of the funders for the present study and, if applicable, for the original study on                                                                                   | 32                                            |

1  
2  
3  
4  
5  
6  
7  
8  
9  
10  
11  
12  
13  
14  
15  
16  
17  
18  
19  
20  
21  
22  
23  
24  
25  
26  
27  
28  
29  
30  
31  
32  
33  
34  
35  
36  
37  
38  
39  
40  
41  
42  
43  
44  
45  
46

|  |                                    |  |
|--|------------------------------------|--|
|  | which the present article is based |  |
|--|------------------------------------|--|

\*Give information separately for cases and controls in case-control studies and, if applicable, for exposed and unexposed groups in cohort and cross-sectional studies.

**Note:** An Explanation and Elaboration article discusses each checklist item and gives methodological background and published examples of transparent reporting. The STROBE checklist is best used in conjunction with this article (freely available on the Web sites of PLoS Medicine at <http://www.plosmedicine.org/>, Annals of Internal Medicine at <http://www.annals.org/>, and Epidemiology at <http://www.epidem.com/>). Information on the STROBE Initiative is available at [www.strobe-statement.org](http://www.strobe-statement.org).

For peer review only



**STROBE 2007 (v4) Statement—Checklist of items that should be included in reports of *cohort studies***

| Section/Topic                | Item # | Recommendation                                                                                                                                                                       | Reported on page #                                          |
|------------------------------|--------|--------------------------------------------------------------------------------------------------------------------------------------------------------------------------------------|-------------------------------------------------------------|
| <b>Title and abstract</b>    | 1      | (a) Indicate the study's design with a commonly used term in the title or the abstract                                                                                               | 1                                                           |
|                              |        | (b) Provide in the abstract an informative and balanced summary of what was done and what was found                                                                                  | 4-5                                                         |
| <b>Introduction</b>          |        |                                                                                                                                                                                      |                                                             |
| Background/rationale         | 2      | Explain the scientific background and rationale for the investigation being reported                                                                                                 | 6-9                                                         |
| Objectives                   | 3      | State specific objectives, including any prespecified hypotheses                                                                                                                     | 9-10                                                        |
| <b>Methods</b>               |        |                                                                                                                                                                                      |                                                             |
| Study design                 | 4      | Present key elements of study design early in the paper                                                                                                                              | 10-11                                                       |
| Setting                      | 5      | Describe the setting, locations, and relevant dates, including periods of recruitment, exposure, follow-up, and data collection                                                      | 10-15, Table 1                                              |
| Participants                 | 6      | (a) Give the eligibility criteria, and the sources and methods of selection of participants. Describe methods of follow-up                                                           | 11-12                                                       |
|                              |        | (b) For matched studies, give matching criteria and number of exposed and unexposed                                                                                                  | N/A (No matching)                                           |
| Variables                    | 7      | Clearly define all outcomes, exposures, predictors, potential confounders, and effect modifiers. Give diagnostic criteria, if applicable                                             | 13, 15-17                                                   |
| Data sources/<br>measurement | 8*     | For each variable of interest, give sources of data and details of methods of assessment (measurement). Describe comparability of assessment methods if there is more than one group | 11 (SSO cohort-same time points and methods). 12-13, 15-16, |
| Bias                         | 9      | Describe any efforts to address potential sources of bias                                                                                                                            | 14-15, 22-26 (limitations discussed)                        |
| Study size                   | 10     | Explain how the study size was arrived at                                                                                                                                            | 14                                                          |
| Quantitative variables       | 11     | Explain how quantitative variables were handled in the analyses. If applicable, describe which groupings were chosen and why                                                         | 19                                                          |
| Statistical methods          | 12     | (a) Describe all statistical methods, including those used to control for confounding                                                                                                | 14,19                                                       |
|                              |        | (b) Describe any methods used to examine subgroups and interactions                                                                                                                  | 19                                                          |

|                          |     |                                                                                                                                                                                                              |                                               |
|--------------------------|-----|--------------------------------------------------------------------------------------------------------------------------------------------------------------------------------------------------------------|-----------------------------------------------|
|                          |     | (c) Explain how missing data were addressed                                                                                                                                                                  | 19                                            |
|                          |     | (d) If applicable, explain how loss to follow-up was addressed                                                                                                                                               | 19                                            |
|                          |     | (e) Describe any sensitivity analyses                                                                                                                                                                        | 19                                            |
| <b>Results</b>           |     |                                                                                                                                                                                                              | Protocol paper thus results not yet available |
| Participants             | 13* | (a) Report numbers of individuals at each stage of study—eg numbers potentially eligible, examined for eligibility, confirmed eligible, included in the study, completing follow-up, and analysed            |                                               |
|                          |     | (b) Give reasons for non-participation at each stage                                                                                                                                                         |                                               |
|                          |     | (c) Consider use of a flow diagram                                                                                                                                                                           |                                               |
| Descriptive data         | 14* | (a) Give characteristics of study participants (eg demographic, clinical, social) and information on exposures and potential confounders                                                                     |                                               |
|                          |     | (b) Indicate number of participants with missing data for each variable of interest                                                                                                                          |                                               |
|                          |     | (c) Summarise follow-up time (eg, average and total amount)                                                                                                                                                  |                                               |
| Outcome data             | 15* | Report numbers of outcome events or summary measures over time                                                                                                                                               |                                               |
| Main results             | 16  | (a) Give unadjusted estimates and, if applicable, confounder-adjusted estimates and their precision (eg, 95% confidence interval). Make clear which confounders were adjusted for and why they were included |                                               |
|                          |     | (b) Report category boundaries when continuous variables were categorized                                                                                                                                    |                                               |
|                          |     | (c) If relevant, consider translating estimates of relative risk into absolute risk for a meaningful time period                                                                                             |                                               |
| Other analyses           | 17  | Report other analyses done—eg analyses of subgroups and interactions, and sensitivity analyses                                                                                                               |                                               |
| <b>Discussion</b>        |     |                                                                                                                                                                                                              |                                               |
| Key results              | 18  | Summarise key results with reference to study objectives                                                                                                                                                     | N/A protocol paper results not yet available  |
| <b>Limitations</b>       |     |                                                                                                                                                                                                              |                                               |
| Interpretation           | 20  | Give a cautious overall interpretation of results considering objectives, limitations, multiplicity of analyses, results from similar studies, and other relevant evidence                                   | 22-26                                         |
| Generalisability         | 21  | Discuss the generalisability (external validity) of the study results                                                                                                                                        | 22-26                                         |
| <b>Other information</b> |     |                                                                                                                                                                                                              |                                               |
| Funding                  | 22  | Give the source of funding and the role of the funders for the present study and, if applicable, for the original study on                                                                                   | 32                                            |

|  |  |                                    |  |
|--|--|------------------------------------|--|
|  |  | which the present article is based |  |
|--|--|------------------------------------|--|

\*Give information separately for cases and controls in case-control studies and, if applicable, for exposed and unexposed groups in cohort and cross-sectional studies.

**Note:** An Explanation and Elaboration article discusses each checklist item and gives methodological background and published examples of transparent reporting. The STROBE checklist is best used in conjunction with this article (freely available on the Web sites of PLoS Medicine at <http://www.plosmedicine.org/>, Annals of Internal Medicine at <http://www.annals.org/>, and Epidemiology at <http://www.epidem.com/>). Information on the STROBE Initiative is available at [www.strobe-statement.org](http://www.strobe-statement.org).

For peer review only
