# Supplementary material for: CTN 328: immunogenicity outcomes in people living with HIV in Canada following vaccination for COVID-19 (HIV-COV): protocol for an observational cohort study
Source: PubMed Central journal article supplement — BMJ Open. 2021 Dec 16;11(12):e054208. doi: 10.1136/bmjopen-2021-054208 (PMC8678543; doi:10.1136/bmjopen-2021-054208), 2021-12-16
Supplement: bmjopen-2021-054208supp001.pdf [file bmjopen-2021-054208supp001.pdf]

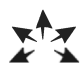

the CTN  
CHR Canadian  
HIV Trials Network

le Réseau  
Réseau canadien  
pour les essais VIH des IRSC

CTN 328  
HIV-COV

DATA COLLECTION  
WORKSHEET

Participant ID

|  |  |  |  |  |  |
|--|--|--|--|--|--|
|  |  |  |  |  |  |
|--|--|--|--|--|--|

Vaccine 1

Vaccine 2

## COVID-19 SYMPTOMS QUESTIONNAIRE

Have you experienced any of the following COVID-19 signs or symptoms?

| Sign                         | Yes | No | If yes, provide date, time |
|------------------------------|-----|----|----------------------------|
| Fever, chills                |     |    |                            |
| Cough                        |     |    |                            |
| Shortness of breath          |     |    |                            |
| Acute loss of smell or taste |     |    |                            |
| Fatigue                      |     |    |                            |
| Headache                     |     |    |                            |
| Muscle aches                 |     |    |                            |
| Nausea/Vomiting/Diarrhea     |     |    |                            |
| General weakness             |     |    |                            |
| Nasal congestion             |     |    |                            |
| Sore throat                  |     |    |                            |

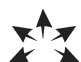

the CTN  
CHRR Canadian  
HIV Trials Network

le Réseau  
Réseau canadien  
pour les essais VIH des IRSC

CTN 328  
HIV-COV

DATA COLLECTION  
WORKSHEET

Participant ID

|  |  |  |  |  |  |  |
|--|--|--|--|--|--|--|
|  |  |  |  |  |  |  |
|--|--|--|--|--|--|--|

Vaccine 1

Vaccine 2

### PARTICIPANT DIARY

Following each injection of COVID-19 vaccine, please indicate whether you experienced any of the following, within 7 days and within 30 days, and indicate the severity. See the Other Signs or Symptoms worksheet for a guide to the severity levels.

|                                                  | Date:  | Date: | Date: | Date: | Date: | Date: | Date: | Date: |                |
|--------------------------------------------------|--------|-------|-------|-------|-------|-------|-------|-------|----------------|
| Sign or Symptom                                  | Day 0* | Day 1 | Day 2 | Day 3 | Day 4 | Day 5 | Day 6 | Day 7 | Within 30 days |
| Pain at injection site                           |        |       |       |       |       |       |       |       |                |
| Redness                                          |        |       |       |       |       |       |       |       |                |
| Swelling                                         |        |       |       |       |       |       |       |       |                |
| Lymphadenopathy/Axillary swelling and tenderness |        |       |       |       |       |       |       |       |                |
| Fatigue                                          |        |       |       |       |       |       |       |       |                |
| Headache                                         |        |       |       |       |       |       |       |       |                |
| Muscle Pain                                      |        |       |       |       |       |       |       |       |                |
| Chills                                           |        |       |       |       |       |       |       |       |                |
| Joint pain                                       |        |       |       |       |       |       |       |       |                |
| Fever                                            |        |       |       |       |       |       |       |       |                |
| Diarrhea                                         |        |       |       |       |       |       |       |       |                |
| Nausea and/or Vomiting                           |        |       |       |       |       |       |       |       |                |

\* Day 0 refers to day vaccine received, Day 1 is the *following day*, and so forth

Initials: \_\_\_\_\_

Date: \_\_\_\_\_

Page \_\_\_\_ of \_\_\_\_





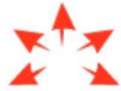

the CTN  
CIHR Canadian  
HIV Trials Network

le Réseau  
Réseau canadien  
pour les essais VIH des IRSC

## CTN 328: HIV-COV

### CITF CDE BASELINE QUESTIONNAIRE

**This version is only administered at Screening**

*Please answer all questions unless otherwise indicated*

**Participant ID:** \_ \_ \_ \_ \_

#### **Section 1: Demographics**

1. Date (DD-MMM-YYYY):

\_ \_ \_ / \_ \_ \_ / \_ \_ \_ \_ \_

2. What is your age?

\_ \_ \_ \_ YRS \_ \_ \_ MO OR  Prefer not to answer

3. What was your assigned sex at birth?

- Male
- Female
- Prefer to self-describe (specify) \_\_\_\_\_
- Prefer not to answer

4. What is your sex now?

- Male
- Female
- Prefer to self-describe (specify) \_\_\_\_\_
- Prefer not to answer

5. What is your gender (how do you currently self-identify)?

- Male
- Female
- Non-binary, genderqueer, agender or a similar identity
- Two-spirit
- Prefer to self-describe (specify) \_\_\_\_\_
- Prefer not to answer

6. Are you an Indigenous person originating from North America?

[If NO or Prefer not to answer, please proceed to Q9](#)

- No
- Yes
- Prefer not to answer

7. Which of the following groups do you belong to? Please select all that apply.

[Only answer if Q6 = YES](#)

- First Nations
- Inuit
- Metis
- Non-status First Nations
- Other Indigenous (specify) \_\_\_\_\_
- Prefer not to answer

8. Do you live on reserve?

[Only answer if Q7 = First Nations](#)

- Yes
- No
- Prefer not to answer

9. How would you describe your ethnicity or race? Please select all that apply.

If you are an Indigenous person and answered YES to Q6, select any other that apply.

- |                                          |                                                            |
|------------------------------------------|------------------------------------------------------------|
| <input type="checkbox"/> White           | <input type="checkbox"/> West Asian                        |
| <input type="checkbox"/> South Asian     | <input type="checkbox"/> Korean                            |
| <input type="checkbox"/> Chinese         | <input type="checkbox"/> Japanese                          |
| <input type="checkbox"/> Black           | <input type="checkbox"/> Prefer to self-describe (specify) |
| <input type="checkbox"/> Filipino        | _____                                                      |
| <input type="checkbox"/> Latin American  | <input type="checkbox"/> Prefer not to answer              |
| <input type="checkbox"/> Arab            |                                                            |
| <input type="checkbox"/> Southeast Asian |                                                            |

10. What are the first three digits of your postal code?

\_\_\_\_ OR  Prefer not to answer

11. What is the highest level of education you have completed?

- Less than high school graduation
- High school graduation
- Trade certificate, vocational school, or apprenticeship training
- Non-university certificate or diploma from a community college, CEGEP
- University Bachelor's degree
- University graduate degree (Master's, Doctorate, etc.)
- Prefer not to answer

12. How many people live in your household, including yourself?

\_\_\_\_\_ OR  Prefer not to answer

13. How many bedrooms are in your household?

\_\_\_\_\_ OR  Prefer not to answer

14. How many bathrooms are in your household?

\_\_\_\_\_ OR  Prefer not to answer

## **Section 2: COVID-19**

15. Do you think you have had COVID-19?

[If NO or Prefer not to answer, please proceed to Q18](#)

- No
- Yes
- Prefer not to answer

16. Why do you think you have had COVID-19? Please select all that apply.

[Only answer if Q15 = YES](#)

- Symptom review online
- Symptom profile
- Nasal/throat test result
- Health care provider
- Contact with case
- Other (specify) \_\_\_\_\_
- Prefer not to answer

17. Were you hospitalized due to COVID-19?

[Only answer if Q15 = YES](#)

- No
- Yes
- Prefer not to answer

18. Have you ever been tested for an active COVID-19 infection (using nasopharyngeal/throat swab, saliva, or gargle test)?

[If NO or Prefer not to answer, please proceed to Q21](#)

- No
- Yes
- Prefer not to answer

19. If yes, how many times have you been tested?

[Only answer if Q18 = YES](#)

\_\_\_\_\_ OR  Prefer not to answer

20.1 Answer the following questions about the **first COVID-19 test**, if applicable.

20.1.a What was the date of the **first** test?

\_\_\_ \_\_\_ DD / \_\_\_ \_\_\_ MO / \_\_\_ \_\_\_ \_\_\_ YR

20.1.b What was the result of the **first** test?

- Negative
- Positive
- Don't know



20.1.c Did you have any symptoms of COVID when you had this test?

- No
- Yes
- Don't know

20.1.d If yes, what symptoms did you have?

[Only answer if Q20.1.c = YES](#)

- Cough
- Fever
- Shortness of breath
- Sore muscles
- Headache
- Sore throat
- Diarrhea
- Decreased sense of smell or taste
- Other (specify) \_\_\_\_\_

20.2 Answer the following questions about the **second COVID-19 test**, if applicable.

20.2.a What was the date of the **second** test?

\_\_\_ \_\_\_ DD / \_\_\_ \_\_\_ MO / \_\_\_ \_\_\_ \_\_\_ YR

20.2.b What was the result of the **second** test?

- Negative
- Positive
- Don't know

20.2.c Did you have any symptoms of COVID when you had this test?

- No
- Yes
- Don't know

20.2.d If yes, what symptoms did you have?

[Only answer if Q20.2.c = YES](#)

- Cough
- Fever
- Shortness of breath
- Sore muscles
- Headache
- Sore throat
- Diarrhea
- Decreased sense of smell or taste
- Other (specify) \_\_\_\_\_

20.3 Answer the following questions about the **third COVID-19 test**, if applicable.

20.3.a What was the date of the **third** test?

\_\_\_ \_\_\_ DD / \_\_\_ \_\_\_ MO / \_\_\_ \_\_\_ \_\_\_ YR

20.3.b What was the result of the **third** test?

- Negative
- Positive
- Don't know

20.3.c Did you have any symptoms of COVID when you had this test?

- No
- Yes
- Don't know

20.3.d If yes, what symptoms did you have?

[Only answer if Q20.3.c = YES](#)

- Cough
- Fever
- Shortness of breath
- Sore muscles
- Headache
- Sore throat
- Diarrhea
- Decreased sense of smell or taste
- Other (specify) \_\_\_\_\_

20.4.a Have you **tested positive** for COVID-19 (using nasopharyngeal, throat swab, saliva or gargle test) on a test that wasn't included the questions above (that is, on the **4th or later test**)?

[If NO, please proceed to Q21](#)

- No
- Yes

20.4.b If yes, what was the date the first time you tested positive?

[Only answer if Q20.4.a = YES](#)

\_\_\_ \_\_\_ DD / \_\_\_ \_\_\_ MO \_\_\_ \_\_\_ \_\_\_ YR

### **Section 3: Exposure**

21.a Have you traveled outside of your home province since **January 2020**?

[If NO, please proceed to Q23](#)

- No
- Yes
- Prefer not to answer

21.b If you think you had COVID, did you travel in the 6 months before your symptoms began?

[Only answer if Q15 = YES](#)

- No
- Yes
- Prefer not to answer

22. What province(s)/territory(ies) or country(ies) did you travel to? Select all that apply.

[Only answer if Q21.a or Q21.b = YES](#)

- Alberta
- British Columbia
- Manitoba
- New Brunswick
- Newfoundland and Labrador
- Northwest Territories
- Nova Scotia
- Nunavut
- Ontario
- Prince Edward Island
- Quebec
- Saskatchewan
- Yukon

OR  Prefer not to answer

List countries you travelled to (separated by a comma):

---



---



---



---

23.a Do you do either paid or unpaid work in an environment where you work in close proximity to other people?

[If NO or Prefer not to answer, please proceed to Q24](#)

- No
- Yes
- Prefer not to answer

23.b If yes, have you been working in any of the following occupations or worksites in the past year? Please select all that apply.

[Only answer if Q23.a = YES](#)

- |                                                                                 |                                                |
|---------------------------------------------------------------------------------|------------------------------------------------|
| <input type="checkbox"/> Hospital or health care facility                       | <input type="checkbox"/> Pharmacy              |
| <input type="checkbox"/> First responder (paramedic/firefighter/police officer) | <input type="checkbox"/> Hairdresser or barber |
| <input type="checkbox"/> Childcare worker                                       | <input type="checkbox"/> Aesthetician          |
| <input type="checkbox"/> Correctional officer                                   | <input type="checkbox"/> Flight attendant      |
| <input type="checkbox"/> Teacher or other school staff                          | <input type="checkbox"/> Factor worker         |
| <input type="checkbox"/> Transit driver                                         | <input type="checkbox"/> Other (specify)       |
| <input type="checkbox"/> Food service industry                                  | <input type="checkbox"/> _____                 |
| <input type="checkbox"/> Grocery store                                          | <input type="checkbox"/> Prefer not to answer  |

24.a How many times have you been in a gathering of 10 or more since **March 2020**?

\_\_\_\_\_ OR  Prefer not to answer

24.b If you think you have had COVID, how many times were you in gatherings of more than 10 people in the 6 months before your symptoms began?

[Only answer if Q15 = YES](#)

\_\_\_\_\_ OR  Prefer not to answer

#### **Section 4: Health and Health Behaviours**

25. Do you currently smoke tobacco?

- No
- Yes
- Prefer not to answer

26. If yes, how often do you smoke tobacco?

[Only answer if Q25 = YES](#)

- Less than daily
- Daily

27. Do you currently use e-cigarettes (vape)?

- No
- Yes
- Prefer not to answer

28. If yes, how often do you use e-cigarettes (vape)?

[Only answer if Q27 = YES](#)

- Less than daily
- Daily

29. Have you been diagnosed by a physician with any of the following chronic medical conditions? Please provide an answer for each condition.

|    |                               | Yes | No | Don't Know | Prefer not to answer |
|----|-------------------------------|-----|----|------------|----------------------|
| a. | Hypertension                  |     |    |            |                      |
| b. | Diabetes                      |     |    |            |                      |
| c. | Asthma                        |     |    |            |                      |
| d. | Chronic Lung Disease          |     |    |            |                      |
| e. | Chronic Heart Disease         |     |    |            |                      |
| f. | Chronic Kidney Disease        |     |    |            |                      |
| g. | Liver Disease                 |     |    |            |                      |
| h. | Cancer                        |     |    |            |                      |
| i. | Chronic Blood Disorder        |     |    |            |                      |
| j. | Immune Suppressed             |     |    |            |                      |
| k. | Chronic Neurological Disorder |     |    |            |                      |

30. What is your current weight (circle units)?

\_\_\_\_\_ kg / lbs      OR       Prefer not to answer

31. What is your current height?

\_\_\_\_ . \_\_\_\_ \_\_\_\_ m      OR      \_\_\_\_ ft \_\_\_\_ \_\_\_\_ in      OR       Prefer not to answer

32. Do you have a family physician/primary care provider?

- No
- Yes
- Don't know
- Prefer not to answer

33. Do you usually get a flu shot?

- No
- Yes
- Prefer not to answer

34. Indicate if, or how often you have done the following since **March 2020**?

|    |                                                                                           | Never | Rarely | Occasionally | Often                | Always | Prefer not to answer |                      |
|----|-------------------------------------------------------------------------------------------|-------|--------|--------------|----------------------|--------|----------------------|----------------------|
| a. | Worn a mask in public places                                                              |       |        |              |                      |        |                      |                      |
| b. | Practiced physical distancing in public places                                            |       |        |              |                      |        |                      |                      |
| c. | Avoided crowded places/gatherings                                                         |       |        |              |                      |        |                      |                      |
| d. | Avoided common greetings (such as a handshake or hug)                                     |       |        |              |                      |        |                      |                      |
|    |                                                                                           | Never | Rarely | Occasionally | Often                | Always | N/A                  | Prefer not to answer |
| e. | Limited contact with people at higher risk (e.g., an elderly relative)                    |       |        |              |                      |        |                      |                      |
|    |                                                                                           | No    | Yes    | N/A          | Prefer not to answer |        |                      |                      |
| f. | Self-isolated because you thought you were infected with COVID-19                         |       |        |              |                      |        |                      |                      |
| g. | Self-quarantined because you may have been exposed to COVID-19, but did not show symptoms |       |        |              |                      |        |                      |                      |

35. If you think you have had COVID, have you done the following in the 6 months before your symptoms began? (indicate how often).

[Only answer if Q15 = YES](#)

|    |                                                                                           | Never | Rarely | Occasionally | Often | Always               | N/A | Prefer not to answer |
|----|-------------------------------------------------------------------------------------------|-------|--------|--------------|-------|----------------------|-----|----------------------|
| a. | Worn a mask in public places                                                              |       |        |              |       |                      |     |                      |
| b. | Practiced physical distancing in public places                                            |       |        |              |       |                      |     |                      |
| c. | Avoided crowded places/gatherings                                                         |       |        |              |       |                      |     |                      |
| d. | Avoided common greetings (such as handshake or hug)                                       |       |        |              |       |                      |     |                      |
| e. | Limited contact with people at higher risk (e.g., an elderly relative)                    |       |        |              |       |                      |     |                      |
|    |                                                                                           | No    | Yes    | N/A          |       | Prefer not to answer |     |                      |
| f. | Self-isolated because you thought you were infected with COVID-19                         |       |        |              |       |                      |     |                      |
| g. | Self-quarantined because you may have been exposed to COVID-19, but did not show symptoms |       |        |              |       |                      |     |                      |



**Section 5: Vaccine**

36. Have you been vaccinated against COVID-19? Answer YES if you have received at least one dose of the COVID-19 vaccine.

[If NO or Prefer not to answer, proceed to Q43](#)

- No
- Yes
- Prefer not to answer

37. How many doses of the COVID-19 vaccine have you received so far?

[Only answer if Q36 = YES](#)

- One
- Two
- More than two

38. When did you receive the **first dose** of the COVID-19 vaccine?

[Only answer if Q36 = YES](#)

\_\_\_ DD / \_\_\_ MM / \_\_\_ YR

39. When did you receive the **second dose** of the COVID-19 vaccine?

[Only answer if Q37 = TWO or MORE THAN TWO](#)

\_\_\_ DD / \_\_\_ MM / \_\_\_ YR

40. Which vaccine did you receive?

[Only answer if Q36 = YES](#)

- Pfizer and BioNTech mRNA vaccine
- Moderna mRNA vaccine
- AstraZeneca Oxford vaccine
- Other (specify) \_\_\_\_\_
- Janssen (Johnson & Johnson) vaccine
- Don't know
- Prefer not to answer

41. Were you pregnant when you received the vaccine?

[If NO or N/A, proceed to Q43](#)

- No
- Yes
- N/A

42. If yes, what trimester were you in when you received the vaccine?

[Only answer if Q41 = YES](#)

- First  
 Second  
 Third

### **Section 6: Cannabis Use**

43. Have you used cannabis (even once) in the past 12 months?

[If NO, proceed to the end of this questionnaire](#)

- No  
 Yes

43.a If yes, how do you use cannabis? Please check all that apply.

[Only answer if Q43 = YES](#)

|                                    | Yes | No |
|------------------------------------|-----|----|
| Smoked dried plant                 |     |    |
| Vaporized                          |     |    |
| Oil                                |     |    |
| Pills                              |     |    |
| Added to baked good or other foods |     |    |
| Other (specify)                    |     |    |

43.b If you smoke cannabis, please specify how you smoked/took cannabis:

I do not smoke cannabis (proceed to Q44)

|                                               | Yes | No |
|-----------------------------------------------|-----|----|
| Smoked as joint                               |     |    |
| Smoked as joint mixed with tobacco            |     |    |
| Smoked as pipe                                |     |    |
| Smoked as water pipe (bong)                   |     |    |
| Inhaled using a vaporizer                     |     |    |
| Eaten (e.g. as brownies, cake, cookies, etc.) |     |    |
| Other (specify)                               |     |    |

44. Which response **best** describes how often you **currently** use cannabis?

[Only answer if Q43 = YES](#)

- Rarely (2-3 times a year)
- Monthly
- Weekly
- Daily
- More than once a day

45. How many grams per week do you consume?

[Only answer if Q43 = YES](#)

- Less than 1 gram
- 1-5 grams
- 6-9 grams
- 10 or more grams
- Unknown

46. If you smoke cannabis, on average how many joints/cigarettes do you smoke per day?

[Only answer if Q43 = YES](#)

\_\_\_\_\_

OR

I do not smoke cannabis

**END OF QUESTIONNAIRE**

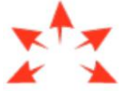

the CTN  
CIHR Canadian  
HIV Trials Network

le Réseau  
Réseau canadien  
pour les essais VIH des IRSC

## CTN 328: HIV-COV

### CITF CDE FOLLOW-UP QUESTIONNAIRE

**This version is administered at Visits 2, 3, 4, 5, and at unscheduled visits**

*Please answer all questions unless otherwise indicated*

**Participant ID:** \_ \_ \_ \_ \_

1. Date (DD-MMM-YYYY):

\_ \_ / \_ \_ / \_ \_ \_ \_

#### **Section 1: COVID-19**

2. Do you think you have had COVID-19 since your last visit?

[If NO or Prefer not to answer, please proceed to Q5](#)

- No
- Yes
- Prefer not to answer

3. Why do you think you have had COVID-19 since your last visit? Please select all that apply.

[Only answer if Q2 = YES](#)

- Symptom review online
- Symptom profile
- Nasal/throat test result
- Health care provider
- Contact with case
- Other (specify) \_\_\_\_\_
- Prefer not to answer

4. Since your last visit, have you been hospitalized due to COVID-19?

[Only answer if Q2 = YES](#)

- No
- Yes
- Prefer not to answer

5. Since your last visit, have you been tested for an active COVID-19 infection (using nasopharyngeal/throat swab, saliva, or gargle test)?

[If NO or Prefer not to answer, please proceed to Q8](#)

- No
- Yes
- Prefer not to answer

6. If yes, how many times have you been tested since your last visit?

[Only answer if Q5 = YES](#)

\_\_\_\_\_ OR  Prefer not to answer

7.1 Answer the following questions about the **first COVID-19 test since your last visit**, if applicable.

7.1.a What was the date of the **first** test?

\_\_\_ \_\_\_ DD / \_\_\_ \_\_\_ MO / \_\_\_ \_\_\_ \_\_\_ YR

7.1.b What was the result of the **first** test?

- Negative
- Positive
- Don't know

7.1.c Did you have any symptoms of COVID when you had this test?

- No
- Yes
- Don't know

7.1.d If yes, what symptoms did you have?

[Only answer if Q7.1.c = YES](#)

- Cough
- Fever
- Shortness of breath
- Sore muscles
- Headache
- Sore throat
- Diarrhea
- Decreased sense of smell or taste
- Other (specify) \_\_\_\_\_

7.2 Answer the following questions about the **second COVID-19 test since your last visit**, if applicable.

7.2.a What was the date of the **second** test?

\_\_\_ DD / \_\_\_ MO / \_\_\_ YR

7.2.b What was the result of the **second** test?

- Negative
- Positive
- Don't know

7.2.c Did you have any symptoms of COVID when you had this test?

- No
- Yes
- Don't know

7.2.d If yes, what symptoms did you have?

[Only answer if Q7.2.c = YES](#)

- Cough
- Fever
- Shortness of breath
- Sore muscles
- Headache
- Sore throat
- Diarrhea
- Decreased sense of smell or taste
- Other (specify) \_\_\_\_\_

7.3 Answer the following questions about the **third COVID-19 test since your last visit**, if applicable.

7.3.a What was the date of the **third** test?

\_\_\_ \_\_\_ DD / \_\_\_ \_\_\_ MO / \_\_\_ \_\_\_ \_\_\_ YR

7.3.b What was the result of the **third** test?

- Negative
- Positive
- Don't know

7.3.c Did you have any symptoms of COVID when you had this test?

- No
- Yes
- Don't know

7.3.d If yes, what symptoms did you have?

[Only answer if Q7.3.c = YES](#)

- Cough
- Fever
- Shortness of breath
- Sore muscles
- Headache
- Sore throat
- Diarrhea
- Decreased sense of smell or taste
- Other (specify) \_\_\_\_\_

7.4.a Have you **tested positive** for COVID-19 since your last visit on a test that wasn't included the questions above (that is, on the **4th or later test**)?

[If NO, please proceed to Q8](#)

- No
- Yes

7.4.b If yes, what was the date the first time you tested positive since your last visit?

[Only answer if Q7.4.a = YES](#)

\_\_\_ \_\_\_ DD / \_\_\_ \_\_\_ MO \_\_\_ \_\_\_ \_\_\_ YR

**Section 2: Exposure**

8. Have you traveled outside of your home province since your last visit?

- No  
 Yes  
 Prefer not to answer

9.a Since your last visit, have you worked (either paid or unpaid) in an environment where you work in close proximity to other people?

[If NO or Prefer not to answer, please proceed to Q10](#)

- No  
 Yes  
 Prefer not to answer

9.b If yes, have you been working in any of the following occupations or worksites since your last visit? Please select all that apply.

[Only answer if Q9.a = YES](#)

- Hospital or health care facility  
 First responder (paramedic/firefighter/police officer)  
 Childcare worker  
 Correctional officer  
 Teacher or other school staff  
 Transit driver  
 Food service industry  
 Grocery store  
 Pharmacy  
 Hairdresser or barber  
 Aesthetician  
 Flight attendant  
 Factor worker  
 Other (specify) \_\_\_\_\_  
 Prefer not to answer

10. How many times have you been in a gathering of 10 or more since your last visit?

\_\_\_\_\_ OR  Prefer not to answer



**Section 3: Vaccine**

11. Have you been vaccinated against COVID-19 since your last visit? Answer YES if you have **received at least one dose of the COVID-19 vaccine since your last visit**.

[If NO or Prefer not to answer, proceed to the end of this questionnaire](#)

- No
- Yes
- Prefer not to answer

12. How many doses of the COVID-19 vaccine have you received since your last visit?

[Only answer if Q11 = YES](#)

- One
- Two
- More than two

13. When did you receive the **first dose** of the COVID-19 vaccine since your last visit?

[Only answer if Q11= YES](#)

\_\_\_\_ DD / \_\_\_\_ MM / \_\_\_\_ YR

14. Which vaccine did you receive for this **first dose** since your last visit?

[Only answer if Q11= YES](#)

- Pfizer and BioNTech mRNA vaccine
- Moderna mRNA vaccine
- AstraZeneca Oxford vaccine
- Other (specify) \_\_\_\_\_
- Janssen (Johnson & Johnson) vaccine
- Don't know
- Prefer not to answer

15. Were you pregnant when you received this **first dose** since your last visit?

[If NO or N/A, proceed to Q17](#)

- No
- Yes
- N/A

16. If yes, what trimester were you in when you received this **first dose** since your last visit?

[Only answer if Q15 = YES](#)

- First
- Second
- Third

17. When did you receive the **second dose** of the COVID-19 vaccine since your last visit?

[Only answer if Q12 = TWO or MORE THAN TWO](#)

\_\_\_ \_\_\_ DD / \_\_\_ \_\_\_ MM / \_\_\_ \_\_\_ \_\_\_ \_\_\_ YR

18. Which vaccine did you receive for this **second dose** since your last visit?

[Only answer if Q12 = TWO or MORE THAN TWO](#)

- Pfizer and BioNTech mRNA vaccine
- Moderna mRNA vaccine
- AstraZeneca Oxford vaccine
- Other (specify) \_\_\_\_\_
- Janssen (Johnson & Johnson) vaccine
- Don't know
- Prefer not to answer

19. Were you pregnant when you received this **second dose** since your last visit?

[If NO or N/A, proceed to the end of this questionnaire](#)

- No
- Yes
- N/A

20. If yes, what trimester were you in when you received this **second dose** since your last visit?

[Only answer if Q19 = YES](#)

- First
- Second
- Third

**END OF QUESTIONNAIRE**
